# Supplementary material for: Burden of Disease of Gonorrhoea in Latin America: Systematic Review and Meta-analysis
Source: Springer Nature journal article supplement (doi:10.1007/s40121-023-00814-0), 2023-06-01
Supplement: MOESM1 [file 25434596]

# **Burden of disease of gonorrhoea in Latin America: systematic review and meta-analysis**

Ariel Bardach<sup>1</sup>, Tomás Alconada<sup>1</sup>, Carolina Palermo<sup>1</sup>, Carlos Rojas-Roque<sup>1</sup>, María Macarena Sandoval<sup>1</sup>,  
Jorge Gomez<sup>2</sup>, Thatiana Pinto<sup>3</sup>, Agustin Ciapponi<sup>1</sup>

<sup>1</sup>Institute for Clinical Effectiveness and Health Policy, Buenos Aires, Argentina; <sup>2</sup> GSK, Buenos Aires,  
Argentina; <sup>3</sup>GSK Panama City, Panama

[abardach@iecs.org.ar](mailto:abardach@iecs.org.ar)

[alconadatomas@gmail.com](mailto:alconadatomas@gmail.com)

[mariacarolinapalermo@yahoo.com.ar](mailto:mariacarolinapalermo@yahoo.com.ar)

[crojas@iecs.org.ar](mailto:crojas@iecs.org.ar)

[macarena\\_sandoval@yahoo.com.ar](mailto:macarena_sandoval@yahoo.com.ar)

[Jorge.a.gomez@gsk.com](mailto:Jorge.a.gomez@gsk.com)

[thatiana.x.pinto@gsk.com](mailto:thatiana.x.pinto@gsk.com)

[aciapponi@iecs.org.ar](mailto:aciapponi@iecs.org.ar)

**Correspondence to:** Agustin Ciapponi, Dr Emilio Ravnani 2024 (C1014CPV) Buenos Aires, Argentina,

Tel: +5411 4777 8767, Email: [aciapponi@iecs.org.ar](mailto:aciapponi@iecs.org.ar)

# SUPPLEMENTARY MATERIAL

## Supplementary Material Table S1 Search strategies

---

### 1. MEDLINE PubMed

(Gonorrhea[Mesh] OR Gonorrhoea\*[tiab] OR Neisseria Gonorrhoeae[Mesh] OR N.Gonorrhea\*[tiab] OR Gonococc\*[tiab]) AND (America[MeSH Terms:noexp] OR America\*[tiab] OR Latin America [Mesh] OR Latin America\*[tiab] OR Latin America\*[tiab] OR Latin America\*[tiab] OR Latina\*[tiab] OR Hispanic Americans[Mesh] OR Latin America\*[tiab] OR Latin America\*[tiab] OR Iberoamerica\*[tiab] OR Ibero Americ\*[tiab] OR Pan American\*[tiab] OR Central America[Mesh] OR Central America\*[tiab] OR Central America\*[tiab] OR Mesoamerica\*[tiab] OR Mesoamerica\*[tiab] OR Middle America\* [tiab] OR South America[Mesh] OR South America\*[tiab] OR South America\*[tiab] OR "South America"[tiab] OR Caribbean Region[mesh] OR Caribbean\*[tiab] OR West Indies[ Mesh] OR West Indies[Mesh] OR West Indi\*[tiab] OR Antill\*[tiab] OR Indians, South American[Mesh] OR Indians, Centroamericano[Mesh] OR Amerindians\*[tiab] OR Indios[tiab] OR American Indians \* [tiab] OR Native American\*[tiab] OR Patagoni\*[tiab] OR Andes[tiab] OR Andean\*[tiab] OR Amazon\*[tiab] OR Argentin\*[ad] OR Argentin\*[tiab] OR Argentina[pl] OR Bolivia\*[ad] OR Bolivia\*[tiab] OR Bolivia[pl] OR Brazil\*[ad] OR Brazil\*[ad] OR Brazil\*[tiab] OR Brazil\*[tiab ] OR Brazil[pl] OR Colombia\*[ad] OR Colombia\*[tiab] OR Colombia[pl] OR Chile\*[ad] OR Chile\*[ad] OR Chile\*[ad] OR Chile\*[tiab] tiab] OR Chile[pl] OR Ecuador\*[ad] OR Ecuador\*[ad] OR Ecuador\*[tiab] OR Ecuador[pl] OR Guiana\*[ad] OR Guyana\*[tiab] OR French Guiana[pl] OR Guyan\*[ad ] OR Guyan\*[tiab] OR Guyana[pl] OR Paraguay\*[ad] OR Paraguay\*[tiab] OR Paraguay[pl] OR Peru\*[ad] OR Peru\*[tiab] OR Peru[pl] OR Suriname\*[ tiab] OR Suriname\*[tiab] OR Suriname[pl] OR Uruguay\*[ad] OR Uruguay\*[tiab] OR Uruguay[pl] OR Venezuela\*[ad] OR Venezuela\*[tiab] OR Venezuela[pl] OR Belize\* [ad] OR Belize\*[tiab] OR Belize[pl] OR Costa Ric\*[ad] OR Costaric\*[ad] OR Costa Ric\*[tiab] OR Costaric\*[tiab] OR Costaric\*[ tiab] OR Costa Rica[pl] OR Salvador\*[ad] OR Salvador\*[tiab] OR El Salvador[pl] OR Guatemala\*[ad] OR Guatemala\*[tiab] OR Guatemala[pl] OR Hondur\*[ad] OR Hondur\*[tiab] OR Honduras[pl] OR Nicaragua\*[ad] OR Nicaragu\*[tiab] OR Nicaragua[pl] OR Panam\*[ad] OR Panam\*[tiab] OR Panama[pl] OR Mexico[Mesh] OR Mexic\*[ad] OR Mexic\*[tiab] OR Meji\*[tiab] OR Mexico[pl] OR Cuba\*[ad] OR Cuba\*[tiab] OR Cuba[pl] OR Dominic\*[ad] OR Dominic\*[tiab] OR Dominican Republic[pl] OR Haiti\*[ad] OR Haiti[pl] OR Jamaic\*[ad] OR Jamaic\*[tiab] OR Jamaica[pl] OR Puerto Rico[Mesh] OR Puerto Ric\*[tiab] OR Puertoric\*[tiab] OR Puertoric\*[tiab] OR Puertoric\*[ tiab])

---

### 2. EMBase (Elsevier)

#9 #8 AND (2011:py OR 2012:py OR 2013:py OR 2014:py OR 2015:py OR 2016:py OR 2017:py OR 2018:py OR 2019:py OR 2020:py) #8 #6 and #7

#7 americas:ti,ab OR 'south and central america'/exp OR ((latin NEAR/1 america\*):ti,ab) OR latinamerica\*:ti,ab OR latinoamerica\*:ti,ab OR hispanoamerica:ti, ab OR iberoamerica\*:ti,ab OR ((ibero NEAR/1 americ\*):ti,ab) OR panamerica\*:ti,ab OR ((south NEAR/1 america\*):ti,ab) OR southamerica\*:ti ,ab OR south america\*:ti,ab OR (america:ti,ab AND del:ti,ab AND south:ti,ab) OR ((central NEAR/1 america\*):ti,ab) OR central america\*:ti, ab OR mesoamerica\*:ti,ab OR ((meso NEAR/1 america\*):ti,ab) OR ((middle NEAR/1 america\*):ti,ab) OR 'caribbean'/exp OR 'caribbean islands'/ exp OR caribbean\*:ti,ab OR caribbean\*: ti,ab OR ((west NEAR/1 indi\*):ti,ab) OR antill\*:ti,ab OR 'american indian'/exp OR amerindian\*:ti, ab OR indians:ti,ab OR ((native NEAR/1 america\*):ti,ab) OR patagoni\*:ti,ab OR andes:ti,ab OR andean\*:ti,ab OR amazon\*:ti,ab OR 'argentina'/exp OR argentin\*:ti,ab OR 'bolivia'/exp OR bolivia\*:ti,ab OR 'brazil'/exp OR brazil\*:ti,ab OR brasil\*:ti,ab OR 'colombia'/ exp OR colombia\*:ti,ab OR 'chile'/exp OR chile\*: ti,ab OR 'ecuador'/exp OR ecuador\*:ti,ab OR 'french guiana'/exp OR guiana\*:ti,ab OR 'guyana'/exp OR guyan\*:ti,ab OR 'paraguay'/exp OR paraguay\*: ti,ab OR 'peru'/exp OR peru\*:ti,ab OR 'suriname'/exp OR suriname\*:ti,ab OR 'uruguay'/exp OR uruguay\*:ti,ab OR 'venezuela'/ exp OR VENEz\*:ti,ab OR 'belize'/exp OR beliz\*:ti,ab OR 'costa rica'/exp OR 'costa rica':ti,ab OR costaric\*:ti,ab OR costaric\*:ti, ab OR 'el salvador'/exp OR SALVADOR\*:ti,ab OR 'guatemala'/exp OR guatemal\*:ti,ab OR 'honduras'/or or hondur\*:ti,ab OR 'nicaragua'/exp OR nicaragu \*:ti,ab OR 'panama'/exp OR panam\*:ti,ab OR 'mexico'/exp OR mexic\*:ti,ab OR meji\*:ti,ab OR 'cuba'/exp OR cuba\*:ti, ab OR 'dominican republic'/exp OR dominica\*: ti,ab OR 'haiti'/exp OR haiti\*:ti,ab OR 'jamaica'/exp OR jamaic\*:ti,ab OR 'puerto rico'/exp OR ( (port NEAR/1 ric\*):ti,ab) OR puertoric\*:ti,ab OR puertoric\*:ti,ab

#6 #1 OR #2 OR #3 OR #4 OR #5

#5 gonococc\*:ti,ab

#4 n.gonorrhea\*:ti,ab

#3 "neisseria gonorrhoeae"/exp

#2 gonorrhea\*:ti,ab

#1 'gonorrhea'/exp

---

### 3. Cochrane-Central Library (Wiley)

#1MeSH descriptor: [Gonorrhea] blows up all the trees #2Gonorrhoea\*:ti,ab,kw

#3MeSH descriptor: [Neisseria gonorrhoeae] exploits all #4N trees. Gonorrhea\*:ti,ab,kw

#5Gonococc\*:ti,ab,kw

---

#6MeSH descriptor: [Americas] this term only #7MeSH descriptor: [Latin America] all trees explode #8(Latin NEAR/1 America\*):ti,ab,kw  
 #9Latinamerica\*:ti,ab,kw #10Latinamerica\*:ti,ab,kw #11Hispanoamerica\*:ti,ab,kw #12Iberoamerica\*:ti,ab,kw #13(Ibero NEAR/1 Americ\*):ti,ab ,kw #14Panamerican\*:ti,ab,kw  
 #15MeSH descriptor: [Central America] exploit all trees #16(Central NEAR/1 America\*):ti,ab,kw #17Centroamerica\*:ti,ab,kw  
 #18Mesoamerica\*:ti,ab,kw  
 #19(Meso NEAR/1 America\*):ti,ab,kw #20(Middle NEAR/1 America\*):ti,ab,kw  
 #21MeSH descriptor: [South America] explode all trees #22(South NEAR/1 America\*):ti,ab,kw #23Southamerica\*:ti,ab,kw  
 #24Sudamerica\*:ti,ab,kw  
 #25 (America NEAR / 1 South): ti, ab, kw  
 #26MeSH descriptor: [Caribbean Region] all trees explode #27Caribbean: ti, ab, kw  
 #28Caribe\*:ti,ab,kw  
 #29MeSH descriptor: [West Indies] exploit all trees #30(West NEAR/1 Indi\*):ti,ab,kw  
 #31Antill\*:ti,ab,kw  
 #32MeSH descriptor: [Indians, South Americans] exploit all trees #33MeSH descriptor: [Indians, Central Americans] exploit all the trees #34Amerindian\*:ti,ab,kw  
 #35Indians: ti, ab, kw  
 #36 (American NEAR/1 Indian\*):ti,ab,kw #37(Native NEAR/1 Latin\*):ti,ab,kw #38Patagoni\*:ti,ab,kw  
 #39Andes:ti,ab,kw #40Andean\*:ti,ab,kw #41Amazon\*:ti,ab,kw #42Argentin\*:ti,ab,kw #43Bolivia\*:ti,ab,kw #44Brazil\*:ti, ab,kw  
 #45Brazili\*:ti,ab,kw #46Colombia\*:ti,ab,kw #47Chile\*:ti,ab,kw #48Ecuador\*:ti,ab,kw #49Guiana\*:ti,ab,kw #50Guyan \*:ti,ab,kw  
 #51Paraguay\*:ti,ab,kw #52Peru\*:ti,ab,kw #53Suriname\*:ti,ab,kw #54Uruguay\*:ti,ab,kw #55Venez\*:ti,ab ,kw #56Belize\*:ti,ab,k  
 #57(Costa NEAR/1 Ric\*):ti,ab,kw #58Costarric\*:ti,ab,kw #59Costaric\*:ti,ab,kw #60Salvador\*:ti,ab,kw  
 #61Guatemala\*:ti,ab,kw #62Hondur\*:ti,ab,kw #63Nicaragu\*:ti,ab,kw #64Panam\*:ti,ab,kw  
 #65MeSH descriptor: [Mexico] all trees explode #66Mexic\*:ti,ab,kw  
 #67Cuba\*:ti,ab,kw #68Dominic\*:ti,ab,kw #69Haiti\*:ti,ab,kw #70Jamaic\*:ti,ab,kw  
 #71MeSH descriptor: [Puerto Rico] exploit all trees #72(Puerto NEAR/1 Ric\*):ti,ab,kw  
 #73Puertoric\*:ti,ab,kw #74Puertoric\*:ti,ab,kw #75#1 OR #2 OR #3 OR #4 OR #5  
 #76#6 OR #7 OR #8 OR #9 OR #10 OR #11 OR #12 OR #13 OR #14 OR #15 OR #16 OR #17 OR #18 OR #19 OR #20 OR #21 OR  
 #22 OR #23 OR  
 #24 OR #25 OR #26 OR #27 OR #28 OR #29 OR #30 OR #31 OR #32 OR #33 OR #34 OR #35 OR #36 OR #37 OR #38 OR #39  
 OR  
 #40 OR #41 OR #42 OR #43 OR #44 OR #45 OR #46 OR #47 OR #48 OR #49 OR #50 OR #51 OR #52 OR #53 OR #54 OR #55  
 OR  
 #56 OR #57 OR #58 OR #59 OR #60 OR #61 OR #62 OR #63 OR #64 OR #65 OR #66 OR #67 OR #68 OR #69 OR #70 OR #71  
 OR  
 #72 OR #73 OR #74  
 #77#75 and #76 with year of publication from 2011 to 2020, in essays

---

#### 4. ECONLit (EBSCO) 08/31/2020

Limiters S4S1 OR S2 OR S3 - Date of publication: 20110101-20200831 S3TI Gonococc\* OR AB Gonococc\*  
 S2TI N.Gonorrhoea\* OR AB N.Gonorrhoea\* Gonorrhoea S1TI\* OR AB Gonorrhoea\*

---

#### 5. CINAHL (EBSCO) 08/31/2020

Limiters S15S6 AND S14 - Date of publication: 20110101-20200831 S14S7 OR S8 OR S9 OR S10 OR S11 OR S12 OR S13  
 S13AB (Latin NEAR/1 America\*) OR Latinamerica\* OR Latin America\* OR Latin\* OR HISPANIC AMERICANS OR  
 Iberoamerica\* OR (Ibero NEAR/1 Americ\*) OR Panamerican\* OR (Central NEAR/1 America\*) OR Central America\* OR  
 Mesoamerica\* OR (Meso NEAR/1 America\*) OR (Middle NEAR/1 America\*) OR (South NEAR/1 America\*) OR  
 SOUTHAMERICA\* OR Sudamerica\* OR (America NEAR/1 Sur) OR Caribbean OR Caribe\* OR (West NEAR/1 Indi\*) OR Antill\*  
 OR Amerindian\* OR Indians OR (American NEAR/1 Indio\*) OR (Native CERCA/1 America\*) OR Patagoni\* OR Andes OR  
 Andinos\* OR Amazonas\* OR Argentin\* OR Bolivia\* OR Brazil\* OR Brazil\* Colombia\* OR Colombia\* OR Colombia OR Chile\*  
 OR Ecuador\* OR Guyana\* OR Guyan\* OR Guyan\* OR Paraguay\* OR Paraguay\* OR Peru\* OR Suriname\* OR Suriname\* OR  
 Uruguay\* OR Venezuela\* OR Belize\* OR (CLOSE Coast/1 Ric\*) OR Costa Rica\* OR Costa Ric\* OR Costa Ric\* OR Costa Rica\*  
 OR Salvador\* OR Salvador\* OR Guatemala\* OR Guatemala\* OR Guatemala\* OR Guatemala OR Hondur\* OR Nicaragua\* OR  
 Panama\* O Mexic\* O Cuba\* O Dominic\* O Dominic\* O Haiti\* O Jamaic\* O (NEAR Port/ 1 Ric\*) OR Puerto Rican\* OR Puerto  
 Rican\*  
 S12TI (CLOSE Latin/1 America\*) OR Latin America\* OR Latin America\* OR Latin America OR Hispanic America\* OR Ibero  
 America\* OR (Ibero NEAR/1 Americ\*) OR Pan American\* OR (Central NEAR/1 America\*) OR Central America\* OR

---

Mesoamerica\* OR (Meso NEAR/1 America\*) OR (Middle NEAR/1 America\*) OR (South NEAR/1 America\*) OR South America\* OR South America\* OR (NEAR America/1 South) OR Caribbean\* OR (West NEAR/1 Indi\*) OR Antill\* OR Amerindians\* OR Indians OR (Near American/11 Indian\*) OR (Near Near/1 America\*) OR Patagoni\* OR Andes OR Andean\* OR Amazon\* OR Argentin\* OR Bolivia\* OR Brazil\* OR Brazil\* Colombia\* OR Colombia\* OR Colombia OR Chile\* OR Ecuador\* OR Guyana\* OR Guyan\* OR Guyan\* OR Paraguay\* OR Paraguay\* OR Peru\* OR Suriname\* OR Suriname\* OR Uruguay\* OR Venezuela\* OR Belize\* OR (Costa NEAR/1 Ric\*) OR Costa Rica\* OR Costa Ric\* OR Costa Ric\* OR Costarric\* OR Salvador\* OR Salvador\* OR Guatemala\* OR Guatemala\* OR Guatemala\* OR Guatemala OR Hondur\* OR Nicaragua\* OR Panam\* OR Mexic\* O Cuba\* O Dominic\* O Dominic\* O Haiti\* O Jamaic\* O (NEAR Port/1 Ric\*) O Puertorric\* Or Puerto Rican\*

S11(MH "West Indies+") S10(MH "South America+")

S9(MH "Central America+") S8(MH "Latin America") S7(MM "America")

S6S1 OR S2 OR S3 OR S4 OR S5

S5TI Gonococc\* OR AB Gonococc\* S4TI N.Gonorrhoea\* OR AB N.Gonorrhoea\*

S3(MH "Neisserial Infections+") Gonorrhoea S2TI\* OR GONORRHEA AB\* S1 (MH "Gonorrhoea +")

---

## 6. CRD York 08/31/2020

1Recor MESH DESCRIPTOR Gonorrhoea BLOWS UP ALL TREES

2(Gonorrhoea\*)

3MeSH DESCRIPTOR Neisseria gonorrhoeae EXPLOIT ALL TREES 4 (N.Gonorrhoea\*)

5(Gonococc\*)

6#1 O #2 O #3 O #4 O #5

7MeSH DESCRIPTOR Americas

8MESH DESCRIPTOR Latin America EXPLOITS ALL THE TREES

9(Latin America\*) 10(Latin America\*) 11(Latin America\*) 12(Ibero America\*) 13(Ibero America\*) 14(Pan American\*)

15MeSH DESCRIPTOR Central America EXPLOITS ALL THE TREES

16(Central America\*) 17(Central America\*) 18(Mesoamerica\*) 19(Central America\*)

DESCRIPTOR 20MeSH South America EXPLODES ALL THE TREES

21(South America\*) 22(South America\*) 23(South America\*)

24MeSH DESCRIPTOR Caribbean Region EXPLOITS ALL TREES

25(Caribbean) 26(Caribbean\*)

27MeSH DESCRIPTOR WEST INDIES EXPLODE ALL THE TREES

28(West India\*) 29(Antill\*)

30MESH DESCRIPTOR Indians, South American EXPLOIT ALL TREES

31MESH DESCRIPTOR Indians, Central Americans EXPLOIT ALL THE TREES 32(Amerindian\*)

33(American Indian\*) 34(Native America\*) 35(Patagoni\*) 36(Andes) 37(Andean\*) 38(Amazon\*)

39(Argentin\* OR Bolivia\* OR Brazil\* OR Brazil\* Colombia\* OR Colombia\* OR Colombia OR Chile\* OR Ecuador\* OR Guyana\* OR Guyan\* OR Guyan\* OR Paraguay\* OR Paraguay\* OR Peru\* OR Suriname\* OR Suriname\* OR Uruguay\* OR Venezuela\* OR Belize\* OR Costa Ric\* OR Costa Ric\* OR Costa Rica\* OR Costa Ric\* OR Costa Rica\* OR Salvador\* OR Salvador\* OR Salvador\* OR Salvador\* OR Guatemala\* OR Guatemala\* OR Guatemala OR Honduras\* OR Nicaragu\* Panam\* OR Mexic\* OR Cuba\* OR Dominic\* OR Dominic\* OR Haiti\* OR Jamaic\* OR Puerto Ric\* OR Puertorric\* OR Puertoric\*)

40#7 OR #8 OR #9 OR #10 OR #11 OR #12 OR #13 OR #14 OR #15 OR #16 OR #17 OR #18 OR #19 OR #20 OR #21 OR #22 OR #23 OR #24 OR

#25 OR #26 OR #27 OR #28 OR #29 OR #30 OR #31 OR #32 OR #33 OR #34 OR #35 OR #36 OR #37 OR #38 OR #39

41#6 Y #40

---

## 7. LILACS (BVS-ES)

(MH Gonorrhoea[Mesh] OR Gonorrhoea\$ OR Gonorrhoea OR Gonorrhoea OR MH Neisseria Gonorrhoeae OR N.Gonorrhoea\$ OR Gonococ\$) [Words] and 2011 OR 2012 OR 2013 OR 2014 OR 2015 OR 2016 OR 2017 OR 2018 OR 2019 OR 2020 [Country, year of publication]

---

**Supplementary Material Table S2 Studies excluded at full-text review**

| Covidence ID | Study ID             | Reason for exclusion                                         |
|--------------|----------------------|--------------------------------------------------------------|
| 1312         | Abreu 2015           | Duplicate                                                    |
| 1271         | Angel-Muller 2013    | Duplicate                                                    |
| 1260         | Araya 2010           | Duplicate                                                    |
| 1144         | Bristow 2019         | Duplicate                                                    |
| 1021         | Caracas 2014         | Duplicate                                                    |
| 828          | García 2016          | Wrong outcomes (not enough information)                      |
| 600          | Gianecini 2017       | Duplicate                                                    |
| 1086         | Grinsztejn 2018      | Duplicate                                                    |
| 1315         | Ignacio 2017         | Duplicate                                                    |
|              | Korenromp 2018       | Wrong study design (modelling exercise with no primary data) |
| 813          | Mejía 2011           | Wrong outcomes (not enough information)                      |
| 790          | Miranda 2017         | Duplicate                                                    |
| 221          | Qquellon 2019        | Wrong outcomes (not enough information)                      |
| 219          | Quimbert Montes 2013 | Wrong design (case report)                                   |
| 126          | Sanchez 2013         | Duplicate                                                    |
| 97           | Serván-Mori 2013     | Wrong outcomes                                               |
| 40           | Starmino 2012        | Wrong setting                                                |
| 3            | Teglia 2016          | Wrong outcomes (not enough information)                      |
| 392          | Tinajeros 2011       | Wrong outcomes (not enough information)                      |
| 381          | Tosato Boldrini 2021 | Duplicate                                                    |
| 339          | Veloso 2018          | Duplicate                                                    |
| 336          | Vera 2012            | Duplicate                                                    |
| 273          | Zia 2018             | Duplicate                                                    |

**Supplementary Material Table S3 Characteristics of included studies**

| Author and year of publication       | Publication type | Country | Source type  | Sampling type               | Study start date (dd/mm/yy) | Study end date (dd/mm/yy) | Study duration (months) | Study design <sup>a</sup> |
|--------------------------------------|------------------|---------|--------------|-----------------------------|-----------------------------|---------------------------|-------------------------|---------------------------|
| Adachi 2015 <sup>25</sup>            | Full text        | Brazil  | Hospitalised | Convenience (health system) | 1/4/2004                    | 31/7/2010                 | 76                      | Cross-sectional           |
| Alcántara 2019 <sup>26</sup>         | Abstract         | Brazil  | NR           | Convenience (health system) | 1/1/2010                    | 31/12/2018                | 108                     | Cross-sectional           |
| Allan-Blitz 2018 <sup>27</sup>       | Full text        | Peru    | Ambulatory   | Convenience (health system) | 1/6/2013                    | 31/7/2016                 | 38                      | Cohort study              |
| Andrade 2020 <sup>28</sup>           | Full text        | Brazil  | Ambulatory   | Convenience (community)     | 1/1/2015                    | 30/4/2017                 | 28                      | Cross-sectional           |
| Baldin-DalPogetto 2011 <sup>29</sup> | Full text        | Brazil  | Ambulatory   | Convenience (community)     | 1/8/2008                    | 31/3/2009                 | 8                       | Cross-sectional           |
| Barbosa 2011 <sup>30</sup>           | Abstract         | Brazil  | NR           | Convenience (health system) | 1/1/2005                    | 31/12/2005                | 12                      | Cross-sectional           |
| Bastos 2019 <sup>31</sup>            | Abstract         | Brazil  | Hospitalised | Convenience (health system) | 1/1/2009                    | 31/12/2019                | 132                     | Case series               |
| Bazzi 2015 <sup>32</sup>             | Full text        | Mexico  | Ambulatory   | Convenience (community)     | 1/1/2010                    | 31/12/2013                | 48                      | Cohort study              |
| Benzaken 2012 <sup>33</sup>          | Full text        | Brazil  | Ambulatory   | Convenience (health system) | 1/2/2009                    | 31/7/2009                 | 6                       | Cross-sectional           |
| Boldrini 2018 <sup>34</sup>          | Full text        | Brazil  | Ambulatory   | Convenience (health system) | 1/2/2014                    | 31/10/2015                | 21                      | Cross-sectional           |
| Bristow 2021 <sup>35</sup>           | Full text        | Mexico  | Ambulatory   | Convenience (community)     | 1/2/2017                    | 30/11/2018                | 22                      | Cross-sectional           |
| Bristow 2017 <sup>36</sup>           | Abstract         | Mexico  | Ambulatory   | NR                          | NR                          | NR                        | NR                      | Cross-sectional           |
| Bristow 2014 <sup>37</sup>           | Full text        | Haiti   | Ambulatory   | Convenience (health system) | 1/3/2013                    | 31/3/2013                 | 1                       | Cross-sectional           |
| Bristow 2017 <sup>a38</sup>          | Full text        | Haiti   | Ambulatory   | Convenience (health system) | 26/10/2015                  | 14/1/2016                 | 3                       | Cross-sectional           |

|                                   |           |             |              |                                      |           |            |    |                                    |
|-----------------------------------|-----------|-------------|--------------|--------------------------------------|-----------|------------|----|------------------------------------|
| Burgos 2010 <sup>139</sup>        | Full text | Mexico      | Ambulatory   | NR                                   | NR        | NR         | NR | Economic evaluation                |
| Cabeza 2015 <sup>39</sup>         | Abstract  | Peru        | Ambulatory   | Convenience (health system)          | 1/10/2012 | 1/7/2014   | 30 | Cross-sectional                    |
| Cáceres-Burton 2012 <sup>40</sup> | Other     | Chile       | NR           | Convenience (health system)          | 1/1/2011  | 31/12/2011 | 12 | Epidemiological surveillance study |
| Cáceres-Burton 2019 <sup>41</sup> | Other     | Chile       | NR           | Convenience (health system)          | 1/1/2013  | 31/12/2017 | 60 | Epidemiological surveillance study |
| Cáceres-Burton 2018 <sup>42</sup> | Other     | Chile       | NR           | Convenience (health system)          | 1/1/2012  | 31/12/2012 | 12 | Epidemiological surveillance study |
| Campos 2015 <sup>43</sup>         | Full text | Brazil      | Ambulatory   | Convenience (health system)          | 1/5/2011  | 31/1/2012  | 9  | Cross-sectional                    |
| Campos 2013 <sup>44</sup>         | Full text | Peru        | Ambulatory   | Convenience (community)              | 1/11/2002 | 31/12/2006 | 50 | Cross-sectional                    |
| Cárcamo 2012 <sup>45</sup>        | Full text | Peru        | Ambulatory   | Randomised representative            | 15/8/2002 | 15/11/2002 | 3  | Cross-sectional                    |
| Cardona Arango 2012 <sup>46</sup> | Full text | Colombia    | Ambulatory   | Convenience (health system)          | 1/1/2002  | 31/12/2006 | 60 | Cross-sectional                    |
| Casco 2011 <sup>47</sup>          | Full text | Argentina   | Ambulatory   | Convenience (health system)          | 1/1/2005  | 30/12/2009 | 60 | Cross-sectional                    |
| Casillas-Vega 2016 <sup>48</sup>  | Full text | Mexico      | Ambulatory   | Convenience (health system)          | 1/9/2013  | 1/8/2014   | 11 | Cross-sectional                    |
| Castillo 2015 <sup>49</sup>       | Full text | Peru        | Ambulatory   | Convenience (community)              | 1/3/2008  | NR         | NR | Cohort study                       |
| Chacón-Cruz 2018 <sup>50</sup>    | Abstract  | Mexico      | Hospitalised | Convenience (health system)          | 1/1/2012  | 31/12/2017 | 72 | Epidemiological surveillance study |
| Christofolini 2012 <sup>51</sup>  | Full text | Brazil      | Ambulatory   | Convenience (health system)          | NR        | NR         | NR | Cross-sectional                    |
| Clark 2017 <sup>52</sup>          | Full text | Peru        | Ambulatory   | Convenience (community and patients) | 1/10/2012 | 31/7/2014  | 22 | Cross-sectional                    |
| Creswell 2012 <sup>53</sup>       | Full text | El Salvador | Ambulatory   | Convenience (health system)          | 1/3/2008  | 30/9/2008  | 7  | Cross-sectional                    |
| Cunha 2015 <sup>24</sup>          | Full text | Brazil      | Ambulatory   | Convenience (health system)          | 2/8/2010  | 30/6/2012  | 23 | Cross-sectional                    |

|                                     |           |                     |            |                                      |            |            |    |                 |
|-------------------------------------|-----------|---------------------|------------|--------------------------------------|------------|------------|----|-----------------|
| da Silva 2018 <sup>54</sup>         | Full text | Brazil              | Ambulatory | Convenience (health system)          | 1/2/2018   | 31/3/2018  | 2  | Cross-sectional |
| de Abreu 2016 <sup>55</sup>         | Full text | Brazil              | Ambulatory | Convenience (health system)          | 1/8/2012   | 31/3/2013  | 8  | Cross-sectional |
| de Lima 2014 <sup>56</sup>          | Full text | Brazil              | Ambulatory | Convenience (health system)          | 1/1/2007   | 31/12/2009 | 36 | Cross-sectional |
| de Menezes Filho 2017 <sup>57</sup> | Full text | Brazil              | Ambulatory | Convenience (health system)          | 1/1/2013   | 31/12/2013 | 12 | Cross-sectional |
| Detels 2011 <sup>58</sup>           | Full text | Peru                | Ambulatory | Convenience (community)              | NR         | NR         | NR | Cohort study    |
| Downey 2015 <sup>59</sup>           | Full text | Haiti               | Ambulatory | Convenience (health system)          | 21/10/2013 | 27/10/2013 | 0  | Cross-sectional |
| Duncan 2014 <sup>60</sup>           | Full text | Jamaica             | Ambulatory | Convenience (community)              | 1/8/2008   | 1/11/2008  | 3  | Cross-sectional |
| Edwards 2019 <sup>61</sup>          | Full text | Trinidad and Tobago | NR         | Convenience (health system)          | 1/1/2012   | 31/12/2012 | 12 | Cross-sectional |
| Edwards 2019 <sup>a62</sup>         | Full text | Trinidad and Tobago | Ambulatory | Convenience (health system)          | 1/4/2014   | 30/9/2014  | 6  | Cross-sectional |
| Fernandes 2014 <sup>63</sup>        | Full text | Brazil              | Ambulatory | Convenience (health system)          | 1/1/2009   | 31/12/2012 | 48 | Cross-sectional |
| Figueroa 2012 <sup>64</sup>         | Full text | Jamaica             | Ambulatory | Convenience (community)              | 1/3/2007   | 31/1/2008  | 11 | Cross-sectional |
| Gabster 2019a <sup>65</sup>         | Abstract  | Panama              | Ambulatory | Randomised representative            | 1/1/2015   | 1/1/2018   | 36 | Cross-sectional |
| Gabster 2019b <sup>66</sup>         | Full text | Panama              | Ambulatory | Randomised representative            | 1/7/2018   | 30/11/2018 | 5  | Cross-sectional |
| Galárraga 2014 <sup>67</sup>        | Full text | Mexico              | Ambulatory | Convenience (community and patients) | NR         | NR         | NR | Cross-sectional |
| Ganley 2016 <sup>68</sup>           | Full text | Mexico              | Ambulatory | Convenience (community)              | 1/1/2012   | 31/5/2014  | 29 | Cohort study    |
| García 2018 <sup>69</sup>           | Full text | Guatemala           | Ambulatory | Convenience (health system)          | 1/1/2005   | 31/12/2012 | 96 | Cross-sectional |



|                                       |           |                                             |            |                             |           |            |     |                                    |
|---------------------------------------|-----------|---------------------------------------------|------------|-----------------------------|-----------|------------|-----|------------------------------------|
| García 2017 <sup>70</sup>             | Full text | Peru                                        | Ambulatory | Convenience (community)     | 1/8/2014  | 30/9/2014  | 2   | Cross-sectional                    |
| García-González 2017 <sup>71</sup>    | Full text | Mexico                                      | Ambulatory | Convenience (health system) | 1/5/2013  | 31/7/2015  | 27  | Cross-sectional                    |
| Goins 2011 <sup>72</sup>              | Abstract  | Nicaragua                                   | Ambulatory | Convenience (health system) | NR        | NR         | NR  | Cross-sectional                    |
| González 2014 <sup>73</sup>           | Abstract  | Argentina                                   | Ambulatory | Convenience (health system) | 1/12/2012 | 31/1/2014  | 14  | Cross-sectional                    |
| Grinsztejn 2017 <sup>74</sup>         | Full text | Brazil                                      | Ambulatory | Convenience (community)     | 1/8/2015  | 29/1/2016  | 6   | Cross-sectional                    |
| Gutiérrez-Sandi 2016 <sup>75</sup>    | Full text | Costa Rica                                  | Ambulatory | Convenience (health system) | 1/1/2002  | 31/5/2012  | 125 | Epidemiological surveillance study |
| Ham 2014 <sup>76</sup>                | Abstract  | El Salvador                                 | NR         | Convenience (community)     | NR        | NR         | NR  | Cross-sectional                    |
| Ham 2015 <sup>77</sup>                | Abstract  | El Salvador, Nicaragua, Guatemala, Honduras | Ambulatory | Convenience (community)     | 1/1/2007  | 31/12/2012 | 72  | Cross-sectional                    |
| Hernández 2011 <sup>78</sup>          | Abstract  | Nicaragua                                   | NR         | Convenience (community)     | 1/9/2009  | 28/2/2010  | 6   | Cross-sectional                    |
| Hernández-Martínez 2013 <sup>79</sup> | Full text | Mexico                                      | Ambulatory | Convenience (community)     | NR        | NR         | NR  | Cross-sectional                    |
| Hoagland 2015 <sup>80</sup>           | Full text | Brazil                                      | Ambulatory | Convenience (health system) | 1/4/2014  | 24/8/2015  | 17  | Cross-sectional                    |
| Hobbs 2011 <sup>81</sup>              | Abstract  | Jamaica                                     | Ambulatory | Convenience (health system) | 1/8/2010  | 31/1/2011  | 6   | Cohort study                       |
| Huneus 2018 <sup>82</sup>             | Full text | Chile                                       | Ambulatory | Convenience (health system) | NR        | NR         | NR  | Cross-sectional                    |
| Jean Louis 2020 <sup>83</sup>         | Full text | Haiti                                       | Ambulatory | Convenience (health system) | 1/9/2018  | 31/7/2019  | 11  | Cross-sectional                    |
| Lima 2018 <sup>84</sup>               | Full text | Brazil                                      | Ambulatory | Convenience (health system) | 1/3/2014  | 30/9/2015  | 19  | Cross-sectional                    |
| Luchiari 2016 <sup>85</sup>           | Full text | Brazil                                      | Ambulatory | Convenience (health system) | 1/9/2012  | 31/10/2013 | 14  | Cross-sectional                    |

|                                         |           |               |            |                             |          |            |    |                 |
|-----------------------------------------|-----------|---------------|------------|-----------------------------|----------|------------|----|-----------------|
| Luppi 2011 <sup>86</sup>                | Full text | Brazil        | Ambulatory | Convenience (health system) | 1/4/2004 | 31/3/2005  | 12 | Cross-sectional |
| Manca 2020 <sup>87</sup>                | Full text | French Guiana | Ambulatory | Convenience (health system) | 1/2/2017 | 31/12/2017 | 11 | Cross-sectional |
| Marchezini 2018 <sup>88</sup>           | Full text | Brazil        | Ambulatory | Convenience (health system) | 1/1/2013 | 31/12/2015 | 36 | Cross-sectional |
| Melo 2019 <sup>89</sup>                 | Full text | Brazil        | Ambulatory | Convenience (health system) | 2/2/2014 | 9/12/2016  | 34 | Cohort study    |
| Mendizábal-Burastero 2015 <sup>90</sup> | Abstract  | Guatemala     | Ambulatory | Convenience (health system) | 1/6/2014 | 31/12/2014 | 7  | Cross-sectional |
| Mendoza 2013 <sup>91</sup>              | Full text | Paraguay      | Ambulatory | Convenience (health system) | NR       | NR         | NR | Cross-sectional |
| Miranda 2017 <sup>92</sup>              | Full text | Brazil        | Ambulatory | Convenience (health system) | 1/3/2015 | 31/12/2015 | 10 | Cross-sectional |
| Montano 2020 <sup>93</sup>              | Full text | Peru          | Ambulatory | Convenience (health system) | 1/1/2013 | 31/12/2017 | 60 | Cohort study    |
| Morales-Miranda 2013 <sup>94</sup>      | Abstract  | Belize        | Ambulatory | Convenience (health system) | 1/1/2012 | 31/7/2012  | 7  | Cross-sectional |
| Morales-Miranda 2013 <sup>95</sup>      | Abstract  | Belize        | Ambulatory | Convenience (health system) | 1/1/2012 | 31/12/2012 | 12 | Cross-sectional |
| Moriarty 2019 <sup>96</sup>             | Full text | Peru          | Ambulatory | NR                          | 1/6/2017 | 31/12/2017 | 7  | Cross-sectional |
| Mucci 2016 <sup>98</sup>                | Full text | Argentina     | NR         | Convenience (health system) | 1/8/2012 | 31/1/2013  | 6  | Cross-sectional |
| Núñez-Forero 2012 <sup>97</sup>         | Full text | Colombia      | Ambulatory | Convenience (health system) | 1/1/2010 | 31/12/2010 | 12 | Cross-sectional |
| Occhionero 2018 <sup>99</sup>           | Full text | Argentina     | Ambulatory | Convenience (health system) | NR       | NR         | NR | Cross-sectional |
| Ovalle 2012 <sup>100</sup>              | Full text | Chile         | Ambulatory | Convenience (health system) | 1/4/2010 | 31/10/2011 | 19 | Cross-sectional |
| Pantoja 2012 <sup>101</sup>             | Full text | Brazil        | Ambulatory | Convenience (health system) | 1/4/2008 | 31/10/2009 | 19 | Cross-sectional |
| Paredes 2015 <sup>102</sup>             | Full text | Colombia      | Ambulatory | Randomised representative   | NR       | NR         | NR | Cross-sectional |

|                                  |           |             |            |                                      |           |            |     |                 |
|----------------------------------|-----------|-------------|------------|--------------------------------------|-----------|------------|-----|-----------------|
| Passaro 2018 <sup>103</sup>      | Full text | Peru        | Ambulatory | Convenience (community and patients) | 1/8/2012  | 30/6/2014  | 23  | Cross-sectional |
| Patterson 2019 <sup>104</sup>    | Full text | Mexico      | Ambulatory | Convenience (community)              | 1/1/2011  | 31/12/2015 | 60  | Cross-sectional |
| Paz-Bailey 2012 <sup>105</sup>   | Full text | El Salvador | Ambulatory | Convenience (health system)          | 1/3/2008  | 30/9/2008  | 7   | Cross-sectional |
| Peña-Toribio 2019 <sup>106</sup> | Abstract  | Mexico      | Ambulatory | Convenience (health system)          | 1/1/2018  | 1/1/2019   | 12  | Cross-sectional |
| Pérez-Brumer 2013 <sup>107</sup> | Full text | Peru        | Ambulatory | Convenience (community and patients) | 1/5/2007  | 31/12/2007 | 8   | Cross-sectional |
| Piazzetta 2011 <sup>108</sup>    | Full text | Brazil      | Ambulatory | Convenience (health system)          | NR        | NR         | NR  | Cross-sectional |
| Pinto 2011 <sup>109</sup>        | Full text | Brazil      | NR         | Randomised representative            | 1/3/2009  | 30/11/2009 | 9   | Cross-sectional |
| Pinto 2016 <sup>110</sup>        | Full text | Brazil      | NR         | Convenience (health system)          | 1/10/2013 | 31/3/2014  | 6   | Cross-sectional |
| Piscopo 2018 <sup>111</sup>      | Abstract  | Brazil      | Ambulatory | Convenience (health system)          | 1/1/2016  | 31/12/2017 | 24  | Cross-sectional |
| Pollett 2013 <sup>112</sup>      | Full text | Peru        | Ambulatory | Convenience (health system)          | 1/11/2008 | 31/1/2011  | 27  | Cross-sectional |
| Rahman 2015 <sup>113</sup>       | Full text | Argentina   | Ambulatory | Convenience (health system)          | 1/1/2003  | 31/12/2013 | 132 | Cross-sectional |
| Reyes 2020 <sup>114</sup>        | Full text | Chile       | Ambulatory | Convenience (health system)          | 1/6/2013  | 31/12/2013 | 7   | Cross-sectional |
| Ribas 2011 <sup>115</sup>        | Full text | Brazil      | Ambulatory | Convenience (health system)          | 1/1/2003  | 30/12/2007 | 60  | Cross-sectional |
| Rocha 2014 <sup>116</sup>        | Full text | Brazil      | Ambulatory | Convenience (health system)          | 1/5/2010  | 30/11/2010 | 7   | Cross-sectional |
| Rodrigues 2019 <sup>117</sup>    | Full text | Brazil      | Ambulatory | Convenience (health system)          | 1/8/2015  | 31/7/2016  | 12  | Cross-sectional |
| Rodrigues 2011 <sup>118</sup>    | Full text | Brazil      | Ambulatory | Convenience (health system)          | 1/1/2005  | 31/12/2005 | 12  | Cross-sectional |

|                                      |           |                      |            |                             |           |            |    |                                    |
|--------------------------------------|-----------|----------------------|------------|-----------------------------|-----------|------------|----|------------------------------------|
| Rodríguez 2018 2020 <sup>119</sup>   | Full text | Cuba                 | NR         | Convenience (health system) | 1/6/2018  | 30/6/2018  | 1  | Epidemiological surveillance study |
| Rojas 2012 <sup>120</sup>            | Full text | Colombia             | NR         | Convenience (health system) | 1/1/2005  | 31/12/2009 | 60 | Cross-sectional                    |
| Sabidó 2011 <sup>121</sup>           | Full text | Guatemala            | Ambulatory | Convenience (health system) | 1/1/2008  | 31/12/2009 | 24 | Cross-sectional                    |
| Sánchez Palencia 2017 <sup>122</sup> | Full text | Peru                 | NR         | Convenience (health system) | 1/1/2012  | 31/12/2013 | 24 | Cross-sectional                    |
| Scheidell 2018 <sup>123</sup>        | Full text | Haiti                | Ambulatory | Convenience (health system) | 1/8/2013  | 31/10/2013 | 3  | Cross-sectional                    |
| Scheidell 2016 <sup>124</sup>        | Abstract  | Haiti                | NR         | Convenience (health system) | NR        | NR         | NR | Cross-sectional                    |
| Silveira 2020 <sup>125</sup>         | Full text | Brazil               | Ambulatory | Convenience (health system) | 1/8/2015  | 31/12/2016 | 17 | Cross-sectional                    |
| Snead 2017 <sup>126</sup>            | Full text | Jamaica              | Ambulatory | Convenience (health system) | 1/9/2012  | 31/1/2014  | 17 | Cross-sectional                    |
| Souza 2013 <sup>127</sup>            | Full text | Brazil               | Ambulatory | Convenience (health system) | 1/4/2011  | 31/5/2012  | 14 | Cross-sectional                    |
| Strathdee 2011 <sup>128</sup>        | Full text | Mexico               | Ambulatory | Convenience (community)     | 1/10/2008 | 31/10/2009 | 13 | Cross-sectional                    |
| Tinajeros 2012 <sup>129</sup>        | Full text | Honduras             | Ambulatory | Convenience (health system) | 1/3/2006  | 31/12/2008 | 36 | Cross-sectional                    |
| Travassos 2016 <sup>130</sup>        | Full text | Brazil               | Ambulatory | Convenience (health system) | 1/6/2013  | 31/5/2015  | 24 | Cross-sectional                    |
| Veloso 2020 <sup>131</sup>           | Abstract  | Brazil, Mexico, Peru | Ambulatory | Convenience (health system) | 1/2/2018  | 30/11/2019 | 22 | Cross-sectional                    |
| Villarán 2013 <sup>132</sup>         | Abstract  | Peru                 | NR         | Convenience (health system) | 1/1/2012  | 31/12/2012 | 12 | Cross-sectional                    |
| Villegas 2018 <sup>133</sup>         | Abstract  | Colombia             | NR         | NR                          | NR        | NR         | NR | Cross-sectional                    |
| Villegas-Castaño 2016 <sup>134</sup> | Full text | Colombia             | Ambulatory | Randomised representative   | 1/1/2010  | 31/12/2013 | 48 | Cross-sectional                    |
| Weir 2015 <sup>135</sup>             | Full text | Jamaica              | Ambulatory | Convenience (community)     | NR        | NR         | NR | Cross-sectional                    |

|                                 |           |           |            |                             |          |            |    |                 |
|---------------------------------|-----------|-----------|------------|-----------------------------|----------|------------|----|-----------------|
| Wohlmeister 2016 <sup>136</sup> | Full text | Brazil    | Ambulatory | Convenience (health system) | 1/3/2014 | 30/11/2014 | 9  | Cross-sectional |
| Yeganeh 2021 <sup>137</sup>     | Full text | Brazil    | Ambulatory | Convenience (health system) | 1/9/2018 | 31/10/2019 | 14 | Cross-sectional |
| Zotta 2014 <sup>138</sup>       | Full text | Argentina | Ambulatory | Convenience (health system) | 1/1/2005 | 31/12/2010 | 72 | Cross-sectional |

NR, Not reported

<sup>a</sup>There were 100 cross-sectional studies (two were designed as randomised controlled trials, but for the purpose of this analysis the control arms were considered to be cross-sectional studies), 8 cohort studies, 6 epidemiological surveillance studies, 1 case series, and 1 economic evaluation. Six studies had randomised sampling and 106 had convenience sampling, 83 of which involved patients receiving medical care. Of the 23 studies with convenience sampling including individuals outside the health system, 19 predominantly recruited high-risk groups. Of the six studies with randomised sampling, one represented the general population<sup>45</sup> and five represented specific populations such as pregnant women or adolescent students.

.;b=:

**0.**

**Supplementary Material Table S4 Risk of bias assessment for cross-sectional and cohort studies**

| Author and year of publication       | 1   | 2   | 3   | 4   | 5   | 6   | 7   | 8  | 9   | 10  | 11  | 12 | 13  | 14  | Quality rating |
|--------------------------------------|-----|-----|-----|-----|-----|-----|-----|----|-----|-----|-----|----|-----|-----|----------------|
| Adacchi 2015 <sup>1</sup>            | Yes | Yes | No  | Yes | No  | No  | NA  | NA | Yes | NA  | Yes | NA | NA  | Yes | FAIR           |
| Alcántara 2019 <sup>2</sup>          | Yes | Yes | No  | Yes | NA  | NA  | NA  | NA | NA  | NA  | NR  | NA | NA  | NA  | FAIR           |
| Allan-Blitz 2018 <sup>3</sup>        | Yes | Yes | No  | Yes | No  | Yes | Yes | NA | Yes | Yes | Yes | NA | Yes | Yes | FAIR           |
| Andrade 2020 <sup>4</sup>            | Yes | Yes | No  | Yes | No  | No  | NA  | NA | Yes | NA  | Yes | NA | NA  | Yes | FAIR           |
| Baldin-Dal Pogetto 2011 <sup>5</sup> | Yes | Yes | No  | Yes | NA  | NA  | NA  | NA | NA  | NA  | Yes | NA | NA  | NA  | FAIR           |
| Barbosa 2011 <sup>6</sup>            | Yes | Yes | No  | NR  | No  | No  | NA  | NA | CD  | NA  | Yes | NA | NA  | No  | POOR           |
| Bazzi 2015 <sup>7</sup>              | Yes | Yes | No  | Yes | No  | Yes | Yes | NA | Yes | Yes | Yes | NA | No  | Yes | FAIR           |
| Benzaken 2012 <sup>8</sup>           | Yes | Yes | No  | Yes | Yes | NA  | NA  | NA | Yes | NA  | Yes | NA | NA  | Yes | FAIR           |
| Boldrini 2018 <sup>9</sup>           | Yes | Yes | No  | Yes | No  | No  | NA  | NA | Yes | NA  | Yes | NA | NA  | No  | POOR           |
| Bristow 2014 <sup>10</sup>           | Yes | Yes | No  | Yes | No  | No  | NA  | NA | Yes | NA  | Yes | NA | NA  | No  | POOR           |
| Bristow 2017 <sup>11</sup>           | Yes | No  | NA  | CD  | No  | No  | NA  | NA | Yes | NA  | Yes | NA | NA  | No  | POOR           |
| Bristow 2017 <sup>a11</sup>          | Yes | Yes | No  | Yes | NA  | NA  | NA  | NA | NA  | NA  | Yes | NA | NA  | NA  | FAIR           |
| Bristow 2021 <sup>12</sup>           | Yes | Yes | No  | Yes | No  | No  | NA  | NA | Yes | NA  | Yes | NA | NA  | No  | POOR           |
| Cabeza 2015 <sup>13</sup>            | Yes | Yes | No  | Yes | No  | NA  | NA  | NA | Yes | NA  | Yes | NA | NA  | No  | POOR           |
| Campos 2013 <sup>14</sup>            | Yes | Yes | CD  | Yes | No  | No  | NA  | NA | Yes | NA  | Yes | NA | NA  | Yes | FAIR           |
| Campos 2015 <sup>15</sup>            | Yes | Yes | No  | Yes | No  | No  | NA  | NA | Yes | NA  | Yes | NA | NA  | Yes | FAIR           |
| Cárcamo 2012 <sup>16</sup>           | Yes | Yes | Yes | Yes | No  | No  | NA  | NA | Yes | NA  | Yes | NA | NA  | Yes | GOOD           |
| Cardona Arango 2012 <sup>17</sup>    | Yes | Yes | NA  | Yes | NA  | NA  | NA  | NA | NA  | NA  | CD  | NA | NA  | NA  | FAIR           |
| Casco 2011 <sup>18</sup>             | Yes | Yes | No  | Yes | No  | No  | NA  | NA | Yes | NA  | Yes | NA | NA  | No  | POOR           |
| Casillas-Vega 2016 <sup>19</sup>     | Yes | Yes | No  | Yes | NA  | NA  | NA  | NA | NA  | NA  | Yes | NA | NA  | Yes | FAIR           |
| Castillo 2015 <sup>20</sup>          | Yes | Yes | No  | Yes | No  | Yes | Yes | NA | Yes | Yes | Yes | NA | Yes | Yes | FAIR           |

| Author and year of publication      | 1   | 2   | 3   | 4   | 5   | 6   | 7   | 8  | 9   | 10  | 11  | 12 | 13  | 14  | Quality rating |
|-------------------------------------|-----|-----|-----|-----|-----|-----|-----|----|-----|-----|-----|----|-----|-----|----------------|
| Chacón-Cruz 2018 <sup>21</sup>      | Yes | Yes | NA  | Yes | NA  | NA  | NA  | NA | NA  | NA  | NA  | NA | NA  | NA  | GOOD           |
| Christofolini 2012 <sup>22</sup>    | Yes | Yes | No  | Yes | NA  | NA  | NA  | NA | Yes | NA  | Yes | NA | NA  | Yes | FAIR           |
| Clark 2017 <sup>23</sup>            | Yes | Yes | No  | Yes | Yes | No  | NA  | NA | Yes | NA  | Yes | NA | NA  | NA  | FAIR           |
| Creswell 2012 <sup>24</sup>         | Yes | Yes | No  | Yes | Yes | Yes | NA  | NA | Yes | NA  | Yes | NA | NA  | Yes | FAIR           |
| Cunha 2015 <sup>25</sup>            | Yes | Yes | No  | Yes | No  | No  | NA  | NA | Yes | NA  | Yes | NR | NA  | Yes | FAIR           |
| da Silva 2018 <sup>26</sup>         | Yes | Yes | No  | Yes | No  | No  | NA  | NA | Yes | NA  | Yes | NA | NA  | Yes | FAIR           |
| de Abreu 2016 <sup>27</sup>         | Yes | Yes | No  | Yes | No  | NA  | NA  | NA | Yes | NA  | Yes | NA | NA  | Yes | FAIR           |
| de Lima 2014 <sup>28</sup>          | Yes | Yes | No  | Yes | Yes | No  | NA  | NA | Yes | NA  | Yes | NA | NA  | Yes | FAIR           |
| de Menezes Filho 2017 <sup>29</sup> | Yes | Yes | No  | Yes | No  | No  | Yes | NA | Yes | NA  | Yes | NA | Yes | Yes | FAIR           |
| Detels 2011 <sup>30</sup>           | Yes | Yes | No  | CD  | No  | Yes | Yes | NA | Yes | Yes | Yes | NA | No  | Yes | FAIR           |
| Downey 2015 <sup>31</sup>           | Yes | Yes | No  | Yes | No  | Yes | NA  | NA | Yes | NA  | Yes | NA | NA  | Yes | FAIR           |
| Duncan 2014 <sup>32</sup>           | Yes | Yes | No  | Yes | No  | NA  | NA  | NA | NA  | NA  | Yes | NA | NA  | NA  | FAIR           |
| Edwards 2019 <sup>33</sup>          | Yes | Yes | No  | Yes | No  | No  | NA  | NA | Yes | NA  | Yes | NA | NA  | Yes | FAIR           |
| Edwards 2019a <sup>33</sup>         | Yes | Yes | No  | Yes | No  | No  | NA  | NA | Yes | NA  | Yes | NA | NA  | Yes | FAIR           |
| Fernandes 2014 <sup>34</sup>        | Yes | Yes | No  | Yes | Yes | No  | NA  | NA | Yes | NA  | Yes | NA | NA  | NA  | FAIR           |
| Figueroa 2012 <sup>35</sup>         | Yes | Yes | No  | Yes | No  | No  | NA  | NA | Yes | NA  | Yes | NA | NA  | Yes | FAIR           |
| Gabster 2019a <sup>36</sup>         | Yes | Yes | Yes | Yes | No  | No  | NA  | NA | Yes | NA  | Yes | NA | NA  | Yes | GOOD           |

| Author and year of publication     | 1   | 2   | 3   | 4   | 5   | 6   | 7   | 8  | 9   | 10  | 11  | 12 | 13  | 14  | Quality rating |
|------------------------------------|-----|-----|-----|-----|-----|-----|-----|----|-----|-----|-----|----|-----|-----|----------------|
| Gabster 2019b <sup>36</sup>        | Yes | Yes | Yes | Yes | Yes | NA  | NA  | NA | Yes | NA  | Yes | NA | NA  | Yes | GOOD           |
| Galárraga 2014 <sup>37</sup>       | Yes | Yes | No  | Yes | No  | No  | NA  | NA | Yes | NA  | Yes | NA | NA  | NA  | FAIR           |
| Ganley 2016 <sup>38</sup>          | Yes | Yes | No  | Yes | No  | Yes | Yes | NA | Yes | Yes | Yes | NA | Yes | Yes | FAIR           |
| García 2017 <sup>39</sup>          | Yes | Yes | No  | Yes | Yes | NA  | NA  | NA | NA  | NA  | Yes | NA | NA  | NA  | FAIR           |
| García 2018 <sup>40</sup>          | Yes | Yes | No  | Yes | No  | No  | NA  | NA | Yes | NA  | Yes | NA | NA  | Yes | FAIR           |
| García-González 2017 <sup>41</sup> | Yes | No  | No  | Yes | No  | No  | NA  | NA | Yes | NA  | Yes | NA | NA  | No  | POOR           |
| Goins 2011 <sup>42</sup>           | No  | Yes | No  | Yes | No  | No  | NA  | NA | Yes | NA  | No  | NA | NA  | No  | POOR           |
| González 2014 <sup>43</sup>        | Yes | Yes | No  | Yes | NA  | NA  | NA  | NA | NA  | NA  | Yes | NA | NA  | NA  | FAIR           |
| Grinsztejn 2017 <sup>44</sup>      | Yes | Yes | No  | Yes | Yes | No  | NA  | NA | Yes | NA  | Yes | NA | NA  | Yes | FAIR           |
| Gutiérrez-Sandí <sup>45</sup>      | Yes | No  | CD  | CD  | NA  | NA  | NA  | NA | NA  | NA  | No  | NA | NA  | NA  | POOR           |
| Ham 2014 <sup>46</sup>             | Yes | Yes | No  | NR  | No  | No  | NA  | NA | Yes | NA  | Yes | NA | NA  | Yes | FAIR           |
| Ham 2015 <sup>31</sup>             | Yes | No  | NA  | CD  | No  | NA  | NA  | NA | Yes | NA  | Yes | NA | NA  | NA  | FAIR           |



| Author and year of publication        | 1   | 2   | 3  | 4   | 5  | 6   | 7   | 8   | 9   | 10  | 11  | 12 | 13 | 14  | Quality rating |
|---------------------------------------|-----|-----|----|-----|----|-----|-----|-----|-----|-----|-----|----|----|-----|----------------|
| Hernández 2011 <sup>47</sup>          | Yes | Yes | No | NR  | NA | NA  | NA  | NA  | NA  | NA  | Yes | NA | NA | NA  | FAIR           |
| Hernández-Martínez 2013 <sup>48</sup> | Yes | Yes | No | CD  | No | No  | NA  | NA  | CD  | NA  | Yes | NA | NA | No  | POOR           |
| Hoagland 2015 <sup>49</sup>           | Yes | Yes | No | Yes | No | No  | NA  | NA  | Yes | NA  | Yes | NA | NA | Yes | FAIR           |
| Hobbs 2011 <sup>50</sup>              | Yes | Yes | No | Yes | No | Yes | Yes | NA  | Yes | No  | Yes | NA | CD | No  | POOR           |
| Huneus 2018 <sup>51</sup>             | Yes | Yes | No | CD  | No | Yes | NA  | NA  | Yes | No  | Yes | NA | NA | Yes | FAIR           |
| Jean Louis 2020 <sup>52</sup>         | Yes | Yes | No | Yes | No | No  | NA  | NA  | Yes | No  | Yes | NA | NA | Yes | FAIR           |
| Lima 2018 <sup>53</sup>               | Yes | No  | No | Yes | No | No  | NA  | NA  | Yes | NA  | Yes | NA | NA | Yes | POOR           |
| Luchiari 2016 <sup>54</sup>           | Yes | Yes | No | Yes | No | No  | NA  | NA  | Yes | NA  | Yes | NA | NA | No  | POOR           |
| Luppi 2011 <sup>55</sup>              | Yes | Yes | No | Yes | No | Yes | NA  | NA  | Yes | NA  | Yes | NA | NA | Yes | FAIR           |
| Manca 2020 <sup>56</sup>              | Yes | Yes | No | Yes | No | No  | NA  | NA  | Yes | NA  | No  | NA | NA | Yes | POOR           |
| Marchezini 2018 <sup>57</sup>         | Yes | Yes | No | Yes | NA | NA  | NA  | NA  | NA  | NA  | NA  | NA | NA | NA  | FAIR           |
| Melo 2019 <sup>58</sup>               | Yes | Yes | No | Yes | No | Yes | Yes | Yes | Yes | Yes | Yes | NA | No | Yes | FAIR           |

| Author and year of publication          | 1   | 2   | 3  | 4   | 5   | 6   | 7  | 8  | 9   | 10 | 11  | 12 | 13 | 14  | Quality rating |
|-----------------------------------------|-----|-----|----|-----|-----|-----|----|----|-----|----|-----|----|----|-----|----------------|
| Mendizábal-Burastero 2015 <sup>59</sup> | Yes | Yes | No | Yes | No  | NA  | NA | NA | Yes | NA | Yes | NA | NA | NA  | FAIR           |
| Mendoza 2013 <sup>60</sup>              | Yes | Yes | No | CD  | Yes | NA  | NA | NA | Yes | NA | Yes | NA | NA | No  | POOR           |
| Miranda 2017 <sup>61</sup>              | Yes | Yes | No | Yes | Yes | No  | NA | NA | Yes | NA | Yes | NA | NA | Yes | FAIR           |
| Montano 2020 <sup>62</sup>              | Yes | Yes | No | Yes | No  | Yes | NA | NA | Yes | No | Yes | NA | NA | Yes | FAIR           |
| Morales-Miranda 2013 <sup>63</sup>      | Yes | No  | No | Yes | No  | No  | NA | NA | Yes | NA | Yes | NA | NA | No  | POOR           |
| Morales-Miranda 2013 <sup>64</sup>      | Yes | No  | No | Yes | No  | No  | NA | NA | Yes | NA | Yes | NA | NA | No  | POOR           |
| Moriarty 2019 <sup>65</sup>             | Yes | Yes | No | Yes | No  | No  | NA | NA | Yes | NA | Yes | NA | NA | Yes | FAIR           |
| Mucci 2016 <sup>66</sup>                | Yes | Yes | No | Yes | No  | No  | NA | NA | Yes | NA | Yes | NA | NA | No  | POOR           |
| Núñez-Forero 2012 <sup>67</sup>         | Yes | Yes | No | Yes | Yes | NA  | NA | NA | NA  | NA | Yes | NA | NA | NA  | FAIR           |
| Occhionero 2018 <sup>68</sup>           | Yes | Yes | No | CD  | No  | No  | NA | NA | Yes | NA | Yes | NA | NA | No  | POOR           |
| Ovalle 2012 <sup>69</sup>               | Yes | Yes | No | Yes | NA  | NA  | NA | NA | NA  | NA | Yes | NA | NA | NA  | FAIR           |

| Author and year of publication  | 1   | 2   | 3   | 4   | 5   | 6  | 7  | 8  | 9   | 10 | 11  | 12 | 13 | 14  | Quality rating |
|---------------------------------|-----|-----|-----|-----|-----|----|----|----|-----|----|-----|----|----|-----|----------------|
| Pantoja 2012 <sup>70</sup>      | Yes | Yes | No  | Yes | Yes | NA | NA | NA | NA  | NA | Yes | NA | NA | NA  | FAIR           |
| Paredes 2015 <sup>71</sup>      | Yes | Yes | Yes | CD  | Yes | No | NA | NA | Yes | NA | Yes | NA | NA | No  | FAIR           |
| Passaro 2018 <sup>72</sup>      | Yes | Yes | No  | Yes | No  | No | NA | NA | Yes | NA | Yes | NA | NA | Yes | FAIR           |
| Patterson 2019 <sup>73</sup>    | Yes | Yes | No  | Yes | No  | No | NA | NA | Yes | NA | Yes | NA | NA | Yes | FAIR           |
| Paz-Bailey 2012 <sup>24</sup>   | Yes | Yes | No  | Yes | Yes | No | NA | NA | Yes | NA | Yes | NA | NA | Yes | FAIR           |
| Peña-Toribio 2019 <sup>74</sup> | Yes | No  | No  | Yes | No  | No | NA | NA | Yes | NA | Yes | NA | NA | Yes | POOR           |
| Pérez-Brumer 2013 <sup>75</sup> | Yes | Yes | No  | Yes | No  | No | NA | NA | Yes | NA | Yes | NA | NA | No  | POOR           |
| Piazzetta 2011 <sup>76</sup>    | Yes | Yes | No  | CD  | Yes | No | NA | NA | Yes | NA | Yes | NA | NA | No  | POOR           |
| Pinto 2011 <sup>6</sup>         | Yes | Yes | Yes | Yes | Yes | No | NA | NA | Yes | NA | Yes | NA | NA | Yes | GOOD           |
| Pinto 2016 <sup>77</sup>        | Yes | Yes | No  | Yes | Yes | No | NA | NA | Yes | NA | Yes | NA | NA | Yes | FAIR           |
| Piscopo 2018 <sup>78</sup>      | Yes | Yes | No  | Yes | No  | No | NA | NA | Yes | NA | Yes | NA | NA | No  | POOR           |
| Pollet 2013 <sup>79</sup>       | Yes | Yes | No  | Yes | No  | No | NA | NA | Yes | NA | Yes | NA | NA | Yes | FAIR           |
| Rahman 2015 <sup>80</sup>       | Yes | Yes | No  | Yes | No  | No | NA | NA | Yes | No | Yes | NA | NA | No  | POOR           |

| Author and year of publication         | 1   | 2   | 3  | 4   | 5   | 6   | 7   | 8  | 9   | 10 | 11  | 12 | 13 | 14  | Quality rating |
|----------------------------------------|-----|-----|----|-----|-----|-----|-----|----|-----|----|-----|----|----|-----|----------------|
| Reyes 2020 <sup>81</sup>               | Yes | Yes | No | Yes | No  | NA  | NA  | NA | Yes | NA | Yes | NA | NA | No  | POOR           |
| Ribas 2011 <sup>82</sup>               | Yes | Yes | No | Yes | NA  | NA  | NA  | NA | NA  | NA | NR  | NA | NA | NA  | FAIR           |
| Rocha 2014 <sup>83</sup>               | Yes | Yes | No | Yes | No  | No  | NA  | NA | Yes | NA | Yes | NA | NA | Yes | FAIR           |
| Rodrigues 2011 <sup>84</sup>           | Yes | Yes | No | Yes | No  | No  | NA  | NA | Yes | NA | Yes | NA | NA | No  | POOR           |
| Rodrigues 2019 <sup>85</sup>           | Yes | Yes | No | Yes | No  | No  | NA  | NA | Yes | NA | Yes | NA | NA | Yes | FAIR           |
| Rodríguez 2020 <sup>86</sup>           | Yes | Yes | No | Yes | NA  | Yes | Yes | NA | NA  | NA | NA  | NA | NA | NA  | FAIR           |
| Rojas 2012 <sup>87</sup>               | Yes | Yes | No | Yes | NA  | NA  | NA  | NA | NA  | NA | NA  | NA | NA | NA  | FAIR           |
| Sabidó 2011 <sup>88</sup>              | Yes | Yes | No | Yes | No  | No  | NA  | NA | Yes | NA | Yes | NA | NA | Yes | FAIR           |
| Sánchez Palencia<br>2017 <sup>89</sup> | Yes | Yes | No | Yes | NA  | NA  | NA  | NA | NA  | NA | Yes | NA | NA | NA  | FAIR           |
| Scheidell 2016 <sup>90</sup>           | Yes | No  | No | NR  | No  | No  | NA  | NA | Yes | NA | Yes | NA | NA | No  | POOR           |
| Scheidell 2018 <sup>91</sup>           | Yes | Yes | No | Yes | Yes | No  | NA  | NA | Yes | NA | Yes | NA | NA | Yes | FAIR           |
| Silveira 2020 <sup>92</sup>            | Yes | Yes | No | Yes | NA  | No  | NA  | NA | Yes | NA | Yes | NA | NA | Yes | FAIR           |

| Author and year of publication         | 1   | 2   | 3   | 4   | 5   | 6  | 7  | 8  | 9   | 10 | 11  | 12 | 13 | 14  | Quality rating |
|----------------------------------------|-----|-----|-----|-----|-----|----|----|----|-----|----|-----|----|----|-----|----------------|
| Snead 2017 <sup>93</sup>               | Yes | CD  | No  | CD  | No  | No | NA | NA | Yes | NA | Yes | NA | NA | Yes | POOR           |
| Souza 2013 <sup>94</sup>               | Yes | Yes | No  | Yes | No  | No | NA | NA | Yes | NA | Yes | NA | NA | No  | POOR           |
| Strathdee 2011 <sup>95</sup>           | Yes | Yes | No  | Yes | No  | No | NA | NA | Yes | NA | No  | NA | NA | Yes | FAIR           |
| Tinajeiros 2012 <sup>96</sup>          | Yes | Yes | No  | Yes | No  | No | NA | NA | Yes | NA | Yes | NA | NA | No  | POOR           |
| Travassos 2016 <sup>97</sup>           | Yes | Yes | No  | Yes | No  | No | NA | NA | Yes | NA | Yes | NA | NA | Yes | FAIR           |
| Veloso 2020 <sup>98</sup>              | Yes | No  | No  | Yes | NR  | No | NA | NA | Yes | NA | Yes | NA | NA | Yes | POOR           |
| Villarán 2013 <sup>99</sup>            | Yes | Yes | No  | NR  | No  | No | NA | NA | Yes | NA | Yes | NA | NA | NR  | POOR           |
| Villegas 2018 <sup>100</sup>           | Yes | No  | CD  | CD  | Yes | No | NA | NA | Yes | NA | Yes | NA | NA | No  | POOR           |
| Villegas Cataño<br>2016 <sup>101</sup> | Yes | Yes | Yes | Yes | Yes | No | NA | NA | Yes | NA | Yes | NA | NA | Yes | GOOD           |
| Weir 2015 <sup>1</sup>                 | Yes | No  | No  | NR  | No  | NA | NA | NA | Yes | NA | Yes | NA | NA | NA  | POOR           |
| Wohlmeister 2016 <sup>102</sup>        | Yes | Yes | No  | Yes | No  | NA | NA | NA | NA  | NA | Yes | NA | NA | NA  | FAIR           |
| Yeganeh 2021 <sup>103</sup>            | Yes | Yes | No  | Yes | No  | No | NA | NA | Yes | NA | Yes | NA | NA | Yes | FAIR           |

| Author and year of publication | 1   | 2   | 3  | 4   | 5  | 6  | 7  | 8  | 9  | 10 | 11  | 12 | 13 | 14 | Quality rating |
|--------------------------------|-----|-----|----|-----|----|----|----|----|----|----|-----|----|----|----|----------------|
| Zotta 2014 <sup>104</sup>      | Yes | Yes | No | Yes | NA | NA | NA | NA | NA | NA | Yes | NA | NA | NA | FAIR           |

CD, cannot be determined; NA, not applicable; NR, not reported

1. Was the question or research objective clearly stated in this study?
2. Was the study population clearly specified and defined?
3. Was the participation of eligible people at least 50%?
4. Were all subjects selected or recruited from the same population or from similar populations (including the same time period)? Were the inclusion and exclusion criteria for participation in the study uniformly pre-specified and applied to all participants?
5. Were a sample size justification, power description, or variance and effect estimates provided?
6. For the analysis in this study, were the exposure(s) of interest measured before the outcome(s) were measured?
7. Was the follow-up period sufficient for one to reasonably expect to see an association between exposure and outcome if it existed?
8. For exposures that may vary in quantity or level, did the study examine different levels of exposure in relation to the outcome (e.g., exposure categories or exposure measured as a continuous variable)?
9. Were exposure measures (independent variables) clearly defined, valid, reliable, and consistently implemented across all study participants?
10. Were exposures evaluated more than once over time?
11. Were outcome measures (dependent variables) clearly defined, valid, reliable, and consistently implemented across all study participants?
12. Were outcome evaluators blinded to participants' exposure status?
13. Was the loss of follow-up after study initiation 20% or less?

14. Were potential key confounding variables measured and adjusted statistically for their impact on the relationship between exposure(s) and outcome(s)?

**Supplementary Material Table S5 Risk of bias assessment for case series**

| Author and date of publication | 1   | 2  | 3   | 4  | 5  | 6  | 7  | 8  | 9   | Quality rating |
|--------------------------------|-----|----|-----|----|----|----|----|----|-----|----------------|
| Bastos 2019 <sup>105</sup>     | Yes | No | Yes | CD | NA | CD | NA | No | Yes | FAIR           |

NA: not applicable, NR: not reported, CD: cannot be determined

1. Was the question or objective of the study clearly stated?
2. Was the study population clearly and completely described, including a case definition?
3. Were the cases consecutive?
4. Were the subjects comparable?
5. Was the exposure clearly described?
6. Were outcome measures clearly defined, valid, reliable, and consistently implemented across all study participants?
7. Was the duration of follow-up adequate?
8. Were the statistical methods well described?
9. Were the results well described?



**Supplementary Material Table S6 Number of cases of gonococcal genital discharge, Argentina, 2011–2018**

| <b>Year</b> | <b>Cases in women, N (%)</b> | <b>Cases in men, N (%)</b> | <b>Total number of cases</b> | <b>Rate per 100 000 inhabitants</b> |
|-------------|------------------------------|----------------------------|------------------------------|-------------------------------------|
| 2011        | -                            | -                          | 2680                         | 6.68                                |
| 2012        | -                            | -                          | 2670                         | 6.66                                |
| 2013        | -                            | -                          | 3551                         | 8.85                                |
| 2014        | -                            | -                          | 3246                         | 8.09                                |
| 2015        | 395 (46)                     | 466 (54)                   | 861                          | -                                   |
| 2016        | 228 (40)                     | 348 (60)                   | 576                          | -                                   |
| 2017        | 231 (38)                     | 383 (62)                   | 614                          | -                                   |
| 2018        | 3618 (22)                    | 12 532 (78)                | 16 150                       | -                                   |

**Supplementary Material Table S7 Total and average days of hospitalisation due to gonococcal infection in Chile, by gender, 2012–2018<sup>106</sup>**

| Year | Total population |         | Women      |         | Men        |         |
|------|------------------|---------|------------|---------|------------|---------|
|      | Total days       | Average | Total days | Average | Total days | Average |
| 2012 | 290              | 7.6     | 210        | 7.8     | 80         | 7.3     |
| 2013 | 183              | 4.2     | 94         | 4.1     | 89         | 4.2     |
| 2014 | 271              | 7.1     | 60         | 3.2     | 211        | 11.1    |
| 2015 | 225              | 6.8     | 126        | 7.3     | 99         | 7.6     |
| 2016 | 223              | 6.6     | 162        | 7.7     | 61         | 4.7     |
| 2017 | 268              | 5.5     | 154        | 7       | 114        | 4.2     |
| 2018 | 306              | 7.01    | 229        | 8.8     | 77         | 4.5     |

**Supplementary Material Table S8 Number of new cases of gonococcal infection diagnosed in Chile,  
2000—2017<sup>106</sup>**

| <b>Year</b> | <b>Total new cases</b> | <b>Cases per 100 000 inhabitants</b> |
|-------------|------------------------|--------------------------------------|
| 2000        | 2488                   | 16.2                                 |
| 2001        | 2385                   | 13.8                                 |
| 2002        | 2014                   | 12.8                                 |
| 2003        | 1918                   | 12.1                                 |
| 2004        | 1718                   | 10.7                                 |
| 2005        | 1720                   | 10.7                                 |
| 2006        | 1293                   | 8                                    |
| 2007        | 1251                   | 7.6                                  |
| 2008        | 1028                   | 6.2                                  |
| 2009        | 1065                   | 6.3                                  |
| 2010        | 1290                   | 7.6                                  |
| 2011        | 1428                   | 8.3                                  |
| 2012        | 1470                   | 8.4                                  |
| 2013        | 1533                   | 8.7                                  |
| 2014        | 1473                   | 8.3                                  |
| 2015        | 1797                   | 10                                   |
| 2016        | 2042                   | 11.2                                 |
| 2017        | 2768                   | 15.1                                 |

**Supplementary Material Table S9 Number of deaths due to gonococcal infection in Colombia, 2011—  
2020<sup>107</sup>**

| ICD-10 | 2017              |                   | 2018              | 2019              |                 | 2020              | Total |
|--------|-------------------|-------------------|-------------------|-------------------|-----------------|-------------------|-------|
|        | Male, 15–19 years | Male, 65–69 years | Male, 70–74 years | Male, 75–79 years | Male, ≥80 years | Male, 55–59 years |       |
| A540   | 0                 | 0                 | 0                 | 1                 | 0               | 0                 | 1     |
| A542   | 0                 | 0                 | 0                 | 0                 | 1               | 0                 | 1     |
| A548   | 1                 | 1                 | 1                 | 0                 | 0               | 0                 | 3     |
| A549   | 0                 | 0                 | 0                 | 0                 | 0               | 1                 | 1     |
| Total  | 1                 | 1                 | 1                 | 1                 | 1               | 1                 | 6     |

ICD-10, International Classification of Diseases Tenth Revision; A540, Gonococcal lower genitourinary tract infection without periurethral or accessory gland abscess; A542, Gonococcal pelvi-peritonitis and other genitourinary gonococcal infections; A548, Other gonococcal infections; A549, Gonococcal infection, unspecified

**Supplementary Material Table S10 Number of reported cases of gonococcal infection of the genitourinary tract (ICD-10 A54.0-A54.2) in Mexico, 2011–2021<sup>108</sup>**

| <b>Year</b>  | <b>Men, N (%)</b>  | <b>Women, N (%)</b> | <b>Total</b>  |
|--------------|--------------------|---------------------|---------------|
| 2011         | 509 (36)           | 890 (64)            | 1399          |
| 2012         | 550 (39)           | 854 (61)            | 1404          |
| 2013         | 500 (38)           | 828 (62)            | 1328          |
| 2014         | 796 (37)           | 1354 (63)           | 2150          |
| 2015         | 845 (40)           | 1285 (60)           | 2130          |
| 2016         | 878 (44)           | 1133 (56)           | 2011          |
| 2017         | 2588 (54)          | 2176 (46)           | 4764          |
| 2018         | 2417 (57)          | 1859 (43)           | 4276          |
| 2019         | 2767 (62)          | 1728 (38)           | 4495          |
| 2020         | 2505 (36)          | 4496 (64)           | 7001          |
| 2021         | 1739 (28)          | 4403 (72)           | 6142          |
| <b>Total</b> | <b>16 094 (43)</b> | <b>21 006 (57)</b>  | <b>37 100</b> |

ICD-10, International Classification of Diseases Tenth Revision

**Supplementary Material Table S11 Number of hospital discharges due to gonococcal infection.**

**Uruguay, 2015—2019**

| <b>Year</b>  | <b>Number of discharges</b> |
|--------------|-----------------------------|
| 2015         | 5                           |
| 2016         | 9                           |
| 2017         | 11                          |
| 2018         | 19                          |
| 2019         | 9                           |
| <b>Total</b> | <b>53</b>                   |

## Supplementary Figures

### Supplementary Material Figure S1 Gonorrhoea risk. Population with non-high risk for gonorrhoea

Fixed effects (inverse variance)

Pooled proportion = 0.008478 (95% CI = 0.007639 to 0.009359)

Non-combinability of studies

Cochran Q = 774.356402 (df = 47) P < 0.0001

Moment-based estimate of between studies variance = 0.018318

I<sub>2</sub> (inconsistency) = 93.9% (95% CI = 93% to 94,7%)

Random effects (DerSimonian-Laird)

Pooled proportion = 0.014604 (95% CI = 0.010034 to 0.020014)

Bias indicators

Begg-Mazumdar: Kendall's 0.301418 P = 0.0023

Egger: bias = 2.335282 (95% CI = 1,530674 to 3.13989) P < 0.0001

Harbord: bias = 3.704995 (92.5% CI = 0.736516 to 6.673475) P = 0.0277

Proportion meta-analysis plot [fixed effects]

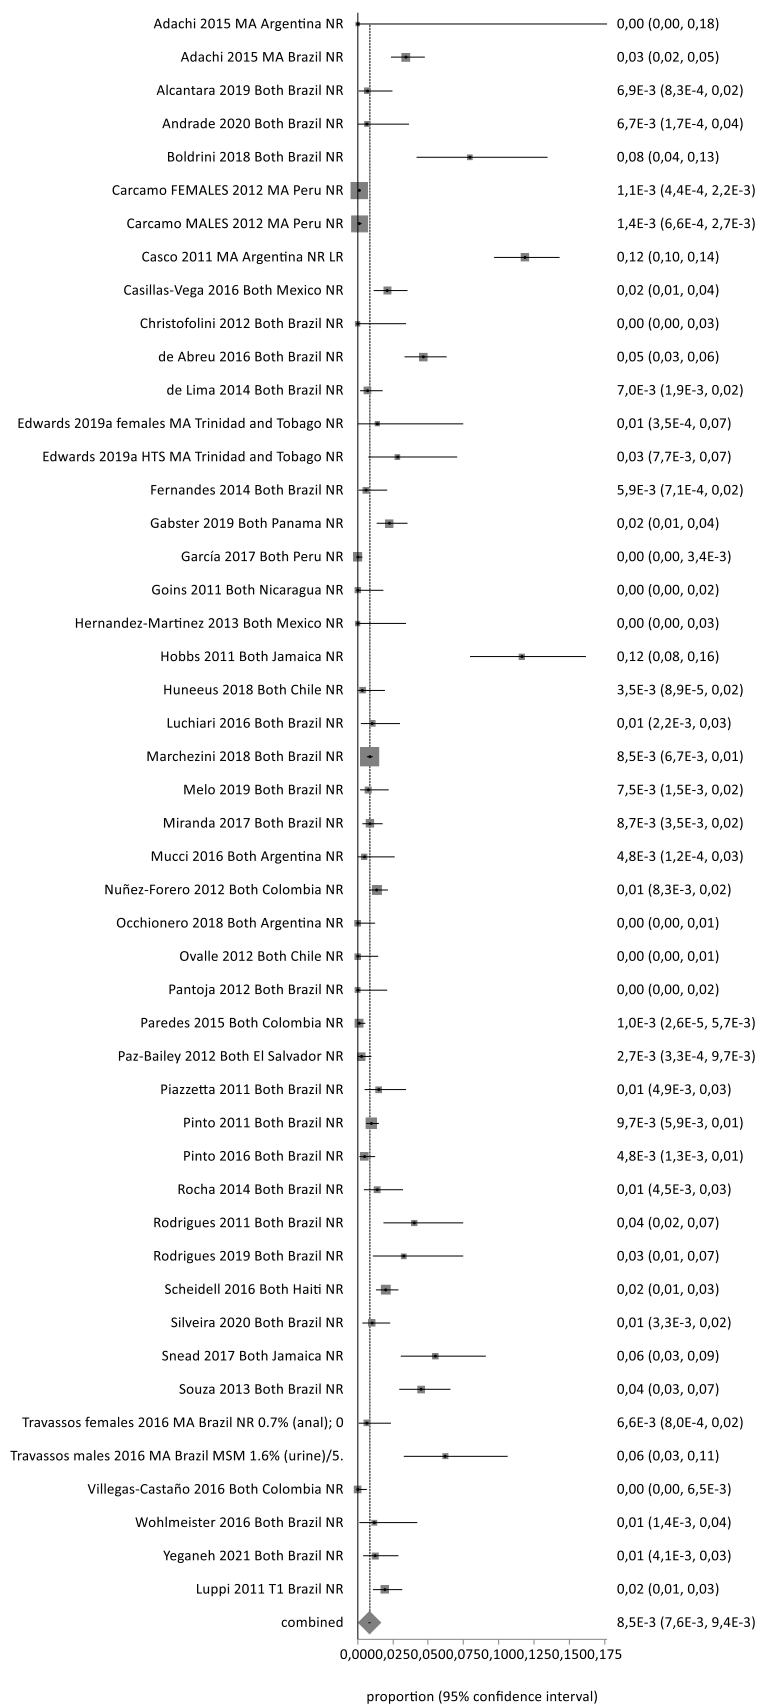



**Supplementary Material Figure S2 Gonorrhoea risk. Population at high-risk of gonorrhoea**

Fixed effects (inverse variance)

Pooled proportion = 0.048744 (95% CI = 0.046949 to 0.05057)

Non-combinability of studies

Cochran Q = 2.924,646457 (df = 57) P < 0.0001

Moment-based estimate of between studies variance = 0.063572

I<sub>2</sub> (inconsistency) = 98.1% (95% CI = 97.9% to 98.2%)

Random effects (DerSimonian-Laird)

Pooled proportion = 0.056772 (95% CI = 0.042309 to 0.073214)

Bias indicators

Begg-Mazumdar: Kendall's 0.372051 P < 0.0001

Egger: bias = 4.413633 (95% CI = 2.437426 to 6.38984) P < 0.0001

Harbord: bias = 2.865768 (92.5% CI = -0.595493 to 6.327029) P = 0.1387

Proportion meta-analysis plot [random effects]

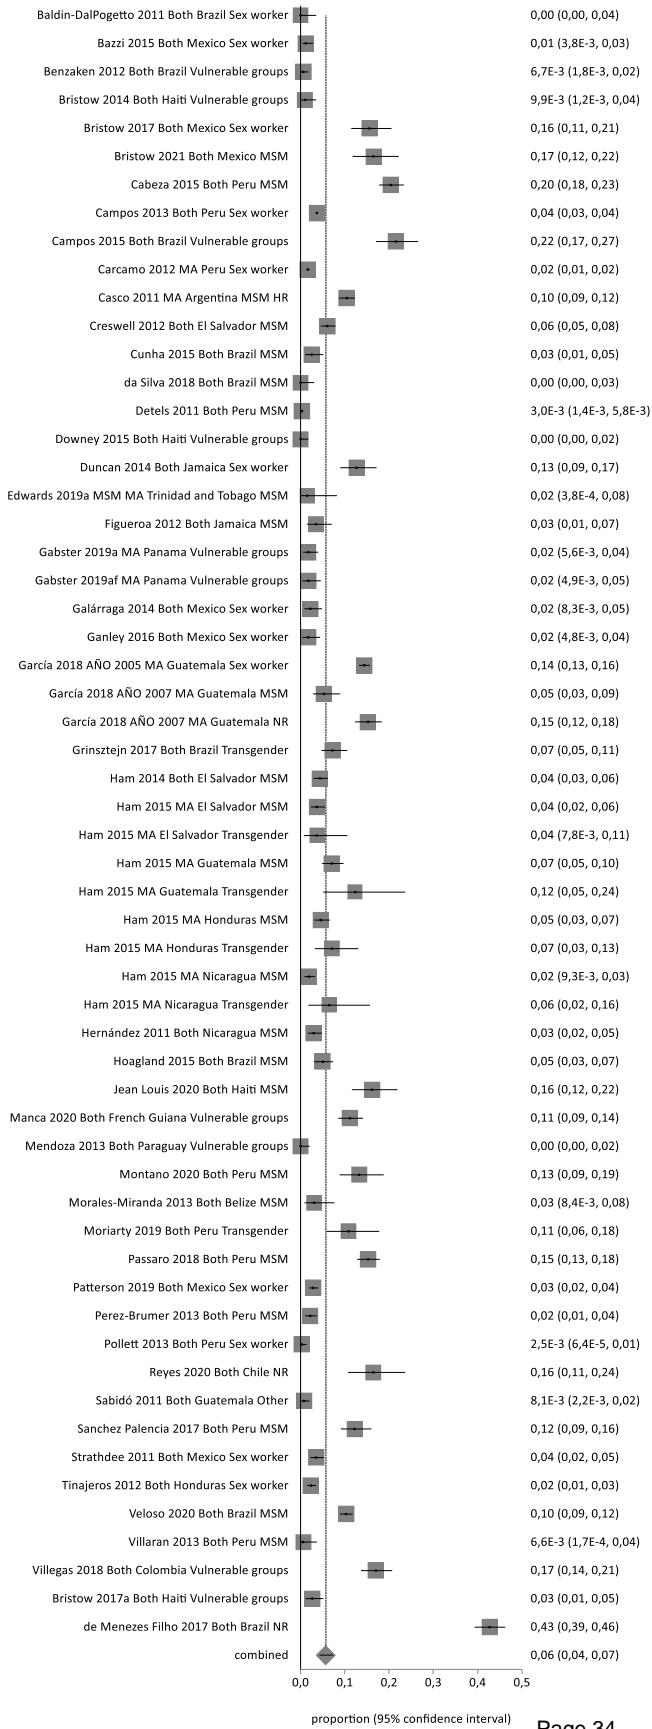

**Supplementary Material Figure S3 Gonorrhoea risk. Population with unreported risk for gonorrhoea**

Fixed effects (inverse variance)

Pooled proportion = 0.078676 (95% CI = 0.070495 to 0.087265)

Non-combinability of studies

Cochran Q = 171.552151 (df = 6) P < 0.0001

Moment-based estimate of between studies variance = 0.054625

I<sub>2</sub> (inconsistency) = 96.5% (95% CI = 95.1% to 97.3%)

Random effects (DerSimonian-Laird)

Pooled proportion = 0.05974 (95% CI = 0.024749 to 0.108627)

Bias indicators

Begg-Mazumdar: Kendall's 0.333333 P = 0.3813

Egger: bias = 6.287107 (95% CI = -8.081175 to 20.655388) P = 0.3117

Harbord: bias = -4.453726 (92.5% CI = -17.362304 to 8.454852) P = 0.4741

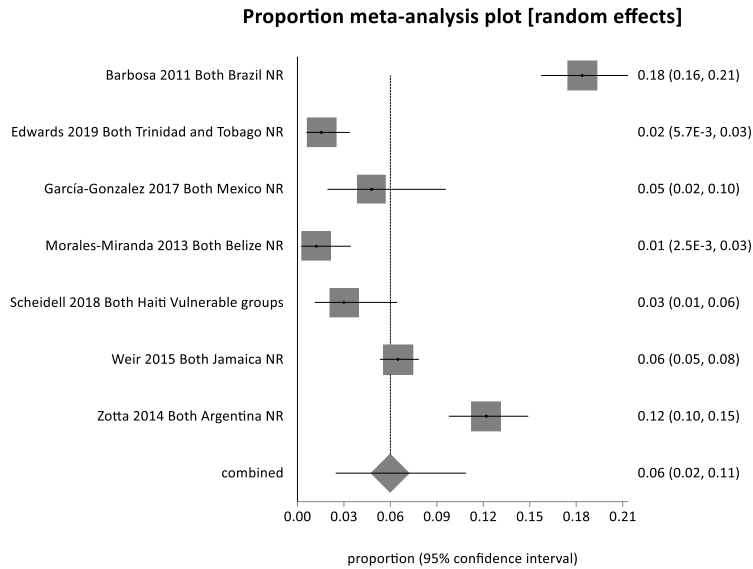

**Supplementary Material Figure S4 Type of study sampling and risk for gonorrhoea. Random sampling and population with non-high risk**

Fixed effects (inverse variance)

Pooled proportion = 0.002422 (95% CI = 0.001741 to 0.003214)

Non-combinability of studies

Cochran Q = 65.871673 (df = 5)  $P < 0.0001$

Moment-based estimate of between studies variance = 0.005061

$I^2$  (inconsistency) = 92.4% (95% CI = 86.7% to 95%)

Random effects (DerSimonian-Laird)

Pooled proportion = 0.004021 (95% CI = 0.001086 to 0.008799)

Bias indicators

Begg-Mazumdar: Kendall's 0.6  $P = 0.1361$

Egger: bias = 2.526567 (95% CI = -1.052122 to 6.105256)  $P = 0.1215$

Harbord: bias = 6.769478 (92.5% CI = -5.988104 to 19.52706)  $P = 0.2732$

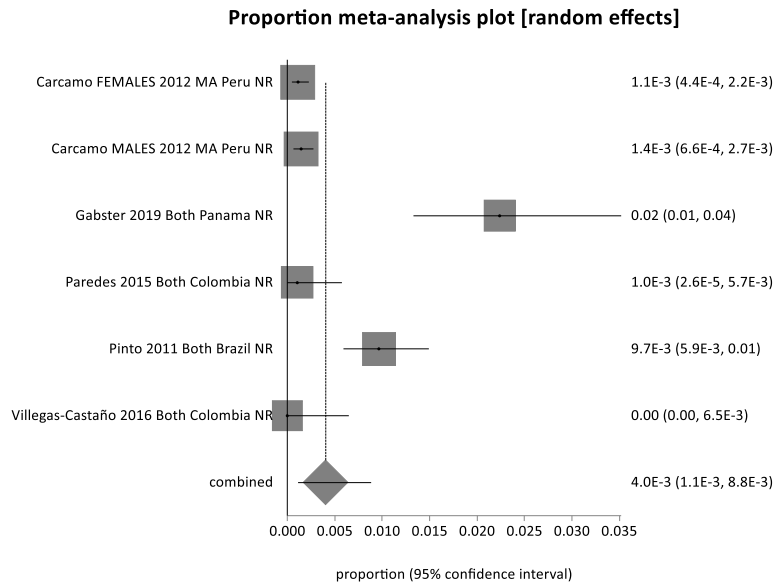

**Supplementary Material Figure S5. Type of study sampling and risk for gonorrhoea. Random sampling and population with high risk**

Fixed effects (inverse variance)

Pooled proportion = 0.01661 (95% CI = 0.013181 to 0.020427)

Non-combinability of studies

Cochran Q = 0.244741 (df = 2) P = 0.8848

Moment-based estimate of between studies variance = 0

I<sup>2</sup> (inconsistency) = 0% (95% CI = 0% to 72.9%)

Random effects (DerSimonian-Laird)

Pooled proportion = 0.01661 (95% CI = 0.013181 to 0.020427)

Bias indicators

Begg-Mazumdar: Kendall's <too few strata> P = \*

Egger: bias = \* (95% CI = \* to \*) P = \*

Harbord: bias = 0.218928 (92.5% CI = -0.11104 to 0.548897) P = 0.1124

**Proportion meta-analysis plot [random effects]**

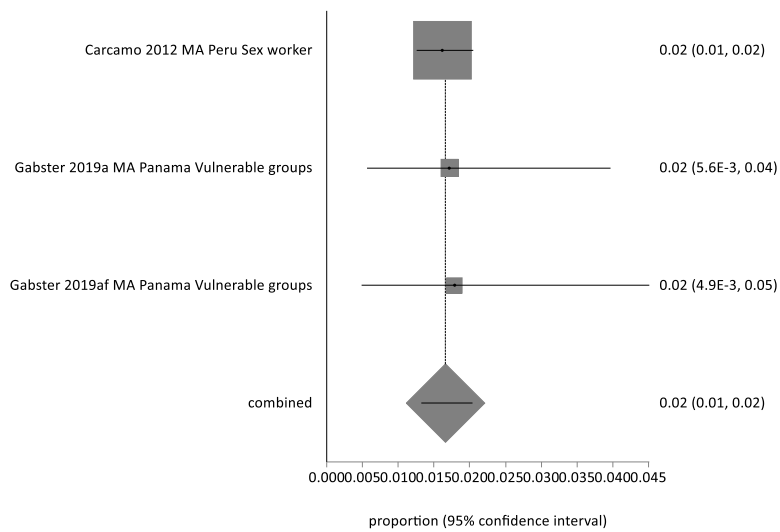

**Supplementary Material Figure S6 Type of study sampling and risk for gonorrhoea. Convenience sampling in a population with non-high risk that seeks medical help within the health system**

Fixed effects (inverse variance)

Pooled proportion = 0.015412 (95% CI = 0.013925 to 0.016974)

Non-combinability of studies

Cochran Q = 447.054281 (df = 37) P < 0.0001

Moment-based estimate of between studies variance = 0,018888

I<sub>2</sub> (inconsistency) = 91.7% (95% CI = 90% to 93%)

Random effects (DerSimonian-Laird)

Pooled proportion = 0.018217 (95% CI = 0.012394 to 0.025134)

Bias indicators

Begg-Mazumdar: Kendall's 0.445235 P < 0.0001

Egger: bias = 1.954313 (95% CI = 0.768232 to 3.140394) P = 0.002

Harbord: bias = 1.937949 (92.5% CI = -0.930142 to 4.806039) P = 0.2234

Proportion meta-analysis plot [random effects]

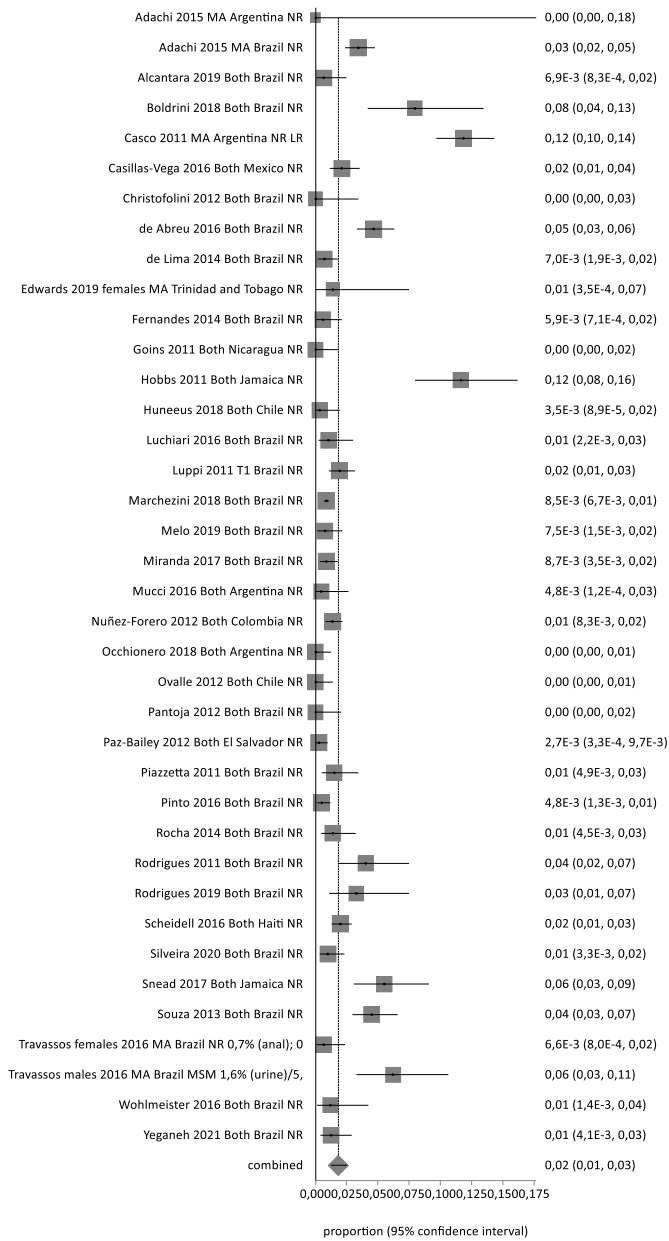

**Supplementary Material Figure S7 Type of study sampling and risk for gonorrhoea. Convenience sampling in a population with high/unreported risk that seeks medical help within the health system**

Fixed effects (inverse variance)

Pooled proportion = 0.093153 (95% CI = 0.088981 to 0.097411)

Non-combinability of studies

Cochran Q = 1.649,072953 (df = 35) P < 0.0001

Moment-based estimate of between studies variance = 0.094407

I<sub>2</sub> (inconsistency) = 97.9% (95% CI = 97.7% to 98.1%)

Random effects (DerSimonian-Laird)

Pooled proportion = 0.06162 (95% CI = 0.039353 to 0.088473)

Bias indicators

Begg-Mazumdar: Kendall's 0.438095 P = 0.0001

Egger: bias = 8.031752 (95% CI = 4.153658 to 11.909846) P = 0.0002

Harbord: bias = -5.833542 (92.5% CI = -10.715138 to -0.951946) P = 0.0351



Proportion meta-analysis plot [random effects]

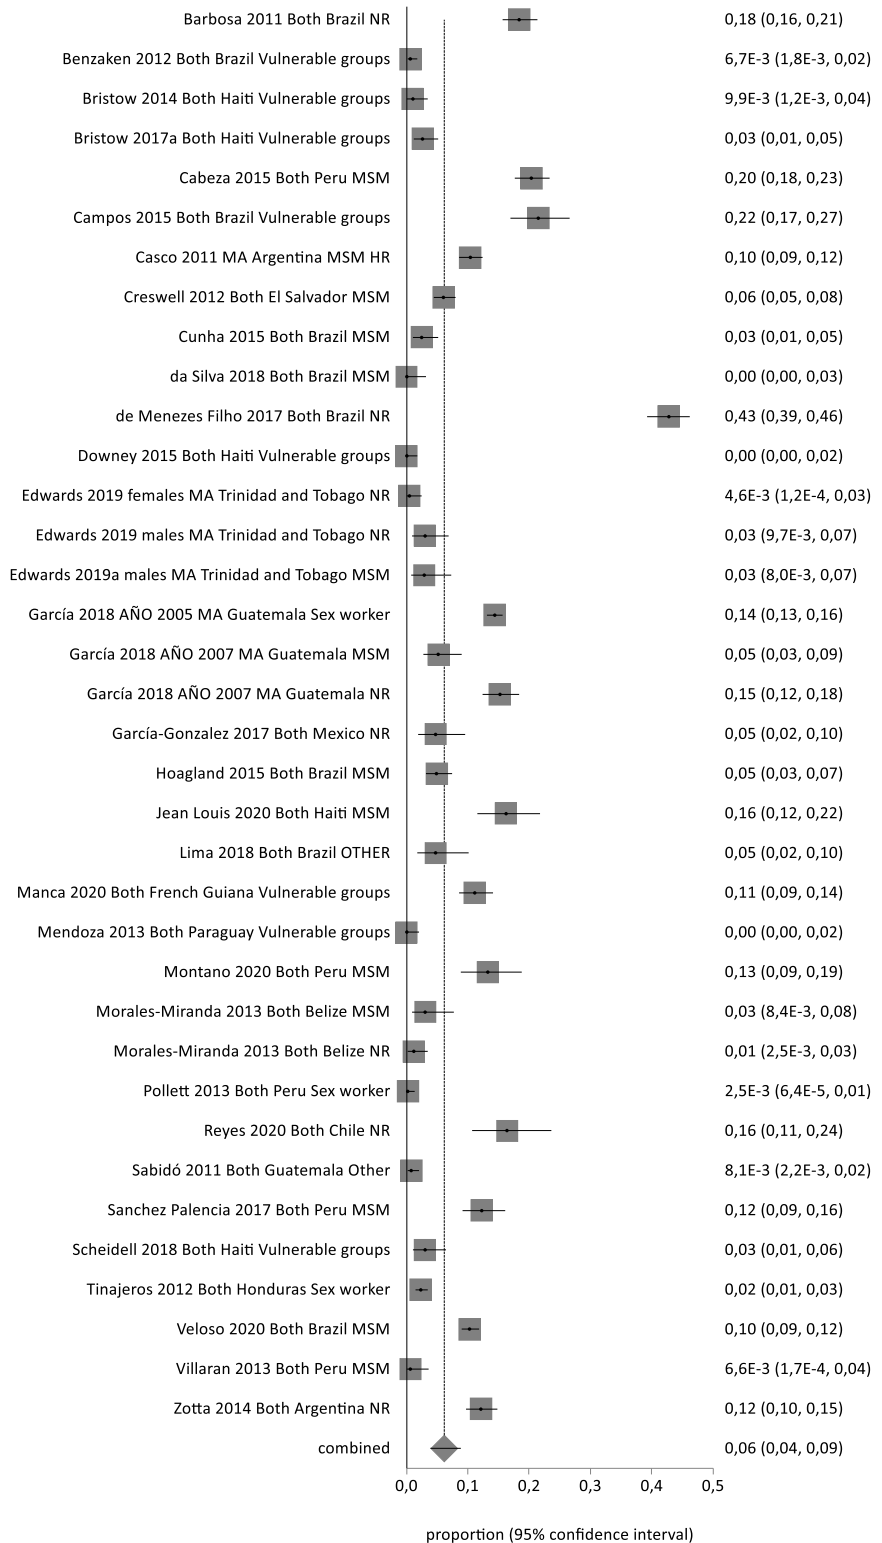

**Supplementary Material Figure S8 Type of study sampling and risk for gonorrhoea. Convenience sampling in a population with non-high risk for gonorrhoea (with or without concomitant convenience sampling in a population that seeks medical help within the health system)**

Fixed effects (inverse variance)

Pooled proportion = 0.000738 (95% CI = 1.578410E-007 to 0.002908)

Non-combinability of studies

Cochran Q = 3.871562 (df = 2) P = 0.1443

Moment-based estimate of between studies variance = 0.004274

I<sub>2</sub> (inconsistency) = 48.3% (95% CI = 0% to 84.2%)

Random effects (DerSimonian-Laird)

Pooled proportion = 0.00188 (95% CI = 0.000072 to 0.009047)

Bias indicators

Begg-Mazumdar: Kendall's <too few strata> P = \* Egger: bias = \* (95% CI = \* to \*) P = \*

Harbord: bias = 2.099037 (92.5% CI = -20.193923 to 24.391996) P = 0.5722

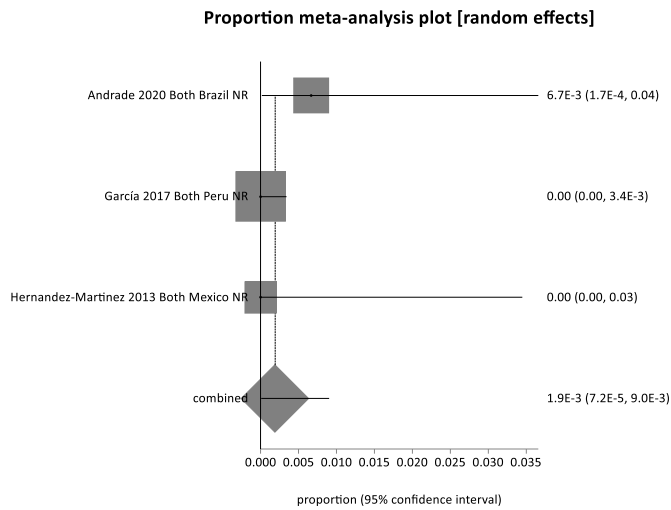

**Supplementary Material Figure S9 Type of study sampling and risk for gonorrhoea. Convenience sampling in a population with high/unreported risk for gonorrhoea (with or without concomitant convenience sampling in a population that seeks medical help within the health system)**

Fixed effects (inverse variance)

Pooled proportion = 0.036332 (95% CI = 0.034386 to 0.038328)

Non-combinability of studies

Cochran Q = 531.673992 (df = 25) P < 0.0001

Moment-based estimate of between studies variance = 0.023964

I<sub>2</sub> (inconsistency) = 95.3% (95% CI = 94.4% to 96%)

Random effects (DerSimonian-Laird)

Pooled proportion = 0.044643 (95% CI = 0.032357 to 0.058796)

Bias indicators

Begg-Mazumdar: Kendall's 0.169231 P = 0.2365

Egger: bias = 2.86229 (95% CI = 0.419578 to 5.305003) P = 0.0235

Harbord: bias = 1.732223 (92.5% CI = -0.870364 to 4.33481) P = 0.2274

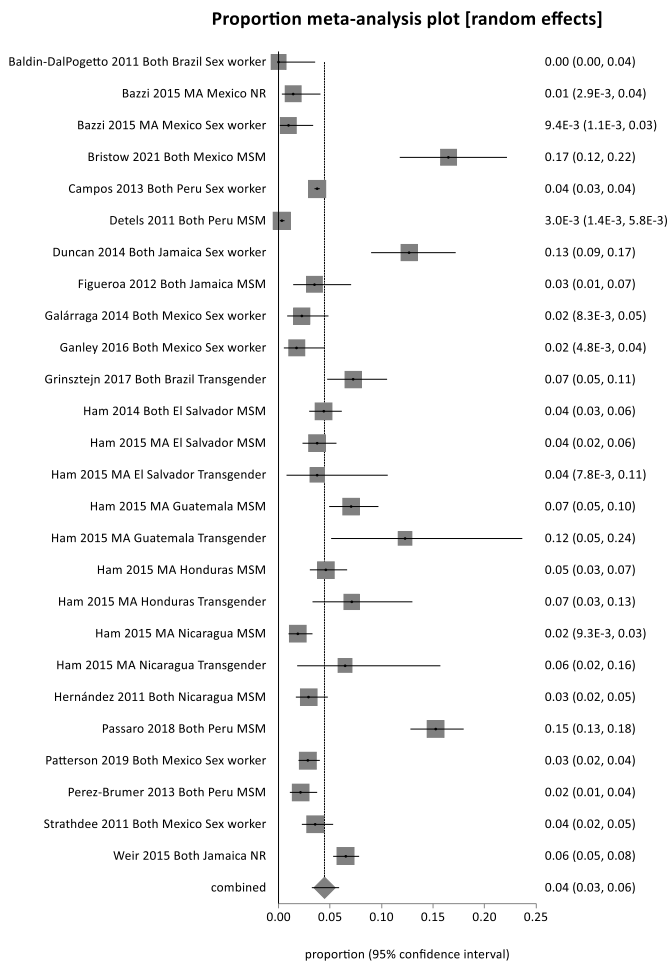

**Supplementary Material Figure S10. Symptoms. Population with symptoms compatible with gonorrhoea and non-high risk**

Fixed effects (inverse variance)

Pooled proportion = 0.047551 (95% CI = 0.039476 to 0.056337)

Non-combinability of studies

Cochran Q = 130.217913 (df = 2) P < 0.0001

Moment-based estimate of between studies variance = 0.0935

I<sub>2</sub> (inconsistency) = 98.5% (95% CI = 97.7% to 98.9%)

Random effects (DerSimonian-Laird)

Pooled proportion = 0.072575 (95% CI = 0.009571 to 0.187277)

Bias indicators

Begg-Mazumdar: Kendall's <too few strata> P = \*

Egger: bias = \* (95% CI = \* to \*) P = \*

Harbord: bias = 15.736545 (92,5% CI = -123.734366 to 155.207455) P = 0.5152

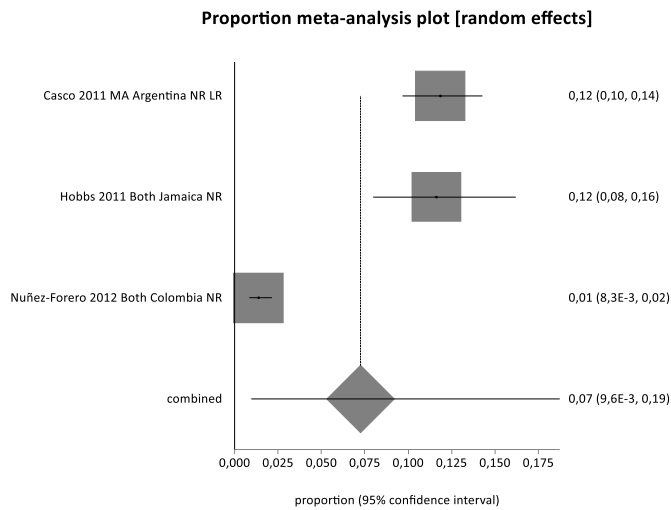

**Supplementary Material Figure S11. Symptoms. Population with symptoms compatible with gonorrhoea and high/unreported risk**

Fixed effects (inverse variance)

Pooled proportion = 0.182348 (95% CI = 0.168711 to 0.196393)

Non-combinability of studies

Cochran Q = 406.4268 (df = 4) P < 0.0001

Moment-based estimate of between studies variance = 0.185187

I<sup>2</sup> (inconsistency) = 99% (95% CI = 98.8% to 99.2%)

Random effects (DerSimonian-Laird)

Pooled proportion = 0.128247 (95% CI = 0.030701 to 0.278899)

Bias indicators

Begg-Mazumdar: Kendall's 0.4 P = 0.4833

Egger: bias = 20.703743 (95% CI = -24.019507 to 65.426992) P = 0.2371

Harbord: bias = -8.842993 (92.5% CI = -48.528091 to 30.842104) P = 0.5924

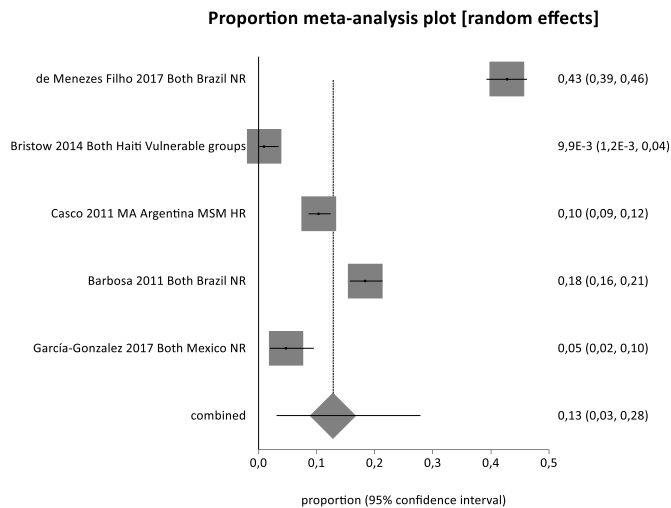

**Supplementary Material Figure S12. Symptoms. Asymptomatic population with non-high risk**

Fixed effects (inverse variance)

Pooled proportion = 0.006465 (95% CI = 0.005678 to 0.007302)

Non-combinability of studies

Cochran Q = 407.63028 (df = 35) P < 0.0001

Moment-based estimate of between studies variance = 0.011309

I<sub>2</sub> (inconsistency) = 91.4% (95% CI = 89.5% to 92.8%)

Random effects (DerSimonian-Laird)

Pooled proportion = 0.010957 (95% CI = 0.007272 to 0.015384)

Bias indicators

Begg-Mazumdar: Kendall's 0.342857 P = 0.003

Egger: bias = 1.96617 (95% CI = 1.128007 to 2.804333) P < 0.0001

Harbord: bias = 2.912658 (92.5% CI = 0.586025 to 5.239292) P = 0.0278

Proportion meta-analysis plot [random effects]

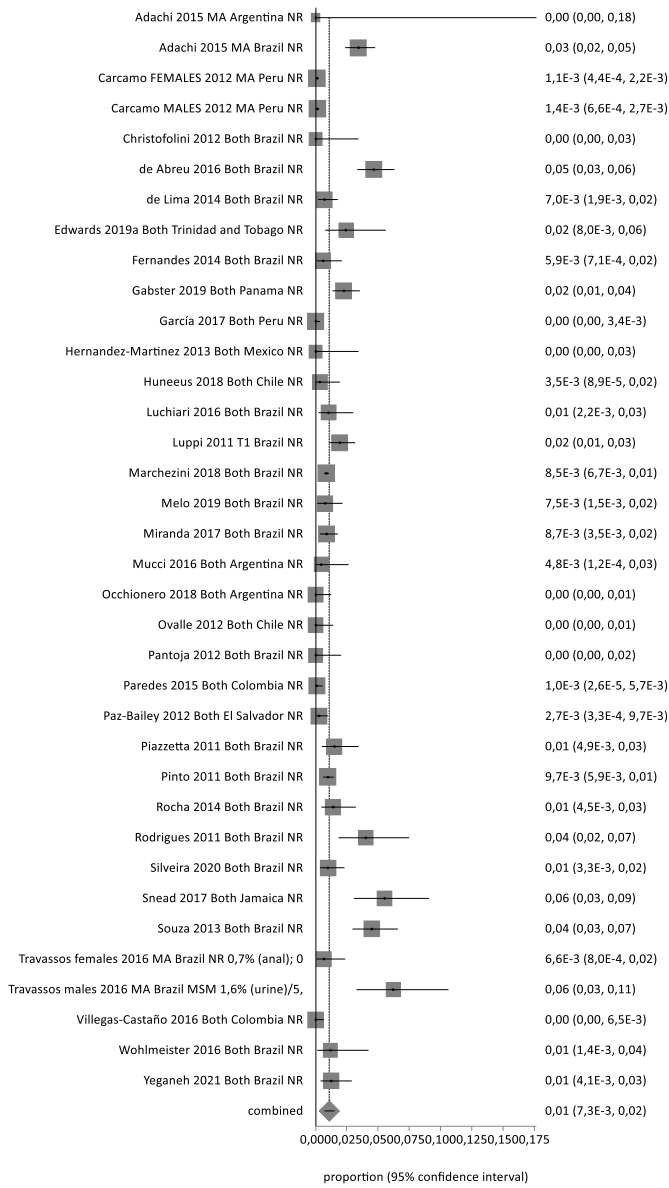

**Supplementary Material Figure S13. Symptoms. Asymptomatic population with high/not reported risk**

Fixed effects (inverse variance)

Pooled proportion = 0.04988 (95% CI = 0.04739 to 0.052429)

Non-combinability of studies

Cochran Q = 1.739,435392 (df = 45) P < .0001

Moment-based estimate of between studies variance = 0,062985

I<sub>2</sub> (inconsistency) = 97.4% (95% CI = 97.2% to 97.6%)

Random effects (DerSimonian-Laird)

Pooled proportion = 0.05366 (95% CI = 0.038076 to 0.071738)

Bias indicators

Begg-Mazumdar: Kendall's 0.33913 P = 0.0008

Egger: bias = 5.035271 (95% CI = 3.296188 to 6.74354) P < 0.0001

Harbord: bias = 0.806998 (92.5% CI = -2.804875 to 4.418871) P = 0.6856



Proportion meta-analysis plot [random effects]

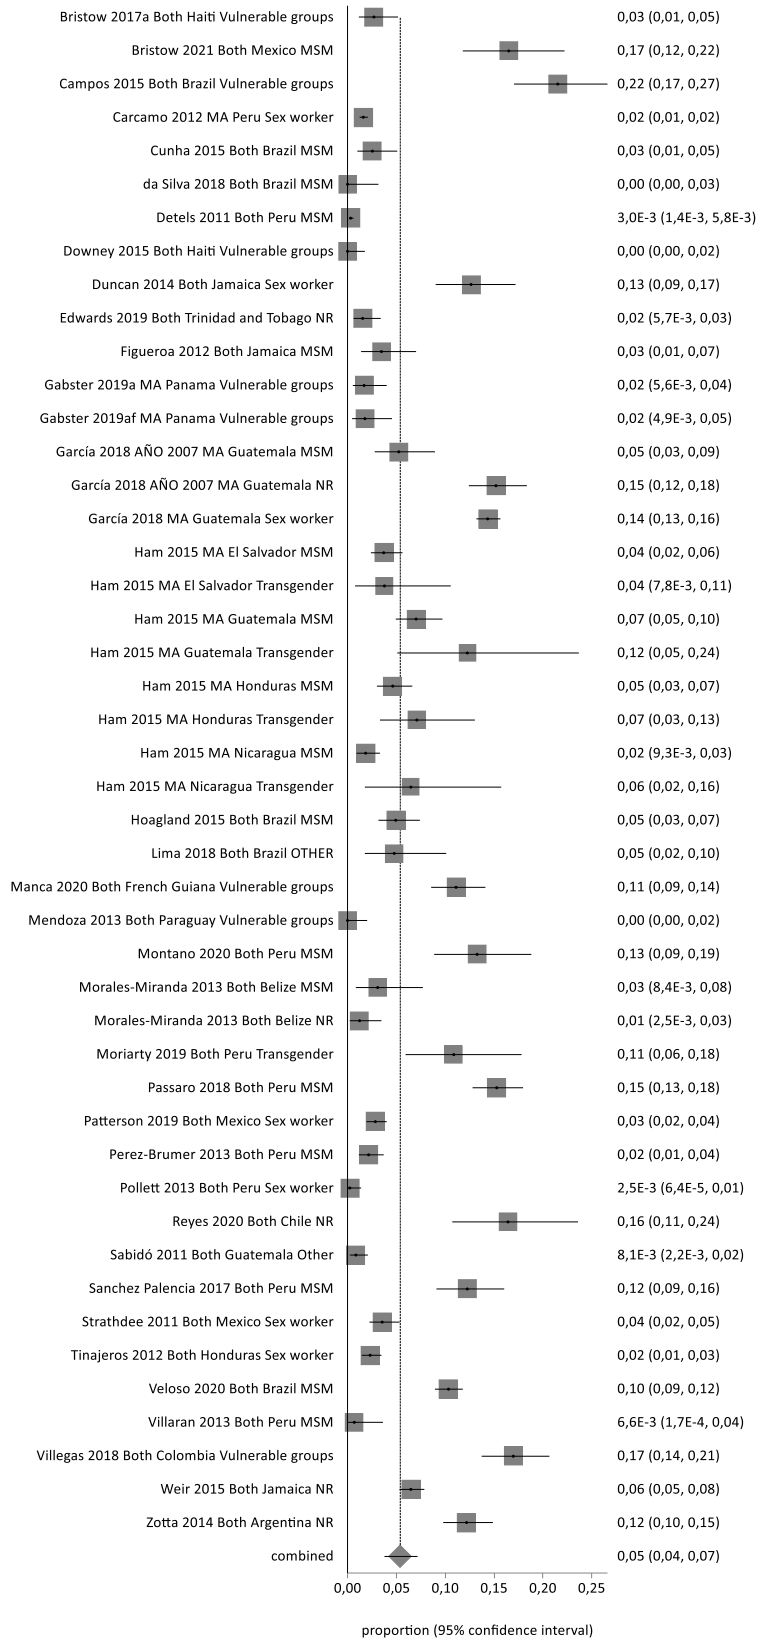

**Supplementary Material Figure S14. HIV status. HIV-positive population**

Fixed effects (inverse variance)

Pooled proportion = 0.015521 (95% CI = 0.0125 to 0.018864)

Non-combinability of studies

Cochran Q = 133.243318 (df = 16) **P < 0.0001**

Moment-based estimate of between studies variance = 0.022482

I<sub>2</sub> (inconsistency) = 88% (95% CI = 82.7% to 91.1%)

Random effects (DerSimonian-Laird)

Pooled proportion = 0.019296 (95% CI = 0.009894 to 0.031732)

Bias indicators

Begg-Mazumdar: Kendall's 0.441176 **P = 0.0134**

Egger: bias = 2.211374 (95% CI = 0.745849 to 3.676898) **P = 0.0058**

Harbord: bias = 2.381137 (92.5% CI = -2.507849 to 7.270123) **P = 0.3662**

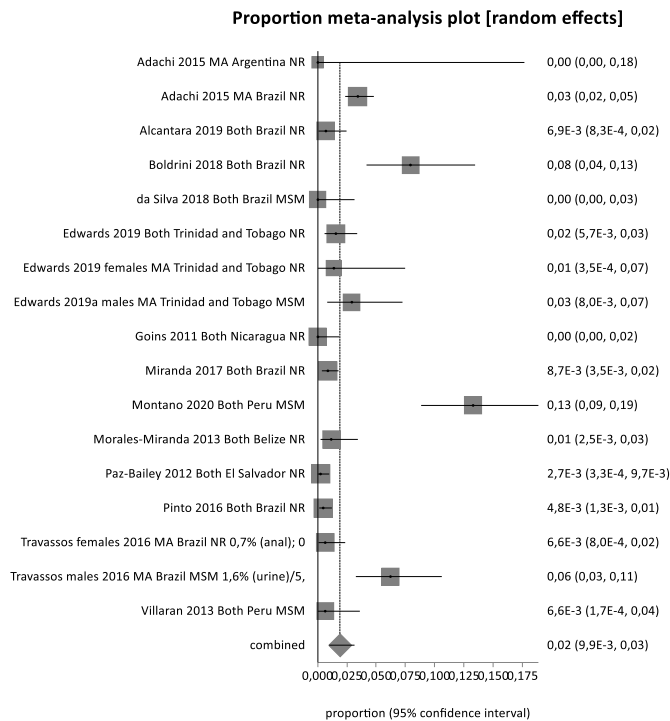

## Supplementary Material Figure S15. Pregnant women. Pregnant women with non-high risk

### Fixed effects (inverse variance)

Pooled proportion = 0.013676 (95% CI = 0.010269 to 0.017562)

### Non-combinability of studies

Cochran Q = 29.436007 (df = 5)  $P < 0.0001$

Moment-based estimate of between studies variance = 0.009778

$I^2$  (inconsistency) = 83% (95% CI = 58.5% to 90.5%)

### Random effects (DerSimonian-Laird)

Pooled proportion = 0.01162 (95% CI = 0.003682 to 0.023924)

### Bias indicators

Begg-Mazumdar: Kendall's -0.066667  $P = 0.7194$

Egger: bias = 0.720355 (95% CI = -4.229361 to 5.67007)  $P = 0.7068$

Harbord: bias = -0.797351 (92.5% CI = -6.413125 to 4.818423)  $P = 0.7512$

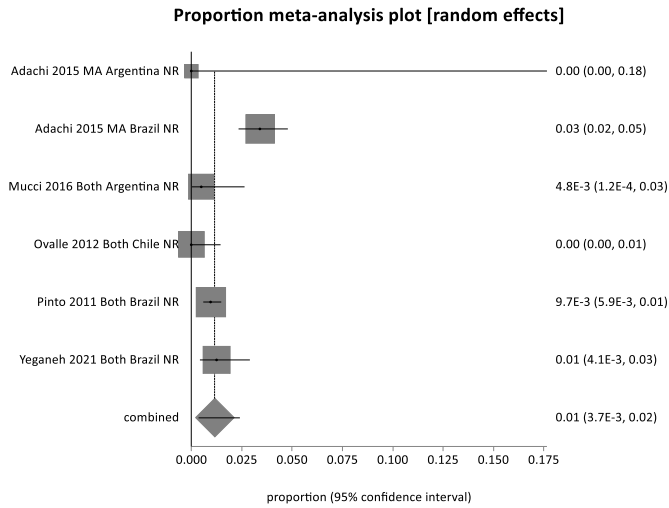

## Supplementary Material Figure S16. Pregnant women. Pregnant women with high/not reported risk

### Fixed effects (inverse variance)

Pooled proportion = 0.029815 (95% CI = 0.016743 to 0.04649)

### Non-combinability of studies

Cochran Q = 0.068195 (df = 1) P = 0.794

Moment-based estimate of between studies variance = 0

I<sub>2</sub> (inconsistency) = 0% (95% CI = \*% to \*%)

### Random effects (DerSimonian-Laird)

Pooled proportion = 0.029815 (95% CI = 0.016743 to 0.04649)

### Bias indicators

Begg-Mazumdar: Kendall's <too few strata> P = \*

Egger: bias = \* (95% CI = \* to \*) P = \*

Harbord: bias = 1.510447 (92.5% CI = \* to \*) P = \*

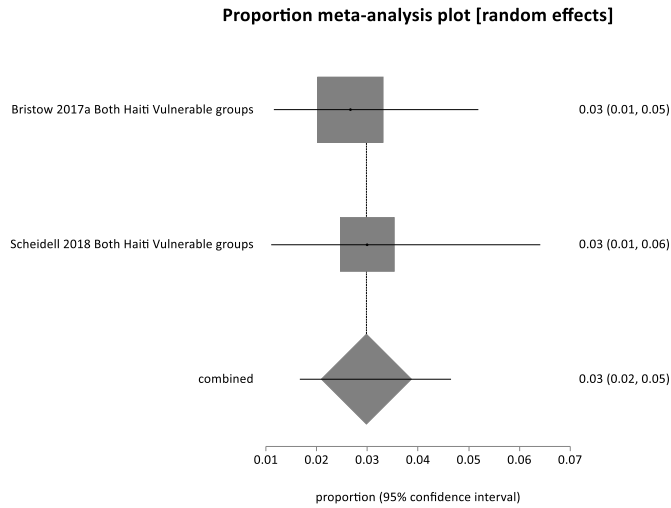

## Supplementary Material Figure S17. Biological sex. Men with non-high risk

### Fixed effects (inverse variance)

Pooled proportion = 0.005063 (95% CI = 0.003652 to 0.006703)

### Non-combinability of studies

Cochran Q = 319.255435 (df = 3)  $P < 0.0001$

Moment-based estimate of between studies variance = 0.092593

$I^2$  (inconsistency) = 99.1% (95% CI = 98.8% to 99.2%)

### Random effects (DerSimonian-Laird)

Pooled proportion = 0.026755 (95% CI = 0.000189 to 0.095914)

### Bias indicators

Begg-Mazumdar: Kendall's 0.333333  $P = 0.75$

Egger: bias = 6.261805 (95% CI = -6.98287 to 19.506481)  $P = 0.1789$

Harbord: bias = 26.876584 (92.5% CI = -53.180949 to 106.934117)  $P = 0.3672$

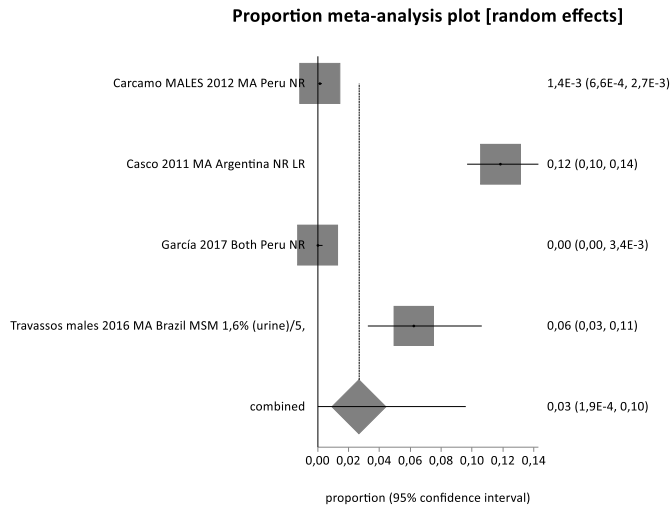

**Supplementary Material Figure S18. Biological sex. Men with high/not reported risk**

Fixed effects (inverse variance)

Pooled proportion = 0.080423 (95% CI = 0.07647 to 0.084467)

Non-combinability of studies

Cochran Q = 1.527,679721 (df = 44) P < 0.0001

Moment-based estimate of between studies variance = 0.086805

I<sub>2</sub> (inconsistency) = 97.1% (95% CI = 96.8% to 97.4%)

Random effects (DerSimonian-Laird)

Pooled proportion = 0.065727 (95% CI = 0.045556 to 0.089285)

Bias indicators

Begg-Mazumdar: Kendall's 0.418182 P < 0.0001

Egger: bias = 6.381469 (95% CI = 3.449375 to 9.313563) P < 0.0001

Harbord: bias = -4.255989 (92.5% CI = -9.257303 to 0.745324) P = 0.1278

Proportion meta-analysis plot [random effects]

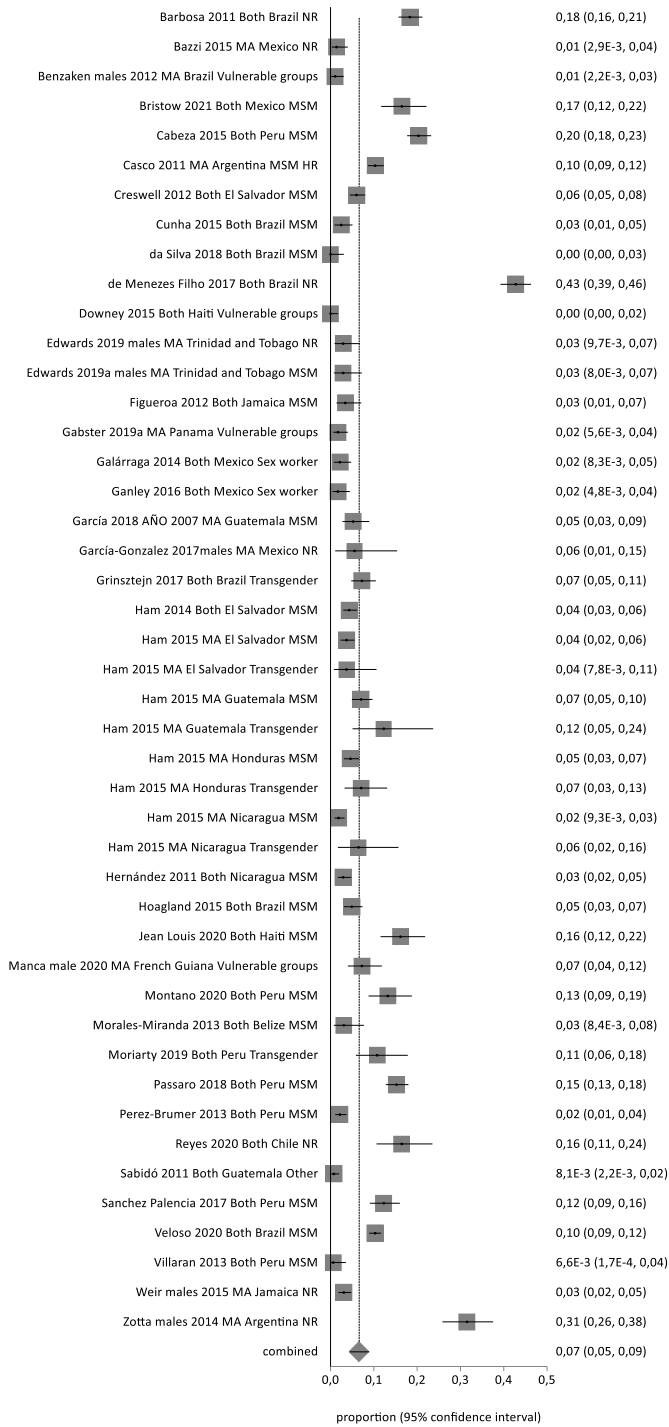

**Supplementary Material Figure S19. Biological sex. Women with non-high risk**

Fixed effects (inverse variance)

Pooled proportion = 0.008967 (95% CI = 0.007662 to 0.010373)

Non-combinability of studies

Cochran Q = 324.835149 (df = 27) P < 0.0001

Moment-based estimate of between studies variance = 0.018896

I<sub>2</sub> (inconsistency) = 91.7% (95% CI = 89.6% to 93.2%)

Random effects (DerSimonian-Laird)

Pooled proportion = 0.016055 (95% CI = 0.009757 to 0.023884)

Bias indicators

Begg-Mazumdar: Kendall's 0.185185 P = 0.1744

Egger: bias = 2.090217 (95% CI = 1.278495 to 2.901938) P < 0.0001

Harbord: bias = 3.663497 (92.5% CI = 0.657145 to 6.669849) P = 0.0324



Proportion meta-analysis plot [random effects]

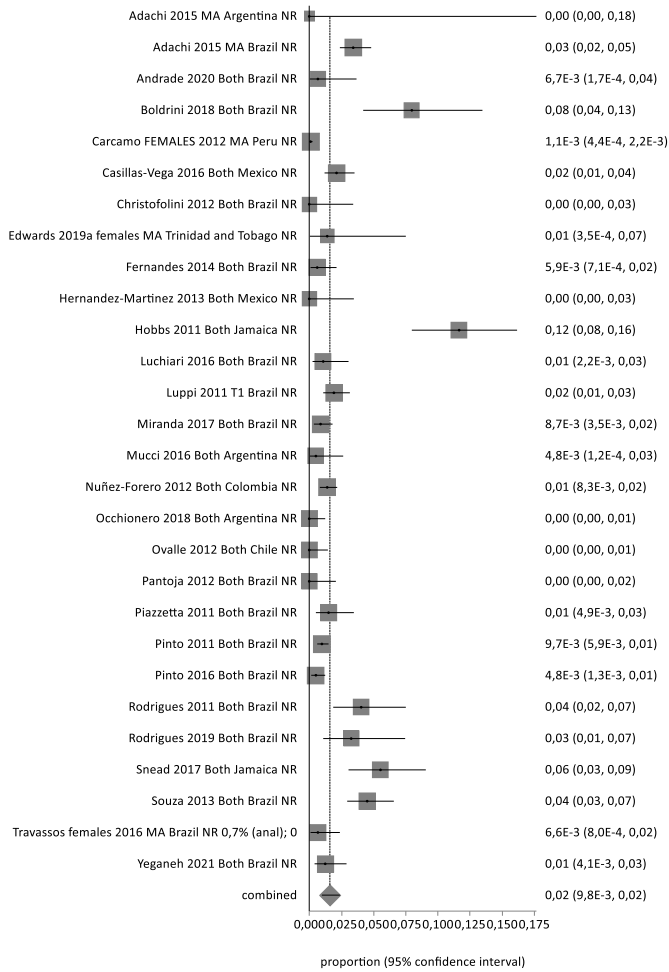

**Supplementary Material Figure S20. Biological sex. Women with high/not reported risk**

Fixed effects (inverse variance)

Pooled proportion = 0.041205 (95% CI = 0.039173 to 0.043285)

Non-combinability of studies

Cochran Q = 903.531181 (df = 21)  $P < 0.0001$

Moment-based estimate of between studies variance = 0.039341

$I^2$  (inconsistency) = 97.7% (95% CI = 97.3% to 97.9%)

Random effects (DerSimonian-Laird)

Pooled proportion = 0.037285 (95% CI = 0.022648 to 0.055382)

Bias indicators

Begg-Mazumdar: Kendall's 0.411255  $P = 0.0069$

Egger: bias = 1.291726 (95% CI = -2.625213 to 5.208665)  $P = 0.4994$

Harbord: bias = 1.127056 (92.5% CI = -3.523926 to 5.778038)  $P = 0.6539$

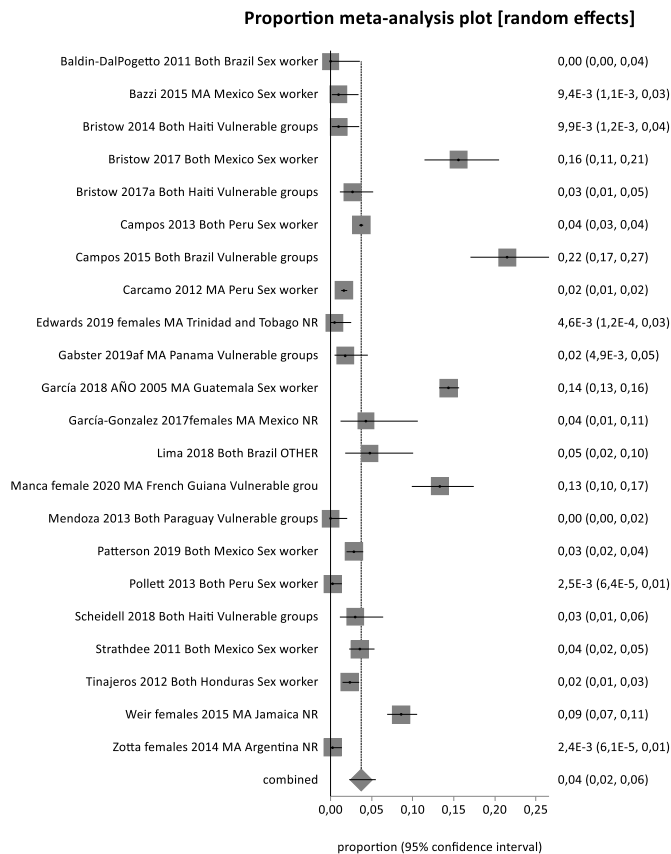

## Supplementary Material Figure S21. Risk categories. Sex workers

### Fixed effects (inverse variance)

Pooled proportion = 0.040566 (95% CI = 0.038467 to 0.042717)

### Non-combinability of studies

Cochran Q = 689.789898 (df = 12) P < 0.0001

Moment-based estimate of between studies variance = 0.036524

I<sub>2</sub> (inconsistency) = 98.3% (95% CI = 98% to 98.5%)

### Random effects (DerSimonian-Laird)

Pooled proportion = 0.037732 (95% CI = 0.019941 to 0.060873)

### Bias indicators

Begg-Mazumdar: Kendall's 0.25641 P = 0.2519

Egger: bias = 1.351749 (95% CI = -4.855828 to 7.559327) P = 0.6411

Harbord: bias = 1.351351 (92.5% CI = -6.405449 to 9.108152) P = 0.7384

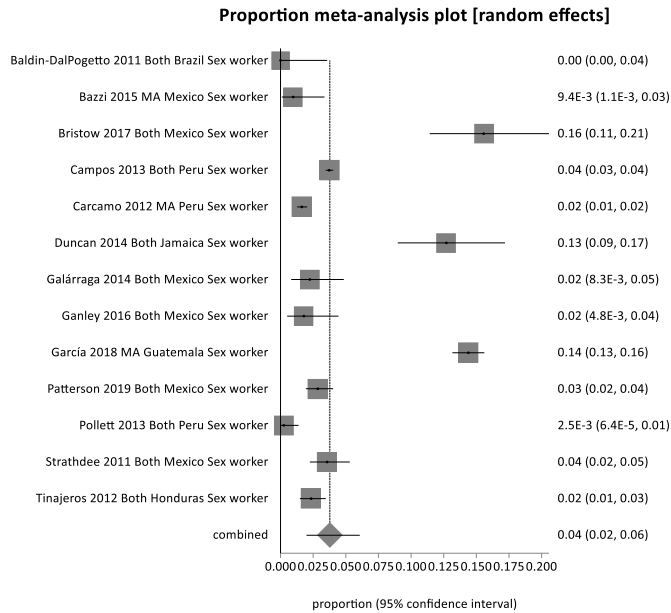

**Supplementary Material Figure S22. Risk categories. Men who have sex with men**

Pooled proportion = 0.071141 (95% CI = 0.065959 to 0.076503)

Non-combinability of studies

Cochran Q = 273.871861 (df = 17) P < 0.0001

Moment-based estimate of between studies variance = 0.030979

I<sub>2</sub> (inconsistency) = 93.8% (95% CI = 92% to 95%)

Random effects (DerSimonian-Laird)

Pooled proportion = 0.060073 (95% CI = 0.041381 to 0.081982)

Bias indicators

Begg-Mazumdar: Kendall's 0.30719 P = 0.0813

Egger: bias = 4.148286 (95% CI = -1.254437 to 9.551008) P = 0.1231

Harbord: bias = -3.676583 (92.5% CI = -8.496702 to 1.143536) P = 0.1657

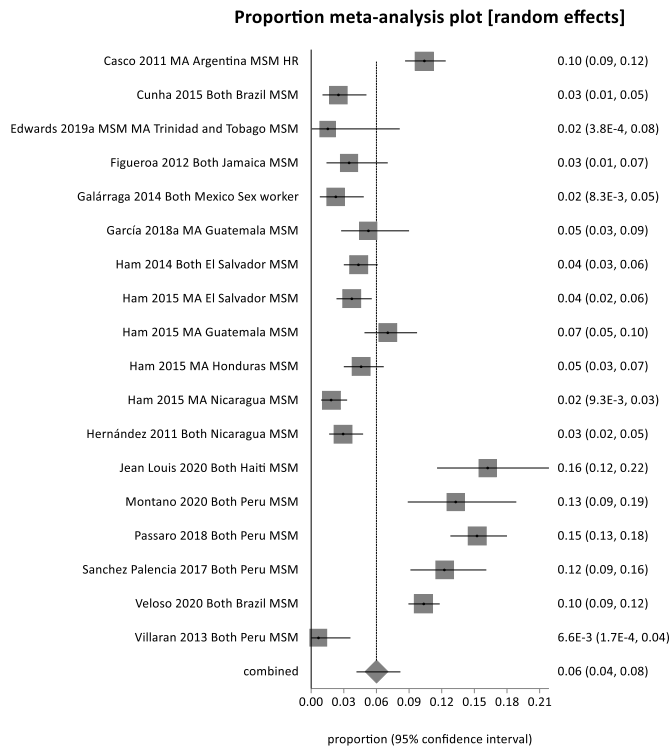

## Supplementary Material Figure S23. Risk categories. Transgender women

### Fixed effects (inverse variance)

Pooled proportion = 0.078868 (95% CI = 0.061153 to 0.098618)

### Non-combinability of studies

Cochran Q = 5.160877 (df = 5) P = 0.3966

Moment-based estimate of between studies variance = 0.000274

I<sub>2</sub> (inconsistency) = 3.1% (95% CI = 0% to 62.2%)

### Random effects (DerSimonian-Laird)

Pooled proportion = 0.079002 (95% CI = 0.060817 to 0.099335)

### Bias indicators

Begg-Mazumdar: Kendall's 0.066667 P > 0.9999

Egger: bias = 0.822058 (95% CI = -2.330975 to 3.97509) P = 0.5092

Harbord: bias = 0.449193 (92.5% CI = -2.968558 to 3.866943) P = 0.7689

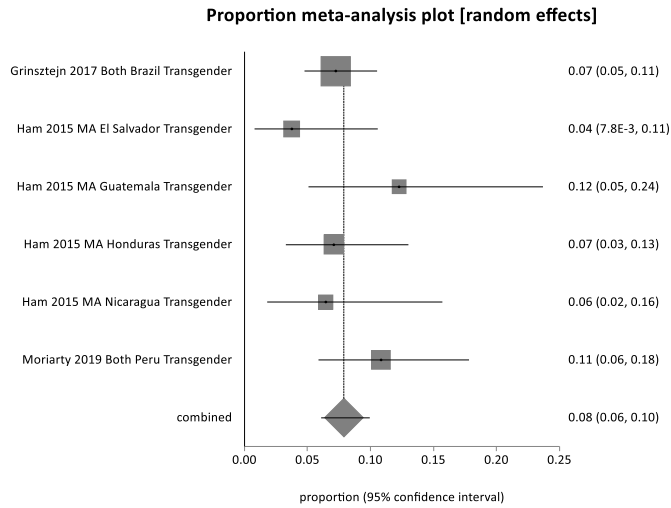

**Supplementary Material Figure S24. Risk categories. Vulnerable groups**

Fixed effects (inverse variance)

Pooled proportion = 0.098096 (95% CI = 0.089193 to 0.107376)

Non-combinability of studies

Cochran Q = 934.184336 (df = 10) P < 0.0001

Moment-based estimate of between studies variance = 0.25394

I<sub>2</sub> (inconsistency) = 98.9% (95% CI = 98.8% to 99.1%)

Random effects (DerSimonian-Laird)

Pooled proportion = 0.05857 (95% CI = 0.008917 to 0.147588)

Bias indicators

Begg-Mazumdar: Kendall's 0.818182 P = 0.0001

Egger: bias = 12.541895 (95% CI = 4.366709 to 20.71708) P = 0.007

Harbord: bias = -27.11519 (92.5% CI = -48.954111 to -5.276269) P = 0.0339

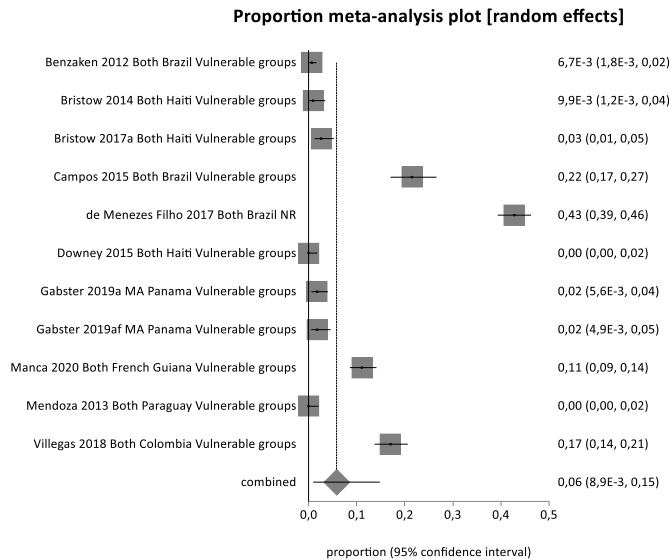

**Supplementary Material Figure S25. Sample type. Urine sample. Women with non-high risk**

Fixed effects (inverse variance)

Pooled proportion = 0.012505 (95% CI = 0.010229 to 0.015005)

Non-combinability of studies

Cochran Q = 61.631074 (df = 10) P < 0.0001

Moment-based estimate of between studies variance = 0,007238

I<sub>2</sub> (inconsistency) = 83.8% (95% CI = 71.4% to 89.3%)

Random effects (DerSimonian-Laird)

Pooled proportion = 0.012568 (95% CI = 0.00685 to 0.01998)

Bias indicators

Begg-Mazumdar: Kendall's 0.127273 P = 0.6481

Egger: bias = 2.333971 (95% CI = 0.017342 to 4.6506) P = 0.0486

Harbord: bias = -0.374398 (92.5% CI = -4.303191 to 3.554394) P = 0.8522

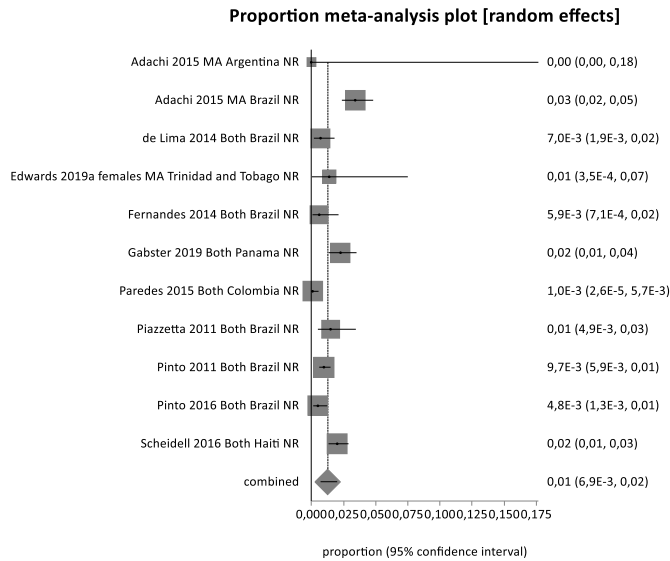

**Supplementary Material Figure S26. Sample type. Urine sample. Women with high/not reported risk**

Fixed effects (inverse variance)

Pooled proportion = 0.03353 (95% CI = 0.027225 to 0.040465)

Non-combinability of studies

Cochran Q = 47.568804 (df = 5) P < 0.0001

Moment-based estimate of between studies variance = 0.019702

I<sup>2</sup> (inconsistency) = 89.5% (95% CI = 79.3% to 93.5%)

Random effects (DerSimonian-Laird)

Pooled proportion = 0.036869 (95% CI = 0.017604 to 0.062825)

Bias indicators

Begg-Mazumdar: Kendall's 0.333333 P = 0.4694

Egger: bias = 3.788139 (95% CI = -2.363532 to 9.939811) P = 0.1625

Harbord: bias = 3.497402 (92.5% CI = -10.449375 to 17.44418) P = 0.5809

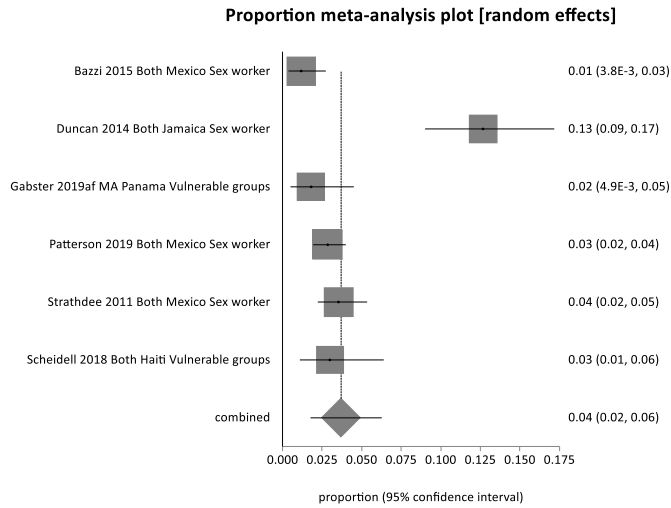



**Supplementary Material Figure S27. Sample type. Vaginal/endocervical sample. Women with non-high risk**

Fixed effects (inverse variance)

Pooled proportion = 0.019775 (95% CI = 0.017043 to 0.022706)

Non-combinability of studies

Cochran Q = 166.793947 (df = 22) P < 0.0001

Moment-based estimate of between studies variance = 0,016729

I<sub>2</sub> (inconsistency) = 86.8% (95% CI = 81.8% to 89.9%)

Random effects (DerSimonian-Laird)

Pooled proportion = 0.019538 (95% CI = 0.0123 to 0.028403)

Bias indicators

Begg-Mazumdar: Kendall's 0.44664 P = 0.0024

Egger: bias = 3.37231 (95% CI = 1.692683 to 5.051937) P = 0.0004

Harbord: bias = 0.863183 (92.5% CI = -3.211478 to 4.937843) P = 0.6955

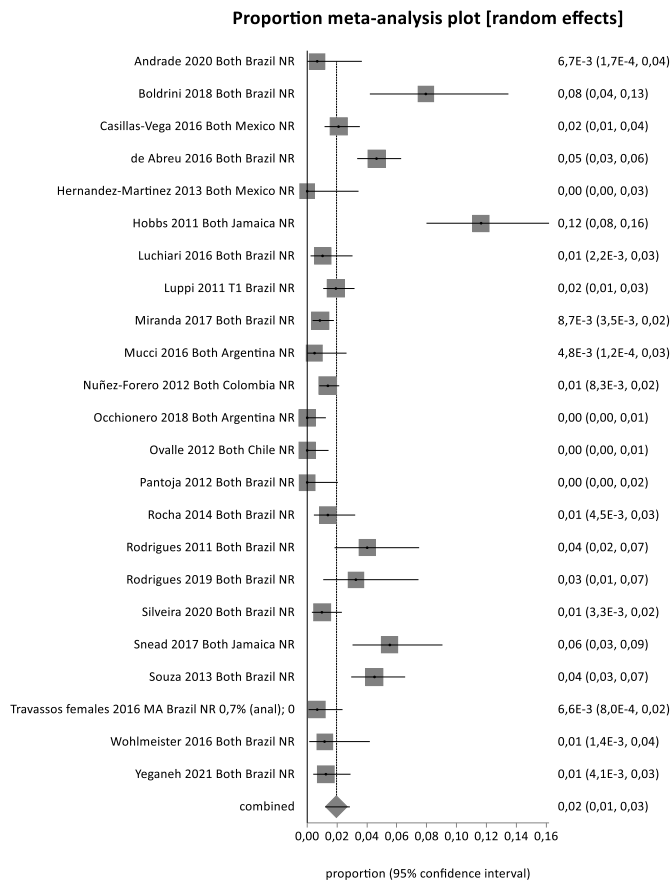

**Supplementary Material Figure S28. Sample type. Vaginal/endocervical sample. Women with high/not reported risk**

Fixed effects (inverse variance)

Pooled proportion = 0.040945 (95% CI = 0.038824 to 0.043121)

Non-combinability of studies

Cochran Q = 862.790748 (df = 15) P < 0.0001

Moment-based estimate of between studies variance = 0.047153

I<sub>2</sub> (inconsistency) = 98.3% (95% CI = 98% to 98.5%)

Random effects (DerSimonian-Laird)

Pooled proportion = 0.038381 (95% CI = 0.020013 to 0.062378)

Bias indicators

Begg-Mazumdar: Kendall's 0,483333 P = 0.0086

Egger: bias = 1.378629 (95% CI = -4.167144 to 6.924401) P = 0.6023

Harbord: bias = 1.86011 (92.5% CI = -4.489311 to 8.209532) P = 0.582

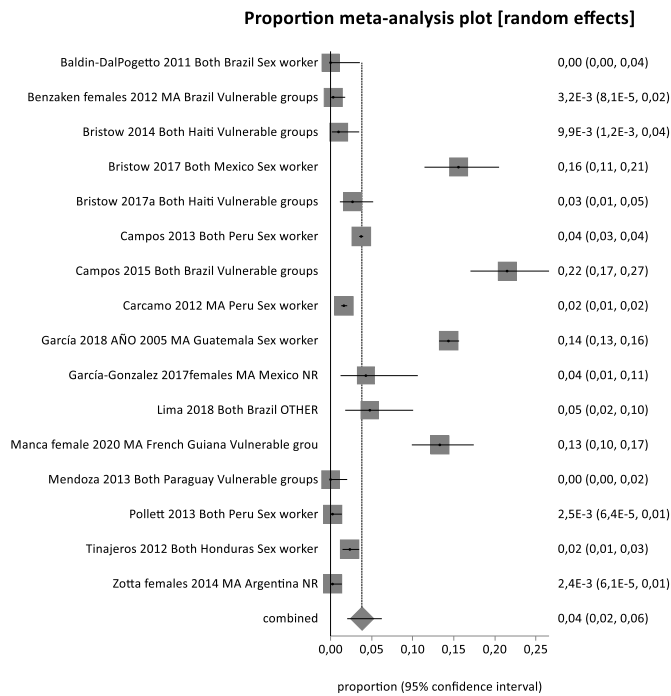

**Supplementary Material Figure S29. Age. 15–29 years**

Fixed effects (inverse variance)

Pooled proportion = 0.008439 (95% CI = 0.007398 to 0.009548)

Non-combinability of studies

Cochran Q = 500.558889 (df = 10) P < 0.0001

Moment-based estimate of between studies variance = 0.029169

I<sub>2</sub> (inconsistency) = 98% (95% CI = 97.6% to 98.3%)

Random effects (DerSimonian-Laird)

Pooled proportion = 0.013936 (95% CI = 0.004428 to 0.028642)

Bias indicators

Begg-Mazumdar: Kendall's 0.381818 P = 0.121

Egger: bias = 3.318433 (95% CI = -0.845929 to 7.482794) P = 0.105

Harbord: bias = 5.80984 (92.5% CI = -8.39909 to 20.018771) P = 0.4318

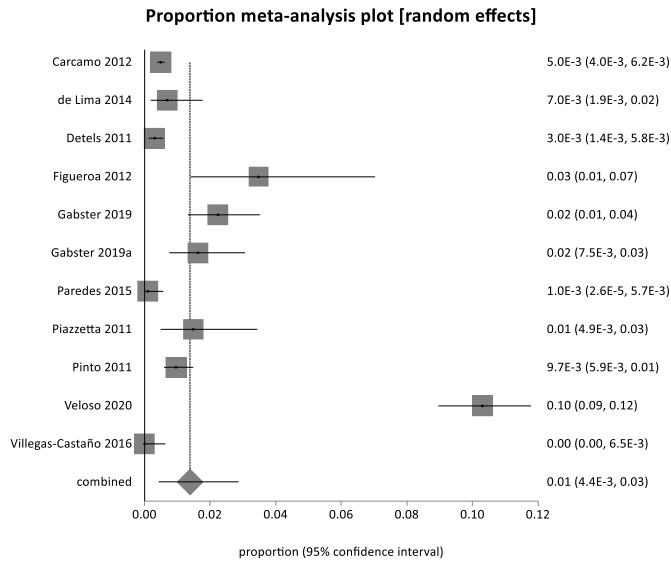

### Supplementary Material Figure S30. Age. 30–50 years

#### Fixed effects (inverse variance)

Pooled proportion = 0.00744 (95% CI = 0.003577 to 0.012689)

#### Non-combinability of studies

Cochran Q = 9.256797 (df = 2) P = 0.0098

Moment-based estimate of between studies variance = 0.008889

I<sub>2</sub> (inconsistency) = 78.4% (95% CI = 0% to 91.3%)

#### Random effects (DerSimonian-Laird)

Pooled proportion = 0.009796 (95% CI = 0.001493 to 0.025263)

#### Bias indicators

Begg-Mazumdar: Kendall's <too few strata> P = \*

Egger: bias = \* (95% CI = \* to \*) P = \*

Harbord: bias = 7.976086 (92.5% CI = -42.465189 to 58.417362) P = 0.4091

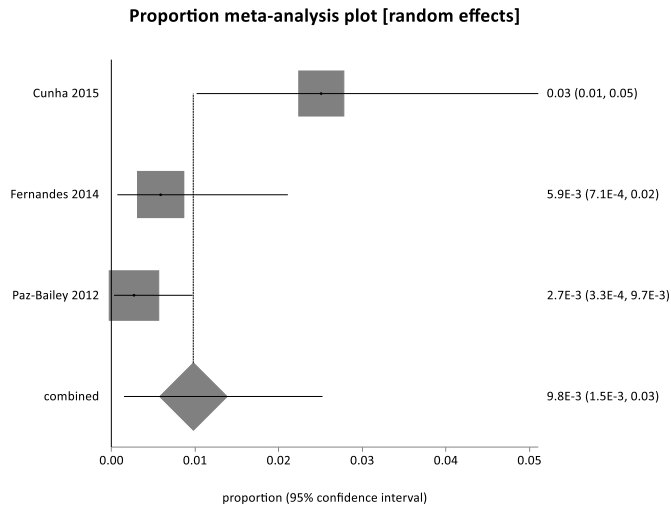

**Supplementary Material Figure S31. Age. 18–50 years**

Fixed effects (inverse variance)

Pooled proportion = 0.019709 (95% CI = 0.016193 to 0.023562)

Non-combinability of studies

Cochran Q = 101.686303 (df = 11) P < 0.0001

Moment-based estimate of between studies variance = 0,019149

I<sub>2</sub> (inconsistency) = 89.2% (95% CI = 83.4% to 92.3%)

Random effects (DerSimonian-Laird)

Pooled proportion = 0.021265 (95% CI = 0.010768 to 0.035202)

Bias indicators

Begg-Mazumdar: Kendall's 0.484848 P = 0.0311

Egger: bias = 3.109832 (95% CI = 0.503366 to 5.716299) P = 0.024

Harbord: bias = 2.221748 (92.5% CI = -5.39476 to 9.838257) P = 0.575

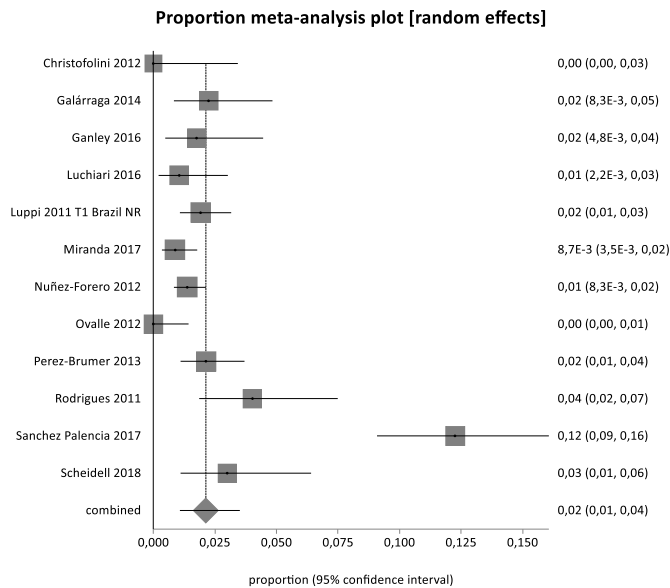

## Supplementary Material Figure S32. Studies reporting more than one anatomical site of infection.

### Gonocervicitis

#### Fixed effects (inverse variance)

Pooled proportion = 0.065241 (95% CI = 0.034936 to 0.104119)

#### Non-combinability of studies

Cochran Q = 20.361252 (df = 6) P = 0.0024

Moment-based estimate of between studies variance = 0.100446

I<sub>2</sub> (inconsistency) = 70.5% (95% CI = 13.4% to 84.7%)

#### Random effects (DerSimonian-Laird)

Pooled proportion = 0.109609 (95% CI = 0.034614 to 0.219617)

#### Bias indicators

Begg-Mazumdar: Kendall's 0.52381 P = 0.1361

Egger: bias = 1.679467 (95% CI = 0.364853 to 2.994082) P = 0.0219

Harbord: bias = 3.343638 (92.5% CI = -0.201762 to 6.889037) P = 0.0881

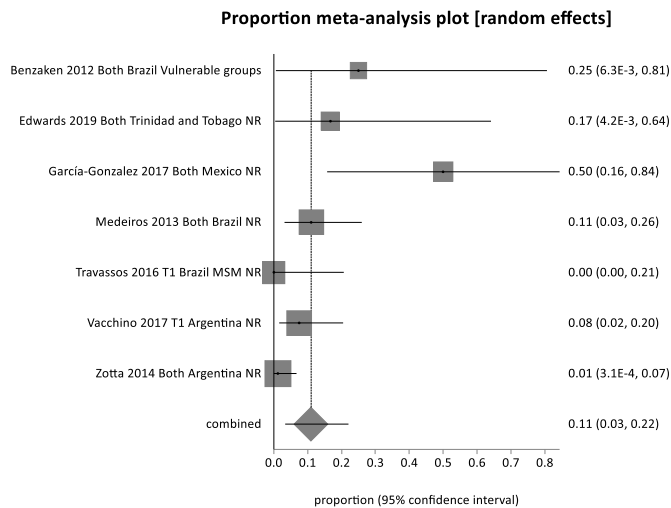

**Supplementary Material Figure S33. Studies reporting more than one anatomical site of infection.**

**Positive cervical swab**

Fixed effects (inverse variance)

Pooled proportion = 0.067966 (95% CI = 0.038995 to 0.104222)

Non-combinability of studies

Cochran Q = 0 (df = 0) P = \*

Moment-based estimate of between studies variance = 0

I<sub>2</sub> (inconsistency) = % (95% CI = % to %)

Random effects (DerSimonian-Laird)

Pooled proportion = 0.067966 (95% CI = 0.038995 to 0.104222)

Bias indicators

Begg-Mazumdar: Kendall's <too few strata> P = \*

Egger: bias = \* (95% CI = \* to \*) P = \*

Harbord: bias = \* (92.5% CI = \* to \*) P = \*

**Proportion meta-analysis plot [random effects]**

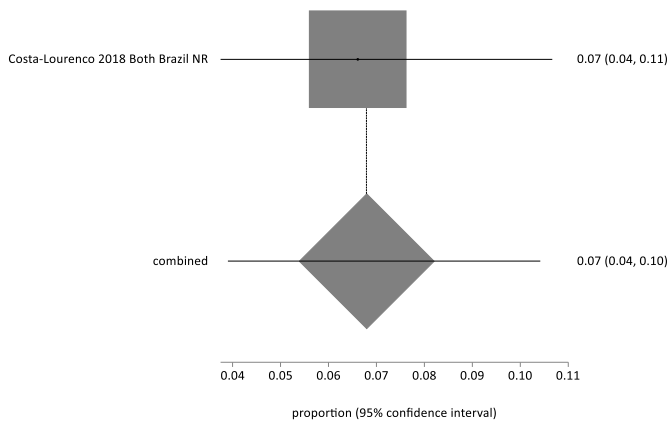

**Supplementary Material Figure S34. Studies reporting more than one anatomical site of infection.**

**Gono-urethritis**

Fixed effects (inverse variance)

Pooled proportion = 0.594601 (95% CI = 0.585466 to 0.603705)

Non-combinability of studies

Cochran Q = 9,284.134223 (df = 17) P < 0.0001

Moment-based estimate of between studies variance = 1.401053

I<sub>2</sub> (inconsistency) = 99.8% (95% CI = 99.8% to 99.8%)

Random effects (DerSimonian-Laird)

Pooled proportion = 0.42026 (95% CI = 0.172219 to 0.692219)

Bias indicators

Begg-Mazumdar: Kendall's 0.385621 P = 0.0264

Egger: bias = -16.71634 (95% CI = -37.603803 to 4.171123) P = 0.1091

Harbord: bias = -3.435706 (92.5% CI = -14.362001 to 7.490589) P = 0.5577

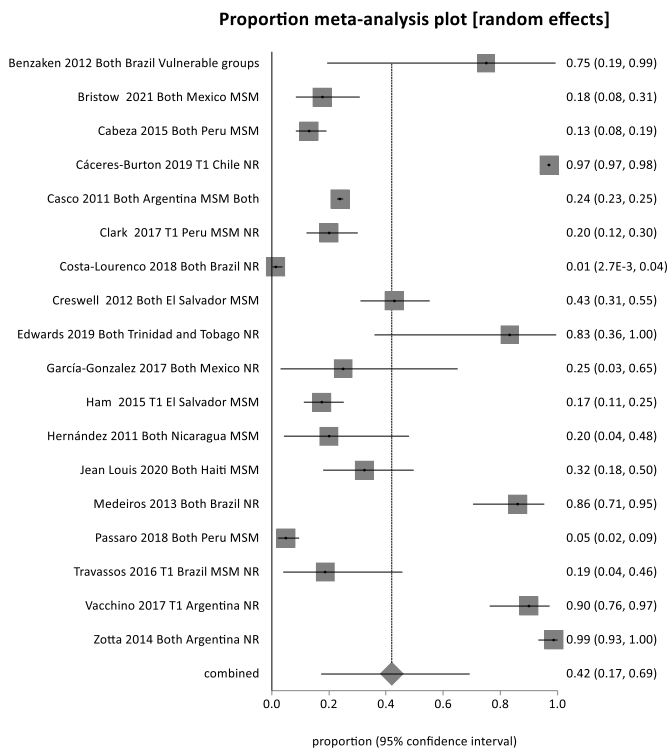



## Supplementary Material Figure S35. Studies reporting more than one anatomical site of infection.

### Positive urethral swab/urine sample

#### Fixed effects (inverse variance)

Pooled proportion = 0.003622 (95% CI = 0.00224 to 0.005332)

#### Non-combinability of studies

Cochran Q = 478.437165 (df = 4) P < 0.0001

Moment-based estimate of between studies variance = 0.549192

I<sup>2</sup> (inconsistency) = 99.2% (95% CI = 99% to 99.3%)

#### Random effects (DerSimonian-Laird)

Pooled proportion = 0.13143 (95% CI = 0.001489 to 0.418335)

#### Bias indicators

Begg-Mazumdar: Kendall's 0.2 P = 0.8167

Egger: bias = 5.023264 (95% CI = -3.139493 to 13.186022) P = 0.1451

Harbord: bias = 38.914525 (92.5% CI = -36.617389 to 114.446439) P = 0.2611

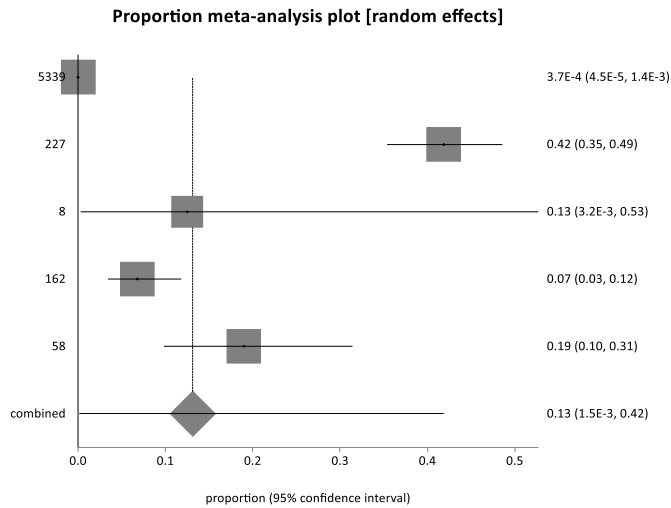

**Supplementary Material Figure S36. Studies reporting more than one anatomical site of infection.**

**Gono-rectitis**

Fixed effects (inverse variance)

Pooled proportion = 0.044475 (95% CI = 0.039302 to 0.049951)

Non-combinability of studies

Cochran Q = 1,724.251472 (df = 11) P < 0.0001

Moment-based estimate of between studies variance = 0.87045

I<sup>2</sup> (inconsistency) = 99.4% (95% CI = 99.3% to 99.4%)

Random effects (DerSimonian-Laird)

Pooled proportion = 0.459817 (95% CI = 0.211943 to 0.71886)

Bias indicators

Begg-Mazumdar: Kendall's -0.060606 P = 0.7373

Egger: bias = 9.40069 (95% CI = 6.423898 to 12.377482) P < 0.0001

Harbord: bias = 23.96246 (92.5% CI = 14.982495 to 32.942426) P = 0.0003

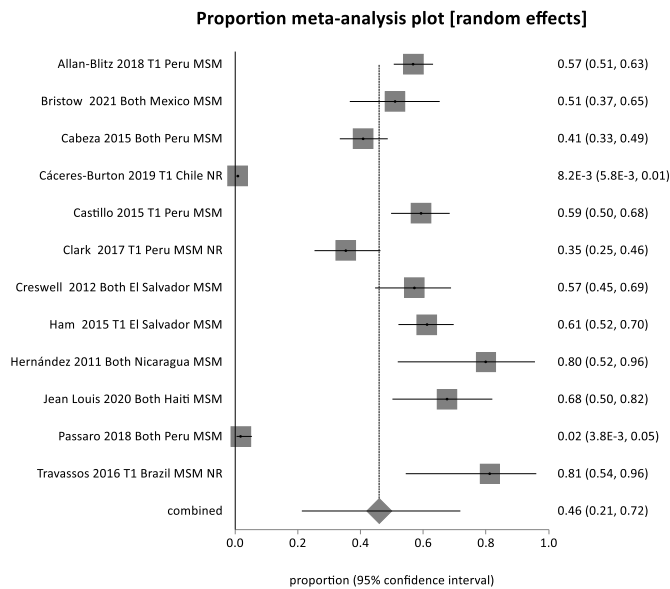

**Supplementary Material Figure S37. Studies reporting more than one anatomical site of infection.**

**Positive rectal swab**

Fixed effects (inverse variance)

Pooled proportion = 0.181632 (95% CI = 0.171807 to 0.191669)

Non-combinability of studies

Cochran Q = 142.550667 (df = 3) P < 0.0001

Moment-based estimate of between studies variance = 0.164535

I<sub>2</sub> (inconsistency) = 97.9% (95% CI = 97% to 98.4%)

Random effects (DerSimonian-Laird)

Pooled proportion = 0.189189 (95% CI = 0.059878 to 0.368927)

Bias indicators

Begg-Mazumdar: Kendall's -0.333333 P = 0.3333

Egger: bias = 1.995232 (95% CI = -46.300745 to 50.291209) P = 0.8753

Harbord: bias = 1.059069 (92.5% CI = -15.768682 to 17.88682) P = 0.8486

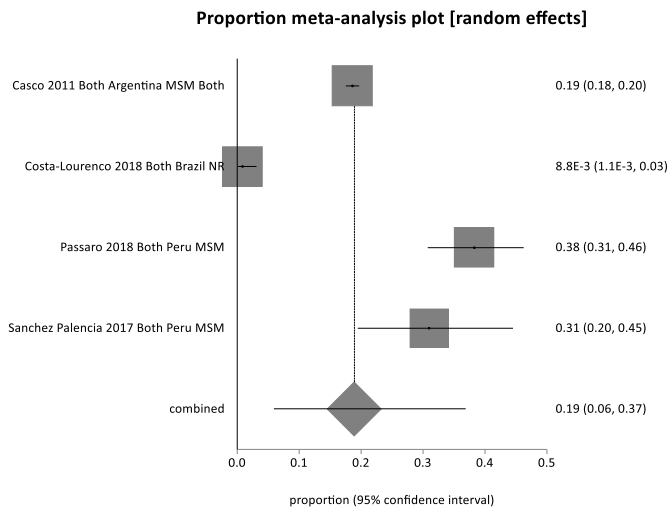

## Supplementary Material Figure S38. Studies reporting more than one anatomical site of infection.

### Gono-pharyngitis

#### Fixed effects (inverse variance)

Pooled proportion = 0.050246 (95% CI = 0.044688 to 0.056112)

#### Non-combinability of studies

Cochran Q = 1,043.213239 (df = 7) P < 0.0001

Moment-based estimate of between studies variance = 0.59723

I<sup>2</sup> (inconsistency) = 99.3% (95% CI = 99.2% to 99.4%)

#### Random effects (DerSimonian-Laird)

Pooled proportion = 0.326204 (95% CI = 0.110185 to 0.591517)

#### Bias indicators

Begg-Mazumdar: Kendall's -0.142857 P = 0.5484

Egger: bias = 9.098992 (95% CI = 5.809111 to 12.388874) P = 0.0005

Harbord: bias = 23.314506 (92.5% CI = 13.718283 to 32.910729) P = 0.002

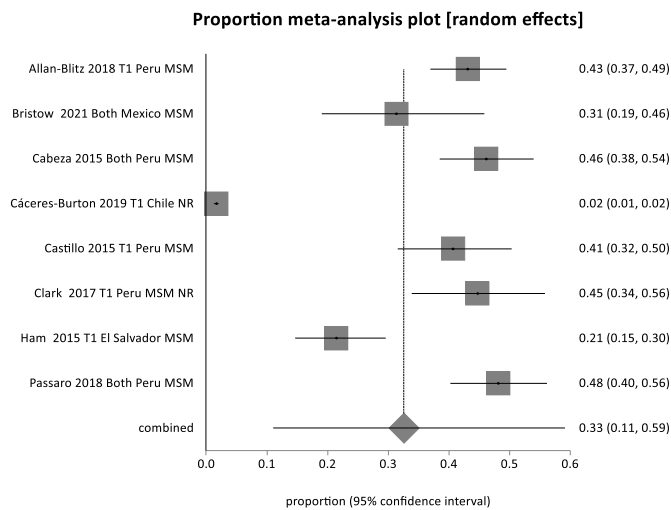

## Supplementary Material Figure S39. Studies reporting more than one anatomical site of infection.

### Positive pharyngeal swab

#### Fixed effects (inverse variance)

Pooled proportion = 0.196931 (95% CI = 0.186431 to 0.207646)

#### Non-combinability of studies

Cochran Q = 25.07914 (df = 1) P < 0.0001

Moment-based estimate of between studies variance = 0.208059

I<sup>2</sup> (inconsistency) = 96% (95% CI = \*% to \*%)

#### Random effects (DerSimonian-Laird)

Pooled proportion = 0.332311 (95% CI = 0.082903 to 0.649028)

#### Bias indicators

Begg-Mazumdar: Kendall's <too few strata> P = \*

Egger: bias = \* (95% CI = \* to \*) P = \*

Harbord: bias = 6.540975 (92.5% CI = \* to \*) P = \*

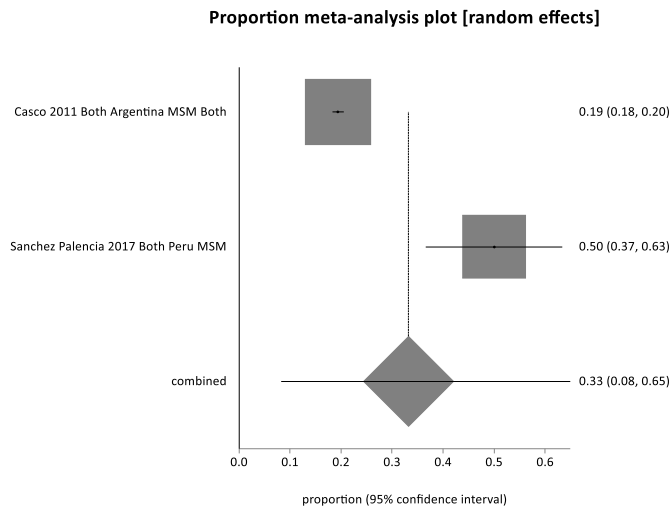

**Supplementary Material Figure S40. Studies reporting more than one anatomical site of infection.**

**Gono conjunctivitis**

Fixed effects (inverse variance)

Pooled proportion = 0.004468 (95% CI = 0.002768 to 0.006569)

Non-combinability of studies

Cochran Q = 5.111542 (df = 2) P = 0.0776

Moment-based estimate of between studies variance = 0.020455

I<sub>2</sub> (inconsistency) = 60.9% (95% CI = 0% to 86.9%)

Random effects (DerSimonian-Laird)

Pooled proportion = 0.015777 (95% CI = 0.00055 to 0.051279)

Bias indicators

Begg-Mazumdar: Kendall's <too few strata> P = \*

Egger: bias = \* (95% CI = \* to \*) P = \*

Harbord: bias = 2.262194 (92.5% CI = 1.619113 to 2.905274) P = 0.0214

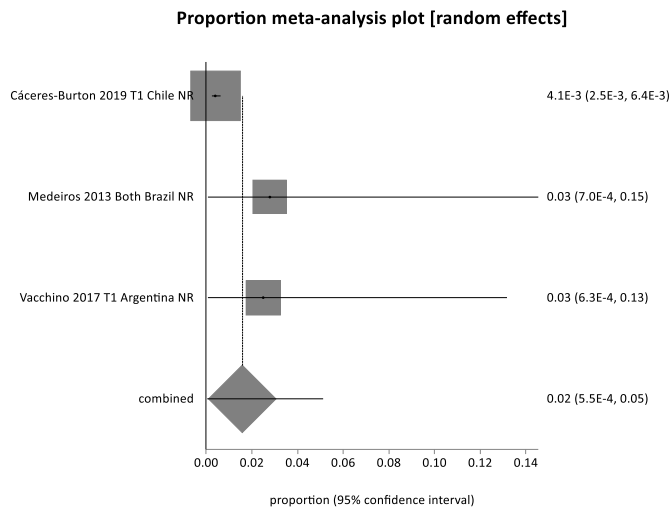

## Supplementary Material Figure S41. Asymptomatic carriers

### Fixed effects (inverse variance)

Pooled proportion = 0.613384 (95% CI = 0.597546 to 0.629103)

### Non-combinability of studies

Cochran Q = 264.84065 (df = 3) P < 0.0001

Moment-based estimate of between studies variance = 0.404709

I<sup>2</sup> (inconsistency) = 98.9% (95% CI = 98.5% to 99.1%)

### Random effects (DerSimonian-Laird)

Pooled proportion = 0.728621 (95% CI = 0.397316 to 0.957725)

### Bias indicators

Begg-Mazumdar: Kendall's  $\tau$  P = 0.75

Egger: bias = -7.8612 (95% CI = -96.307914 to 80.585514) P = 0.739

Harbord: bias = 0.460977 (92.5% CI = -21.102569 to 22.024523) P = 0.948

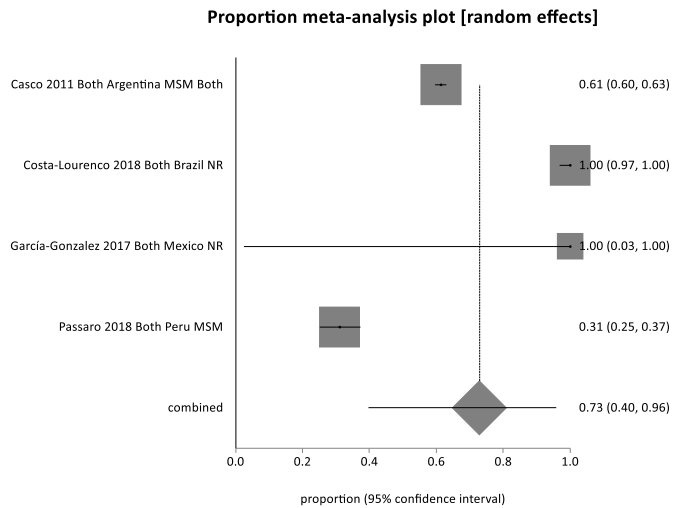

**Supplementary Material Figure S42. Incidence: Gonorrhoea cases per 100 person-years.**

**Summary meta-analysis**

| Study | * Difference | SE       | Approximate 95% CI |      |                                    |
|-------|--------------|----------|--------------------|------|------------------------------------|
| 1     | 2.53         | 0.798484 | 0.96               | 4.09 | Bazzi 2015 MA Mexico Sex worker    |
| 2     | 0.89         | 0.456641 | 0.12               | 1.91 | Bazzi 2015 MA Mexico NR            |
| 3     | 3.93         | 1.517885 | 1.88               | 7.83 | Ganley 2016 Both Mexico Sex worker |

CI, confidence interval; NR, not reported

| Stratum | Standardized effect | Standard Error | % Weights (fixed, random) |           |                                    |
|---------|---------------------|----------------|---------------------------|-----------|------------------------------------|
| 1       | 2.53                | 0.798484       | 23.071549                 | 35.451906 | Bazzi 2015 MA Mexico Sex worker    |
| 2       | 0.89                | 0.456641       | 70.543883                 | 45.385885 | Bazzi 2015 MA Mexico NR            |
| 3       | 3.93                | 1.517885       | 6.384568                  | 19.162208 | Ganley 2016 Both Mexico Sex worker |

Fixed effects (inverse variance)

Pooled \* difference = 1.462464 (95% CI = 0.71075 to 2.214178)

Z (test \* Difference differs from 0) = 3.813121 P = 0.0001

Non-combinability of studies

Cochran Q = 6.001769 (df = 2) P = 0.0497

Moment-based estimate of between studies variance = 1.322672

I<sub>2</sub> (inconsistency) = 66.7% (95% CI = 0% to 88.3%)

Random effects (DerSimonian-Laird)

Pooled \* difference = 2.053942 (95% CI = 0.42005 to 3.687835)

Z (test \* Difference) = 2.463842 P = 0.0137

Bias indicators

Begg-Mazumdar: Kendall's <too few strata> P = \*

Egger: bias = \* (95% CI = \* to \*) P = \*



Summary meta-analysis plot [random effects]

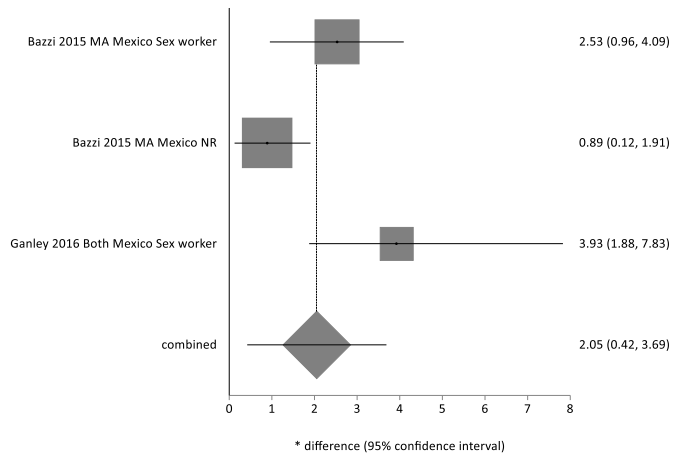

**Supplementary Material Figure S43. Burden of gonorrhoea in five years. Period 2010–2019. Prevalence of gonorrhoea in the non-high-risk population from 2010 to 2014**

Fixed effects (inverse variance)

Pooled proportion = 0.018205 (95% CI = 0.016335 to 0.020174)

Non-combinability of studies

Cochran Q = 1.370,764157 (df = 20) P < 0.0001

Moment-based estimate of between studies variance = 0.094343

I<sub>2</sub> (inconsistency) = 98.5% (95% CI = 98.4% to 98.7%)

Random effects (DerSimonian-Laird)

Pooled proportion = 0.027315 (95% CI = 0.009848 to 0.053166)

Bias indicators

Begg-Mazumdar: Kendall's 0.495238 P = 0.0013

Egger: bias = 4.381767 (95% CI = 1.21027 to 7.553264) P = 0.0093

Harbord: bias = 5.950532 (92.5% CI = -8.610824 to 20.511888) P = 0.4509

### Proportion meta-analysis plot [random effects]

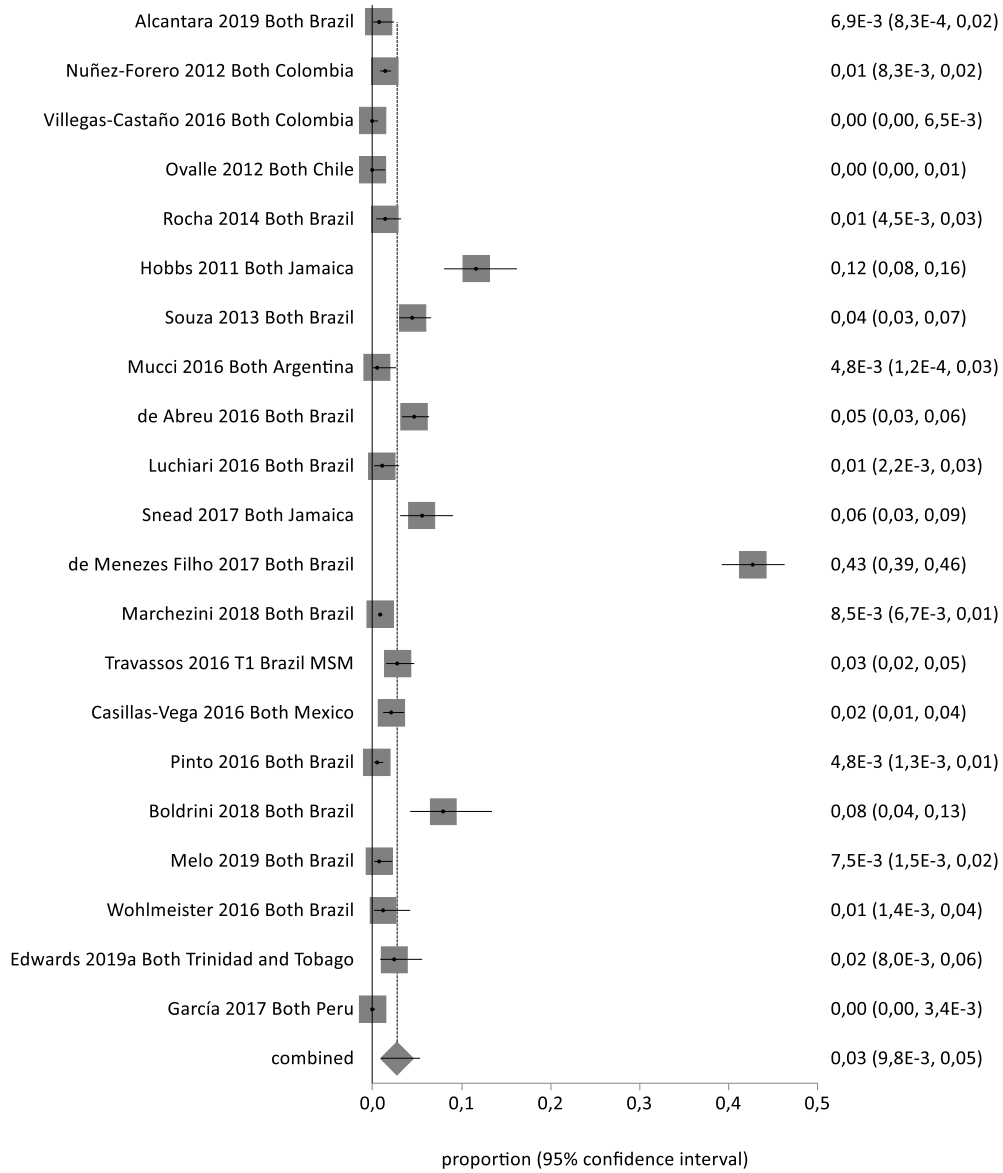

**Supplementary Material Figure S44. Burden of gonorrhoea in five years. Period 2010–2019. Prevalence of gonorrhoea in the non-high-risk population from 2015 to 2019**

Fixed effects (inverse variance)

Pooled proportion = 0.014857 (95% CI = 0.010716 to 0.019661)

Non-combinability of studies

Cochran Q = 8.752636 (df = 5) P = 0.1193

Moment-based estimate of between studies variance = 0.001715

I<sub>2</sub> (inconsistency) = 42.9% (95% CI = 0% to 75.9%)

Random effects (DerSimonian-Laird)

Pooled proportion = 0.015054 (95% CI = 0.009385 to 0.022031)

Bias indicators

Begg-Mazumdar: Kendall's 0.333333 P = 0.4694

Egger: bias = 1.29618 (95% CI = -2.0009 to 4.59326) P = 0.3364

Harbord: bias = 0.541323 (92.5% CI = -4.513584 to 5.596229) P = 0.8105

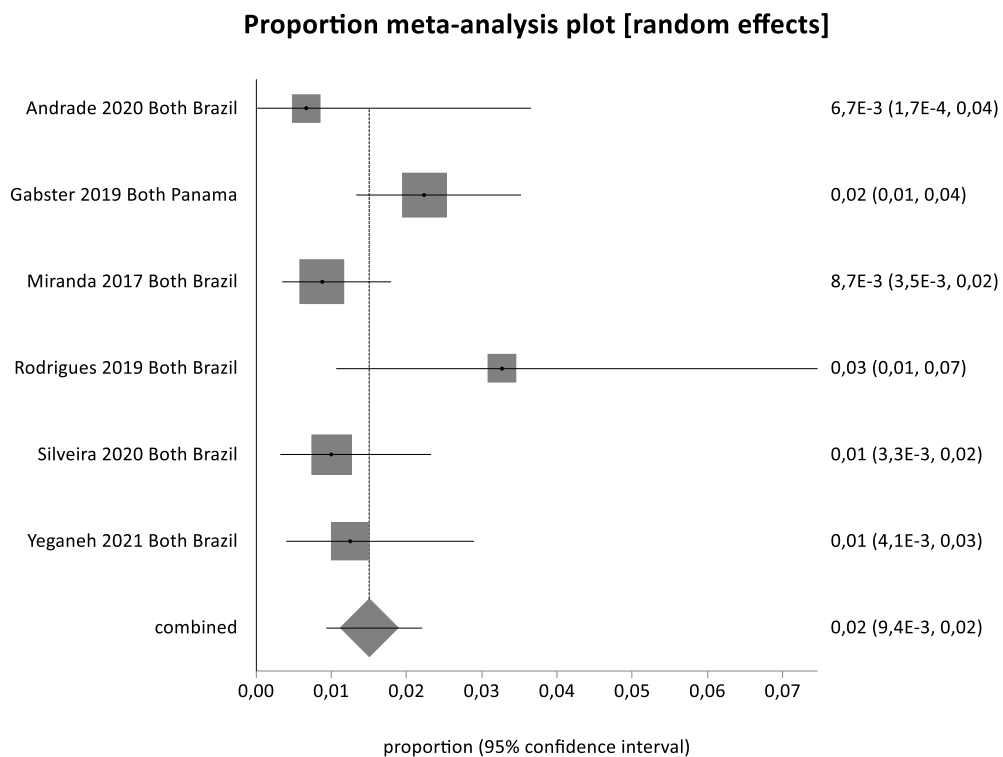

**Supplementary Material Figure S45. Burden of gonorrhoea in five years. Period 2010–2019. Prevalence of gonorrhoea in the high-risk population from 2010 to 2014**

Fixed effects (inverse variance)

Pooled proportion = 0.074555 (95% CI = 0.067931 to 0.081461)

Non-combinability of studies

Cochran Q = 477.64544 (df = 14) P < 0.0001

Moment-based estimate of between studies variance = 0.089203

I<sub>2</sub> (inconsistency) = 97.1% (95% CI = 96.5% to 97.5%)

Random effects (DerSimonian-Laird)

Pooled proportion = 0.06175 (95% CI = 0.029954 to 0.103967)

Bias indicators

Begg-Mazumdar: Kendall's 0.6 P = 0.0013

Egger: bias = 7.996518 (95% CI = 3.578907 to 12.41413) P = 0.0018

Harbord: bias = -4.008238 (92.5% CI = -13.161985 to 5.14551) P = 0.4121

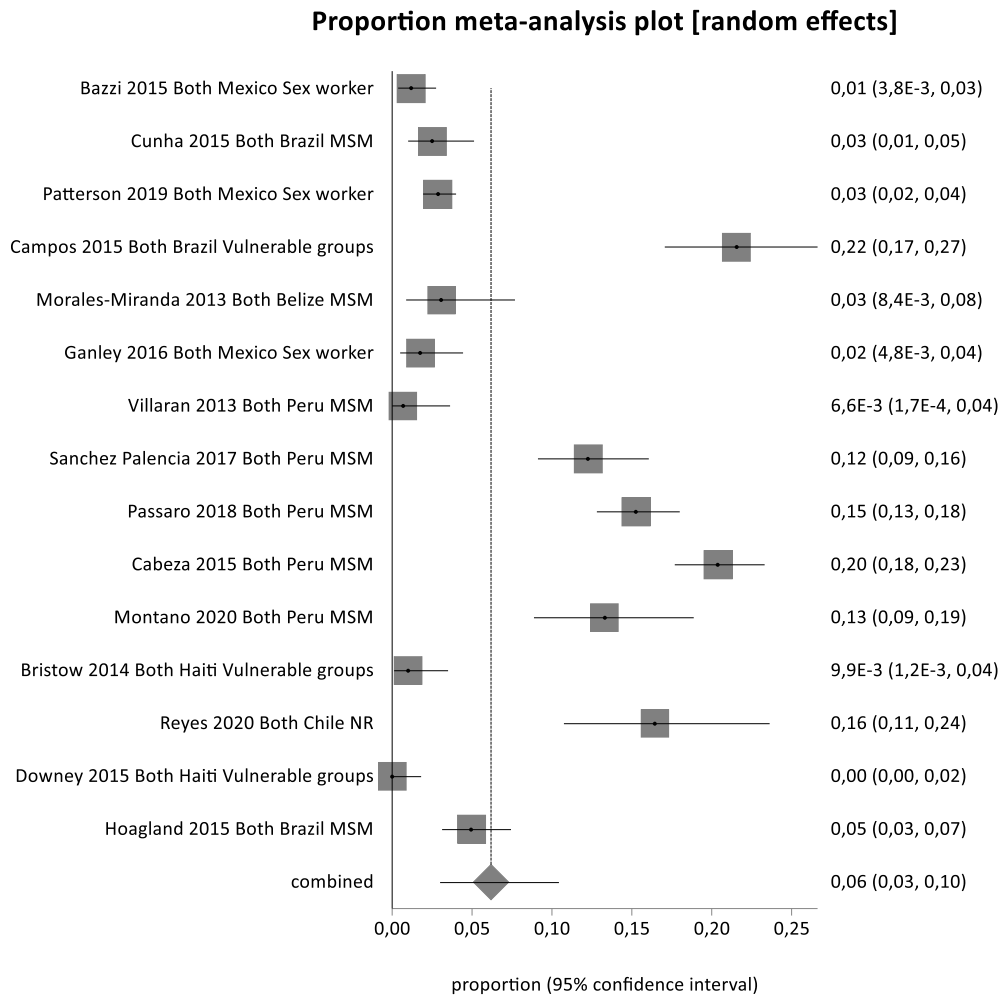

**Supplementary Material Figure S46. Burden of gonorrhoea in five years. Period 2010–2019. Prevalence of gonorrhoea in the high-risk population from 2015 to 2019**

Fixed effects (inverse variance)

Pooled proportion = 0.082805 (95% CI = 0.074663 to 0.091328)

Non-combinability of studies

Cochran Q = 139.531511 (df = 8) P < 0.0001

Moment-based estimate of between studies variance = 0.041327

I<sub>2</sub> (inconsistency) = 94.3% (95% CI = 91.7% to 95.7%)

Random effects (DerSimonian-Laird)

Pooled proportion = 0.074205 (95% CI = 0.041994 to 0.114631)

Bias indicators

Begg-Mazumdar: Kendall's 0.222222 P = 0.4767

Egger: bias = 5.230363 (95% CI = -2.261257 to 12.721983) P = 0.1427

Harbord: bias = -1.038545 (92.5% CI = -7.21777 to 5.14068) P = 0.7358

**Proportion meta-analysis plot [random effects]**

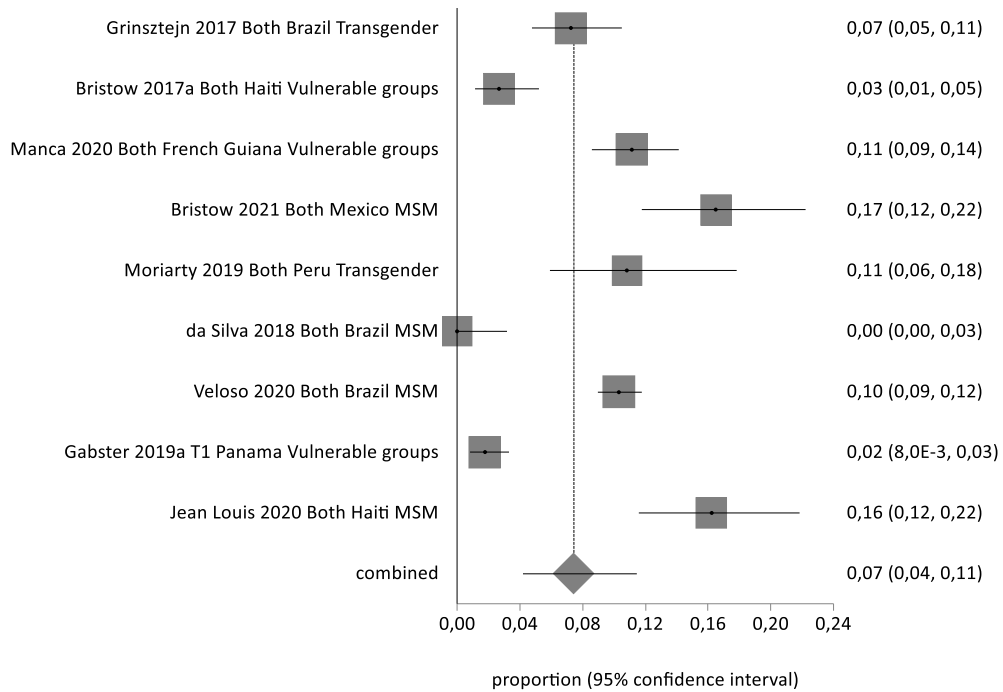

**Supplementary Material Figure S47. Sensitivity analysis. Studies with low risk of bias and non-high-risk population**

Fixed effects (inverse variance)

Pooled proportion = 0.002484 (95% CI = 0.001775 to 0.003312)

Non-combinability of studies

Cochran Q = 65.415069 (df = 4)  $P < 0,0001$

Moment-based estimate of between studies variance = 0.005682

$I^2$  (inconsistency) = 93.9% (95% CI = 89.2% to 96%)

Random effects (DerSimonian-Laird)

Pooled proportion = 0.004651 (95% CI = 0.001104 to 0.010625)

Bias indicators

Begg-Mazumdar: Kendall's 0.8  $P = 0.0833$

Egger: bias = 3.063876 (95% CI = -1.407425 to 7.535177)  $P = 0.1173$

Harbord: bias = 9.209387 (92.5% CI = -6.993954 to 25.412729)  $P = 0.225$

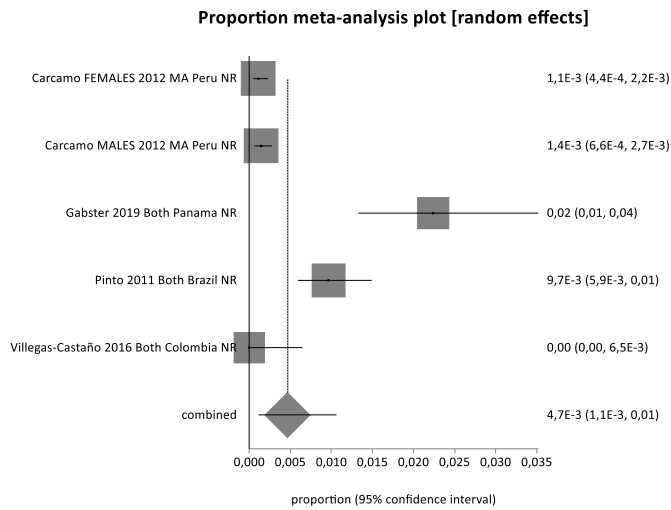

**Supplementary Material Figure S48. Sensitivity analysis. Studies with low risk of bias and high-risk population**

Fixed effects (inverse variance)

Pooled proportion = 0.01661 (95% CI = 0.013181 to 0.020427)

Non-combinability of studies

Cochran Q = 0.244741 (df = 2) P = 0.8848

Moment-based estimate of between studies variance = 0

I<sub>2</sub> (inconsistency) = 0% (95% CI = 0% to 72.9%)

Random effects (DerSimonian-Laird)

Pooled proportion = 0.01661 (95% CI = 0.013181 to 0.020427)

Bias indicators

Begg-Mazumdar: Kendall's <too few strata> P = \*

Egger: bias = \* (95% CI = \* to \*) P = \*

Harbord: bias = 0.218928 (92.5% CI = -0.11104 to 0.548897) P = 0.1124

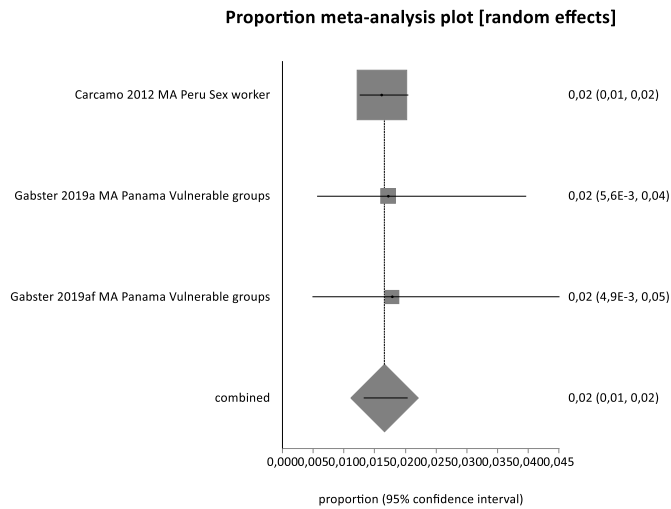



## References

- 1 Adachi K, Klausner JD, Bristow CC, et al. Chlamydia and Gonorrhoea in HIV-Infected Pregnant Women and Infant HIV Transmission. *Sex Transm Dis* 2015;42(10):554–65.
- 2 Alcântara MG. Perfil clínico e laboratorial de Pacientes soropositivos atendidos no CTA/SAE de Barcarena-PA, no período de 2010 a 2018. XXI Congresso Brasileiro de Infectologia 2019.
- 3 Allan-Blitz LT, Konda KA, Calvo GM, et al. High incidence of extra-genital gonorrhoeal and chlamydial infections among high-risk men who have sex with men and transgender women in Peru. *Int J STD AIDS* 2018;29:568–76.
- 4 Andrade J, Oliveira MA, Freneda de Parada AP, et al. Vulnerabilidade de mulheres que fazem sexo com mulheres às infecções sexualmente transmissíveis. *Cien Saude Colet* 2020;25(10):3809–19.
- 5 Baldin-Dal Pogetto MR, Silva MG, Parada CMGdL. Prevalence of sexually transmitted diseases in female sex workers in a city in the interior of São Paulo, Brazil. *Rev Lat Am Enfermagem* 2011;19(3):493–99.
- 6 Barbosa M, Pinto VM, Moherdau F, et al. Prevalence of *Neisseria gonorrhoeae* and *Chlamydia trachomatis* infection in men attending STD clinics in Brazil. *Sex Transm Infect* 2011;87(Suppl 1):A102–A03.
- 7 Bazzi AR, Rangel G, Martinez G, et al. Incidence and predictors of HIV and sexually transmitted infections among female sex workers and their intimate male partners in northern Mexico: A longitudinal, multilevel study. *Am J Epidemiol* 2015;181:723–31.
- 8 Benzaken A, Sabidó M, Galban E, et al. HIV and sexually transmitted infections at the borderlands: Situational analysis of sexual health in the Brazilian Amazon. *Sex Transm Infect* 2012;88:294–300.
- 9 Boldrini N, Miranda AE, Cossate JS, et al. Sexually transmitted infections among women living with HIV attending a clinic in Brazil. *Int J Gynecol Obstet* 2018;143:854.
- 10 Bristow CC, Desgrottes T, Cutler L, et al. The aetiology of vaginal symptoms in rural Haiti. *Int J STD AIDS* 2014;25:669–75.
- 11 Allan-Blitz LT, Leon SR, Bristow CC, et al. High prevalence of extra-genital chlamydial or gonococcal infections among men who have sex with men and transgender women in Lima, Peru. *Int J STD AIDS* 2017;28(2):138–44.
- 12 Bristow CC, Espinosa da Silva C, Vera AH, et al. Prevalence of bacterial sexually transmitted infections and coinfection with HIV among men who have sex with men and transgender women in Tijuana, Mexico. *Int J STD AIDS* 2021;32(8):751–57.
- 13 Cabeza J, Segura ER, Montano SM, et al. Extra-genital and urethral chlamydia trachomatis and *Neisseria gonorrhoeae* prevalence and associated risk factors in men who have sex with men and transgender women in Lima, Peru. *Sex Transm Infect* 2015;91:A177.
- 14 Campos PE, Buffardi AL, Cárcamo CP, et al. Reaching the unreachable: providing STI control services to female sex workers via mobile team outreach. *PLoS One* 2013;8:e81041.

- 15 Campos GB, Lobão TN, Selis NN, et al. Prevalence of *Mycoplasma genitalium* and *Mycoplasma hominis* in urogenital tract of Brazilian women. *BMC Infect Dis* 2015;15:60.
- 16 Cárcamo CP, Campos PE, García PJ, et al. Prevalences of sexually transmitted infections in young adults and female sex workers in Peru: a national population-based survey. *Lancet Infect Dis* 2012;12:765–73.
- 17 Cardona Arango D, Berbesí Fernández DY, Segura Cardona AM. Comportamiento de las consultas por infecciones de transmisión sexual Medellín, Colombia 2002-2006. *Investig andin* 2012;14:560–75.
- 18 Casco RH, García SD, Perazzi BE, et al. *Neisseria gonorrhoeae*. Resistencia a los antibióticos. *Dermatol argent* 2011;17:396–401.
- 19 Casillas-Vega N, Morfín-Otero R, García S, et al. Sexually transmitted pathogens, coinfections and risk factors in patients attending obstetrics and gynecology clinics in Jalisco, Mexico. *Salud publica Mex* 2012;58:437–45.
- 20 Castillo R, Konda KA, Leon SR, et al. HIV and Sexually Transmitted Infection Incidence and Associated Risk Factors among High-Risk MSM and Male-to-Female Transgender Women in Lima, Peru. *J Acquir Immune Defic Syndr* 2015;69:567–75.
- 21 Chacon-Cruz E, Lopatynsky-Reyes EZ, Almada-Salazar LA, et al. *Streptococcus agalactiae*, *streptococcus pneumoniae*, *neisseria meningitidis*, and *enterobacateriaceae* as leading causes of bacterial meningitis in infants younger than 3 months old in a Mexican hospital: 6 years of active surveillance. *Open Forum Infect Dis* 2018;5:S137–S38.
- 22 Christofolini DM, Leuzzi L, Mafra FA, et al. Prevalence of cases of *Mycoplasma hominis*, *Mycoplasma genitalium*, *Ureaplasma urealyticum* and *Chlamydia trachomatis* in women with no gynecologic complaints. *Reprod Med Biol* 2012;11:201–05.
- 23 Clark JL, Segura ER, Oldenburg CE, et al. Expedited Partner Therapy (EPT) increases the frequency of partner notification among MSM in Lima, Peru: a pilot randomized controlled trial. *BMC Med* 2017;15:1–12.
- 24 Creswell J, Guardado ME, Lee J, et al. HIV and STI control in El Salvador: Results from an integrated behavioural survey among men who have sex with men. *Sex Transm Infect* 2012;88:633–38.
- 25 Cunha CB, Friedman RK, de Boni RB, et al. *Chlamydia trachomatis*, *Neisseria gonorrhoeae* and syphilis among men who have sex with men in Brazil. *BMC Public Health* 2015;15:686–86.
- 26 da Silva GAR, Motta HLSáN, de Souza EFA, et al. *Chlamydia trachomatis* asymptomatic urethritis recurrence among males living with HIV-1. *Rev Inst Med Trop Sao Paulo* 2018;60:e65.
- 27 de Abreu AL, Malaguti N, Souza RP, et al. Association of human papillomavirus, *Neisseria gonorrhoeae* and *Chlamydia trachomatis* co-infections on the risk of high-grade squamous intraepithelial cervical lesion. *Am J Cancer Res* 2016;6:1371–83.
- 28 de Lima YA, Turchi MD, Fonseca ZC, et al. Sexually transmitted bacterial infections among young women in Central Western Brazil. *Int J Infect Dis* 2014;25:16–21.
- 29 de Menezes Filho JR, Sardinha JCG, Galbán E, et al. Effectiveness of syndromic management for male patients with urethral discharge symptoms in amazonas, Brazil. *An Bras Dermatol* 2017;92:779–84.

- 30 Detels R, Green AM, Klausner JD, et al. The incidence and correlates of symptomatic and asymptomatic Chlamydia trachomatis and Neisseria gonorrhoeae infections in selected populations in five countries. *Sex Transm Dis* 2011;38:503–09.
- 31 Downey RF, Hammar D, Jobe KA, et al. Epidemiology of sexually transmitted infections in rural Haitian men. *Int J STD AIDS* 2015;26(10):710–15.
- 32 Duncan J, Weir S, Byfield L, et al. STI prevalence and risk behaviors among establishment-based and street-based sex workers in Jamaica. *J AIDS Clin Res* 2014;5(7):320.
- 33 Edwards J, Hinds A, Lyons N, et al. A Chart Review Study of Sexually Transmitted Infections Among Persons Living with HIV Attending an STI Clinic in Trinidad. *J Int Assoc Provid AIDS Care* 2019;18:1–6.
- 34 Fernandes LB, Arruda JT, Approbato MS, et al. Infecção por Chlamydia trachomatis e Neisseria gonorrhoeae: fatores associados à infertilidade em mulheres atendidas em um serviço público de reprodução humana. [Chlamydia trachomatis and Neisseria gonorrhoeae infection: factors associated with infertility in women treated at a human reproduction public service]. *Rev Bras Ginecol Obstet* 2014;36(8):353–58.
- 35 Figueroa JP, Weir SS, Jones-Cooper C, et al. High HIV prevalence among men who have sex with men in Jamaica is associated with social vulnerability and other sexually transmitted infections. *West Indian Medical Journal* 2012;61:18.
- 36 Gabster A, Mayaud P, Martinez A, et al. High prevalence of cervico-vaginal infections among female adolescents in four urban regions of Panama. *Sex Transm Infect* 2019;95:A68.
- 37 Galárraga O, Sosa-Rubí SG, González A, et al. The disproportionate burden of HIV and STIs among male sex workers in Mexico City and the rationale for economic incentives to reduce risks. *J Int AIDS Soc* 2014;17:19218.
- 38 Ganley KY, Zullo AR, Sosa-Rubi SG, et al. Incidence and time-varying predictors of HIV and sexually transmitted infections among male sex workers in Mexico City. *J Int AIDS Soc* 2016;19:20–22.
- 39 García PJ, Fazio B, Bayer AM, et al. Sexual health knowledge and practices and STI/HIV prevalence among long-distance truck drivers in Peru. *SAGE Open Medicine* 2017;5
- 40 García JI, Sabido M, Nikiforov M, et al. The UALE project: a cross-sectional approach for trends in HIV/STI prevalence among key populations attending STI clinics in Guatemala. *BMJ Open* 2018;8(9):e022632.
- 41 García-González I, López-Díaz RI, Canché-Pech JR, et al. Prevalence of sexually transmitted infections in symptomatic and asymptomatic patients from Yucatan. *Rev del Lab Clin* 2017;10(3):117–22.
- 42 Goins J, Romero LM, De María Hernandez F, et al. High prevalence of STIs and risk behaviours among persons living with HIV in Nicaragua: Missed opportunities for prevention. *Sex Transm Infect* 2011;87:A178–A79.
- 43 Gonzalez SM, Garcia Messina O, Angeleri P, et al. Sífilis: experiencia en un Hospital General de Agudos de la Ciudad Autónoma de Buenos Aires. XV Congreso Sociedad Argentina de Infectología, 2014.
- 44 Grinsztejn B, Jalil EM, Monteiro L, et al. Unveiling of HIV dynamics among transgender women: a respondent-driven sampling study in Rio de Janeiro, Brazil. *Lancet HIV* 2017;4(4):e169–e76.

- 45 Gutiérrez-Sandí W, Chaverri-Murillo J, Navarro-Cruz JE. Enfermedades de transmisión sexual y salud sexual del costarricense: Sífilis y gonorrea. *Tecnología en Marcha* 2016;29-4:3–15.
- 46 Ham C, Guardado M, Nieto A, et al. Factors associated with HIV among men who have sex with men in 2 cities in el Salvador: The importance of other stis. *Sex Transm Dis* 2014;41:S82–S83.
- 47 Hernandez F, Arambú N, Alvarez B, et al. High incidence of HIV and low HIV prevention coverage among men who have sex with men in Managua, Nicaragua. *Sex Transm Infect* 2011;87:A146.
- 48 Hernandez-Martinez F, Hernandez-Garcia JA, Martinez-Pena MD, et al. Aetiology and frequency of cervico-vaginal infections among Mexican women. *Afr J Microbiol Res* 2013;7(1):27–34.
- 49 Hoagland B, Veloso VG, De Boni RB, et al. Pre-exposure prophylaxis uptake and associated factors among MSM and TGW in the PrEP Brasil demonstration project. *J Int AIDS Soc* 2015;18:48–50.
- 50 Hobbs M, Anderson C, Hylton-Kong T, et al. Syndromic management of cervicitis and vaginal discharge at a STI clinic in Jamaica: Low cure rates for chlamydial infection and trichomoniasis. *Sex Transm Infect* 2011;87:A272–A73.
- 51 Huneus A, Schilling A, Fernandez MI. Prevalence of Chlamydia Trachomatis, Neisseria Gonorrhoeae, and Trichomonas Vaginalis Infection in Chilean Adolescents and Young Adults. *J Pediatr Adolesc Gynecol* 2018;31(4):411–15.
- 52 Jean Louis F, Galbaud G, Leonard M, et al. Prevalence of Neisseria gonorrhoeae and Chlamydia trachomatis in men having sex with men in Port-au-Prince, Haiti: A cross-sectional study. *BMJ Open* 2020;10(3):e033976.
- 53 Lima LdM, Hoelzle CR, Simoes RT, et al. Sexually transmitted infections detected by multiplex real time PCR in asymptomatic women and association with cervical intraepithelial neoplasia. *Rev Bras Ginecol Obstet* 2018;40(9):540–46.
- 54 Luchiaro HR, Ferreira CST, Golim MA, et al. Cervicovaginal bacterial count and failure of metronidazole therapy for bacterial vaginosis. *Int J Gynaecol Obstet* 2016;132(3):297–301.
- 55 Luppi CG, de Oliveira RLS, Veras MA, et al. Early diagnosis and correlations of sexually transmitted infections among women in primary care health services. *Rev Bras Epidemiol* 2011;14(3):467–77.
- 56 Manca MF, Rochat-Stettler L, Carod JF, et al. High prevalence of Chlamydia trachomatis and Neisseria gonorrhoeae in Western French Guiana. *Braz J Infect Dis* 2020;24(3):256–60.
- 57 Marchezini R, Rosângela M, Aparecida Machado de Oliveira D, et al. SEXUALLY TRANSMITTED INFECTIONS IN SPECIALIZED SERVICE: WHO THEY ARE AND WHO HAS THEM? *Journal of Nursing UFPE / Revista de Enfermagem UFPE* 2018;12(1):137–49.
- 58 Melo MGD, Sprinz E, Gorbach PM, et al. HIV-1 heterosexual transmission and association with sexually transmitted infections in the era of treatment as prevention. *Int J Infect Dis* 2019;87:128–34.
- 59 Mendizabal-Burastero R, Vargas C, Galindo-Arandi C, et al. Anal and oropharyngeal STI surveillance among men who have sex with men in Guatemala. *Sex Transm Infect* 2015;91:A176.
- 60 Mendoza L, Mongelos P, Paez M, et al. Human papillomavirus and other genital infections in indigenous women from Paraguay: a cross-sectional analytical study. *BMC Infect Dis* 2013;13:531.

- 61 Miranda AE, Silveira MF, Travassos AG, et al. Prevalence of Chlamydia trachomatis and Neisseria gonorrhoea and associated factors among women living with Human Immunodeficiency Virus in Brazil: a multicenter study. *Braz J Infect Dis* 2017;21(4):402–07.
- 62 Montano MA, Alfaro R, Ness T, et al. Sexual Behavior and Sexually Transmitted Infection Outcomes among Men Who Have Sex with Men and Transgender Women Participating in a Study of the Timing of Antiretroviral Therapy in Lima, Peru. *Sex Transm Dis* 2020;47(12):825–31.
- 63 Morales-Miranda S, Alvarez B, Manzanero M. Prevalence of HIV/STIs and risk behavior in men who have a sex with men, Belize, 2012. *Sex Transm Infect* 2013;89
- 64 Morales-Miranda S, Manzanero M, Loya I, et al. Risk behavior and sexually transmitted infections among people living with HIV/AIDS in Belize, 2012. *Sex Transm Infect* 2013;89
- 65 Moriarty KE, Segura ER, Gonzales W, et al. Assessing sexually transmitted infections and HIV risk among transgender women in Lima, Peru: Beyond behavior. *LGBT Health* 2019;6(7):370–76.
- 66 Mucci MJ, Cuestas ML, Cervetto MM, et al. A prospective observational study of vulvovaginitis in pregnant women in Argentina, with special reference to candidiasis. *Mycoses* 2016;59(7):429–35.
- 67 Nuñez-Forero L, Moyano LF, Angel-Müller E, et al. Diagnostic accuracy of rapid tests for c. Trachomatis, n. Gonorrhoeae and syphilis at The Point of care in women with symptoms of lower genital tract infection. *Int J Gynaecol Obstet* 2012;119:S353–S54.
- 68 Occhionero M, Paniccia L, Pedersen D, et al. Prevalencia de disfunción vaginal en mujeres de la ciudad de Bahía Blanca (Argentina) Vaginal dysfunction prevalence in women of the city of Bahía Blanca (Argentina) A prevalência de disfunção vaginal em mulheres da cidade de Bahía Blanca (Argentina). *Acta Bioquím Clín Latinoam* 2018;52(4):429–39.
- 69 Ovalle A, Martínez MA, de la Fuente F, et al. Prevalence of sexually transmitted infections in pregnant women attending a public hospital in Chile. *Rev Chilena Infectol* 2012;29(5):517–20.
- 70 Pantoja M, Campos EA, Pitta DR, et al. Prevalence of Chlamydia trachomatis infection among women candidates for in vitro fertilization at a public institution of the State of São Paulo, Brazil. *Rev Bras Ginecol Obstet* 2012;34(9):425–31.
- 71 Paredes MC, Gómez YM, Torres AM, et al. Prevalencia de infecciones por Chlamydia trachomatis y Neisseria gonorrhoeae en adolescentes de colegios de la provincia de Sabana Centro, Cundinamarca, Colombia. *Biomédica (Bogotá)* 2015;35(3):314–24.
- 72 Passaro RC, Segura ER, Perez-Brumer A, et al. Body parts matter: Social, behavioral, and biological considerations for urethral, pharyngeal, and rectal gonorrhoea and chlamydia screening among MSM in Lima, Peru. *Sex Transm Dis* 2018;45(9):607–14.
- 73 Patterson TL, Strathdee SA, Semple SJ, et al. Prevalence of HIV/STIs and correlates with municipal characteristics among female sex workers in 13 Mexican cities. *Salud Publica Mex* 2019;61(2):116–24.
- 74 Peña-Toribio A, Aguilera-Arreola M, García-Mendiola R, et al. Factores de riesgo para uretritis de transmisión sexual en hombres que tiene sexo con hombres. *Revista de Infectología y Microbiología Clínica* 2019;39:C64.
- 75 Perez-Brumer AG, Konda KA, Salvatierra HJ, et al. Prevalence of HIV, STIs, and Risk Behaviors in a Cross-Sectional Community- and Clinic-Based Sample of Men Who Have Sex with Men (MSM) in Lima, Peru. *PLoS ONE* 2013;8(4):e59072.

- 76 Piazzetta RCPS, de Carvalho NS, de Andrade RP, et al. Prevalência da infecção por Chlamydia Trachomatis e Neisseria Gonorrhoea em mulheres jovens sexualmente ativas em uma cidade do Sul do Brasil. *Rev Bras Ginecol Obstet* 2011;33(11):328–33.
- 77 Pinto VM, Tancredi MV, Silva RJ, et al. Prevalence and factors associated with Chlamydia trachomatis infection among women with HIV in São Paulo. *Rev Soc Bras Med Trop* 2016;49(3):312–18.
- 78 Piscopo R. Bacterial infection other than Chlamydia associated to tubal factor of infertility suggests new approach. *Hum Reprod* 2018;33:i305–i06.
- 79 Pollett S, Calderon M, Heitzinger K, et al. Prevalence and predictors of cervicitis in female sex workers in Peru: an observational study. *BMC Infect Dis* 2013;13(1):195.
- 80 Rahman G, Ocampo D, Rubinstein A, et al. Prevalencia de vulvovaginitis y su relación con hallazgos físicos en niñas evaluadas por sospecha de abuso sexual infantil. *Arch Argent Pediatr* 2015;113(5):390–96.
- 81 Reyes R T, Villanueva H, Bórquez B C, et al. Prevalencia de Neisseria gonorrhoeae, en reclusos del Centro de Detención Preventiva de Arica. *Rev Chilena Infectol* 2020;37(1):32–36.
- 82 Ribas CBR, Cunha MGS, Schettini APM, et al. Perfil clínico-epidemiológico das doenças sexualmente transmissíveis em crianças atendidas em um centro de referência na cidade de Manaus, Amazonas, Brasil. *An Bras Dermatol* 2011;86(1):80–86.
- 83 Rocha DA, Filho RA, Mariño JM, et al. "Hidden" sexually transmitted infections among women in primary care health services, Amazonas, Brazil. *Int J STD AIDS* 2014;25(12):878–86.
- 84 Rodrigues MM, Fernandes PÁ, Haddad JP, et al. Frequency of Chlamydia trachomatis, Neisseria gonorrhoeae, Mycoplasma genitalium, Mycoplasma hominis and Ureaplasma species in cervical samples. *J Obstet Gynaecol* 2011;31(3):237–41.
- 85 Rodrigues LLS, Hardick J, Nicol AF, et al. Sexually transmitted infections among HIV-infected and HIV-uninfected women in the Tapajós region, Amazon, Brazil: Self-collected vs. clinician-collected samples. *PLoS One* 2019;14(4):e0215001.
- 86 Rodríguez I, Hernández Y. Sexually Transmitted Diseases during the COVID-19 pandemic: a focus on syphilis and gonorrhoea in Cuba. *Public Health Pract (Oxf)* 2020;2(100072):100072.
- 87 Rojas AM, Duran SM, Perdomo FC. Enfermedades de transmisión sexual en la población urbana de Mitú, Vaupes, 2005 a 2009. *Inf Quinc Epidemiol Nac* 2012;17(11):125–40.
- 88 Sabidó M, Lahuerta M, Montoliu A, et al. Human immunodeficiency virus, sexually transmitted infections, and risk behaviors among clients of sex workers in Guatemala: are they a bridge in human immunodeficiency virus transmission? *Sex Transm Dis* 2011;38(8):735–42.
- 89 Sánchez Palencia L, Acosta Cáceres J. Mutaciones en la región determinante de resistencia a quinolonas (QRDR) del gen gyrA de Neisseria gonorrhoeae presente en muestras clínicas de hombres que tienen sexo con hombres. *Rev Peru Biol* 2017;24(3):283.
- 90 Scheidell J, Khan M, Maurelli A. Sexually transmitted infection prevalence and associated sexual risk behaviors among adult Haitian men and women. *Sex Transm Dis* 2016;43(10):S188.
- 91 Scheidell JD, Beau De Rochars VM, Séraphin MN, et al. Socioeconomic vulnerability and sexually transmitted infection among pregnant Haitian women. *Sex Transm Dis* 2018;45(9):626–31.

- 92 Silveira MF, Bruni MP, Stauffert D, et al. Prevalence and risk factors associated with Chlamydia trachomatis, Neisseria gonorrhoeae, and Mycoplasma genitalium among women in Pelotas, Southern Brazil. *Int J STD AIDS* 2020;31(5):432–39.
- 93 Snead MC, Wiener J, Ewumi S, et al. Prevalence and risk factors associated with STIs among women initiating contraceptive implants in Kingston, Jamaica. *Sex Transm Infect* 2017;93(7):503–07.
- 94 Souza RP, De Abreu ALP, Ferreira EC, et al. Short report: Simultaneous detection of seven sexually transmitted agents in human immunodeficiency virus-infected Brazilian women by multiplex polymerase chain reaction. *Am J Trop Med Hyg* 2013;89(6):1199–202.
- 95 Strathdee SA, Lozada R, Martinez G, et al. Social and structural factors associated with HIV infection among female sex workers who inject drugs in the Mexico-US border region. *PLoS One* 2011;6(4):e19048.
- 96 Tinajeros F, Miller WM, Castro L, et al. Declining sexually transmitted infections among female sex workers: the results of an HIV and sexually transmitted infection prevention strategy in Honduras, 2006–08. *Int J STD AIDS* 2012;23(2):88–93.
- 97 Travassos AG, Xavier-Souza E, Netto E, et al. Anogenital infection by Chlamydia trachomatis and Neisseria gonorrhoeae in HIV-infected men and women in Salvador, Brazil. *Braz J Infect Dis* 2016;20(6):569–75.
- 98 Veloso VG, Vega-Ramírez EH, Hoagland B, et al. Factors associated with early continuation (EC) of preexposure prophylaxis (PrEP) among young MSM (YMSM) in Brazil, Peru and Mexico: The ImPrEP Study. *J Int AIDS Soc* 2020;23(SUPPL 4)
- 99 Villaran M, Iglesias D, Sanchez J. Prevalence and bio behavioral correlates of carcinogenic HPV infection among HIV infected men who have sex with men (MSM) in Lima, Peru. *Am J Trop Med Hyg* 2013;89(5):373.
- 100 Villegas A, McEwen J, Martínez A, et al. Prevalencia y caracterización molecular de Chlamydia trachomatis y Neisseria gonorrhoeae en habitantes de calle y población vulnerable de la ciudad de Medellín. *Infectio* 2018;22:212.
- 101 Villegas-Castaño A, Tamayo-Acevedo LS. Prevalence of sexually transmitted infections, and risk factor for sexual health of adolescents, Medellín, Colombia, 2013. *Iatreia* 2016;29(1):5–17.
- 102 Wohlmeister D, Vianna DR, Helfer VE, et al. Association of human papillomavirus and Chlamydia trachomatis with intraepithelial alterations in cervix samples. *Mem Inst Oswaldo Cruz* 2016;111(2):106–13.
- 103 Yeganeh N, Kreitchmann R, Leng M, et al. High prevalence of sexually transmitted infections in pregnant women living in southern Brazil. *Sex Transm Dis* 2021;48(2):128–33.
- 104 Zotta MC, Layayen S, Galeano G, et al. Infección por neisseria gonorrhoeae y fenotipos de resistencia antimicrobiana, Mar del Plata, 2005-2010. *Acta Bioquím Clín Latinoam* 2014;48(4):475–83.
- 105 Bastos TdR. Infecção gonocócica: uma análise da prevalência no Brasil no período de 2009 a 2019. XXI Congresso Brasileiro de Infectologia 2019.
- 106 Departamento de Estadísticas e Información de Salud (DEIS) del Ministerio de Salud de Chile. DEIS 2021. <https://deis.minsal.cl/sistemas-de-informacion/>
- 107 SISPRO. Misiterio de Salud Colombia. 2021. <https://www.sispro.gov.co/Pages/Home.aspx>

108 Secretaría de Salud de la Dirección General de Información en Salud (DGIS) de México. Sistema Nacional de Información en Salud (SINAIS). 2021. <http://sinaiscap.salud.gob.mx:8080/DGIS/>
